# Supplementary material for: Approaching complexity of alkyl hydrogenation on Pd via density-functional modelling
Source: Royal Society of Chemistry journal article supplement (doi:10.1039/c7cp03516k), 2017-01-01
Supplement: c7cp03516k1.pdf [file c7cp03516k1.pdf]

## Electronic Supplementary Information

### Approaching complexity of alkyl hydrogenation on Pd by density-functional modelling

Hristiyan A. Aleksandrov,<sup>1,2\*</sup> Sergey M. Kozlov,<sup>1</sup> Georgi N. Vayssilov,<sup>2</sup>  
Konstantin M. Neyman<sup>1,3</sup>

<sup>1</sup> Departament de Ciència dels Materials i Química Física and Institut de Química Teòrica i Computacional (IQTCUB), Universitat de Barcelona, Martí i Franquès 1, 08028 Barcelona, Spain

<sup>2</sup> Faculty of Chemistry and Pharmacy, University of Sofia, 1126 Sofia, Bulgaria

<sup>3</sup> ICREA (Institució Catalana de Recerca i Estudis Avançats), 08010 Barcelona, Spain

\* corresponding author, e-mail: haa@chem.uni-sofia.bg

#### Content

**Table S1.** Activation barriers ( $\Delta E^\ddagger$ ) for ethyl hydrogenation to ethane on Pd(111) slab and Pd<sub>79</sub> nanoparticle models. Binding energies of both reactants (ethyl+H),  $E_b$ ; binding energies of attacking H atom,  $E_b(\text{H})$ ; binding energies of ethyl species,  $E_b(\text{ethyl})$ ; (full) metal-adsorbates (Pd-(ethyl+H<sup>att</sup>)) interaction energies,  $E_{\text{int}}$ ; deformation energies of the Pd surface and the ethyl adsorbate,  $E_d(\text{Pd})$  and  $E_d(\text{C}_2\text{H}_5)$ , respectively; energies describing the lateral interaction between ethyl species and attacking H atom,  $E_{\text{coads}}$  are also shown for the IS and TS structures.  $\text{H}^{fcc}$  and  $\text{H}^{tss}$  indicate surface and subsurface H atoms, respectively. All energies are given in kJ/mol.

**Table S2.** Activation barriers ( $\Delta E^\ddagger$ ) for ethyl hydrogenation to ethane on Pd(111) slab and Pd<sub>79</sub> nanoparticle. The energy difference between TS and IS structures in the binding energies of both reactants (ethyl+H),  $\Delta E_b$ ; (full) metal-adsorbates (Pd-(ethyl+H<sup>att</sup>)) interaction energies,  $\Delta E_{\text{int}}$ ; deformation energies of the Pd surface and the ethyl adsorbate,  $\Delta E_d(\text{Pd})$  and  $\Delta E_d(\text{ethyl})$ , respectively; energies describing the lateral interaction between ethyl species and attacking H atom,  $\Delta E_{\text{coads}}$ .  $\text{H}^{fcc}$  and  $\text{H}^{tss}$  indicate surface and subsurface H atoms, respectively. All energies are given in kJ/mol.

#### Table S3

Relative energies (in kJ/mol) of the IS, TS and FS structures of the reaction:  $\text{C}_2\text{H}_5 + 78 \text{H}^{fcc} + 24 \text{H}^{tss} \rightarrow \text{C}_2\text{H}_6 + 77 \text{H}^{fcc} + 24 \text{H}^{tss}$  when ethyl species is located at terrace and edge sites of Pd<sub>79</sub> nanoparticle.

#### Structures of the obtained transition states

**Table S1.** Activation barriers ( $\Delta E^\ddagger$ ) for ethyl hydrogenation to ethane on Pd(111) slab and Pd<sub>79</sub> nanoparticle models. Binding energies of both reactants (ethyl+H), E<sub>b</sub>; binding energies of attacking H atom, E<sub>b</sub>(H); binding energies of ethyl species, E<sub>b</sub>(ethyl); (full) metal-adsorbates (Pd-(ethyl)+H<sup>att</sup>) interaction energies, E<sub>int</sub>; deformation energies of the Pd surface and the ethyl adsorbate, E<sub>d</sub>(Pd) and E<sub>d</sub>(C<sub>2</sub>H<sub>5</sub>), respectively; energies describing the lateral interaction between ethyl species and attacking H atom, E<sub>coads</sub> are also shown for the IS and TS structures. H<sup>fcc</sup> and H<sup>ss</sup> indicate surface and subsurface H atoms, respectively. All energies are given in kJ/mol.

| N <sup>a</sup> | Elementary reaction                                                                                                                                 | $\Delta E^\ddagger$ | E <sub>b</sub> |      | E <sub>b</sub> (H) |      | E <sub>b</sub> (ethyl) |      | E <sub>int</sub> |    | E <sub>d</sub> (Pd) |    | E <sub>d</sub> (ethyl) |      | E <sub>coads</sub> |    |
|----------------|-----------------------------------------------------------------------------------------------------------------------------------------------------|---------------------|----------------|------|--------------------|------|------------------------|------|------------------|----|---------------------|----|------------------------|------|--------------------|----|
|                |                                                                                                                                                     |                     | IS             | TS   | IS                 | TS   | IS                     | TS   | IS               | TS | IS                  | TS | IS                     | TS   | IS                 | TS |
| (a)            | C <sub>2</sub> H <sub>5</sub> + H <sup>fcc</sup> → C <sub>2</sub> H <sub>6</sub>                                                                    | 53                  | -424           | -372 | -261               | -147 | -468                   | -141 | 15               | 5  | 19                  | 23 | 10                     | -259 |                    |    |
| (b)            | C <sub>2</sub> H <sub>5</sub> + H <sup>fcc</sup> → C <sub>2</sub> H <sub>6</sub>                                                                    | 50                  | -425           | -375 | -262               | -148 | -468                   | -148 | 15               | 6  | 20                  | 21 | 8                      | -253 |                    |    |
| (a)            | C <sub>2</sub> H <sub>5</sub> + 7 H <sup>fcc</sup> → C <sub>2</sub> H <sub>6</sub> + 6 H <sup>fcc</sup>                                             | 47                  | -390           | -343 | -250               | -122 | -444                   | -151 | 24               | 15 | 18                  | 22 | 11                     | -229 |                    |    |
| (b)            | C <sub>2</sub> H <sub>5</sub> + 7 H <sup>fcc</sup> → C <sub>2</sub> H <sub>6</sub> + 6 H <sup>fcc</sup>                                             | 41                  | -394           | -353 | -253               | -124 | -446                   | -135 | 24               | 11 | 18                  | 20 | 11                     | -249 |                    |    |
| (a)            | C <sub>2</sub> H <sub>5</sub> + 7 H <sup>fcc</sup> + 9 H <sup>ss</sup> → C <sub>2</sub> H <sub>6</sub> + 6 H <sup>fcc</sup> + 9 H <sup>ss</sup>     | 42                  | -369           | -326 | -243               | -113 | -434                   | -157 | 36               | 18 | 19                  | 22 | 10                     | -209 |                    |    |
| (a-b)          | C <sub>2</sub> H <sub>5</sub> + 7 H <sup>fcc</sup> + 9 H <sup>ss</sup> → C <sub>2</sub> H <sub>6</sub> + 6 H <sup>fcc</sup> + 9 H <sup>ss</sup>     | 37                  | -372           | -335 | -246               | -116 | -439                   | -150 | 38               | 14 | 18                  | 20 | 11                     | -219 |                    |    |
| (c-b)          | C <sub>2</sub> H <sub>5</sub> + 8 H <sup>fcc</sup> + 8 H <sup>ss</sup> → C <sub>2</sub> H <sub>6</sub> + 7 H <sup>fcc</sup> + 8 H <sup>ss</sup>     | 3 <sup>b</sup>      | -340           | -305 | -240               | -85  | -425                   | -139 | 58               | 34 | 17                  | 18 | 10                     | -218 |                    |    |
| (d-b)          | C <sub>2</sub> H <sub>5</sub> + 8 H <sup>fcc</sup> + 8 H <sup>ss</sup> → C <sub>2</sub> H <sub>6</sub> + 7 H <sup>fcc</sup> + 8 H <sup>ss</sup>     | 3 <sup>b</sup>      | -356           | -320 | -242               | -101 | -422                   | -138 | 39               | 18 | 18                  | 19 | 9                      | -218 |                    |    |
| terrace        | C <sub>2</sub> H <sub>5</sub> + H <sup>fcc</sup> → C <sub>2</sub> H <sub>6</sub>                                                                    | 54                  | -439           | -385 | -267               | -157 | -488                   | -145 | 18               | 9  | 20                  | 24 | 12                     | -274 |                    |    |
| terrace        | C <sub>2</sub> H <sub>5</sub> + 78 H <sup>fcc</sup> → C <sub>2</sub> H <sub>6</sub> + 77 H <sup>fcc</sup>                                           | 46                  | -398           | -353 | -247               | -128 | -451                   | -152 | 22               | 13 | 21                  | 23 | 8                      | -237 |                    |    |
| terrace        | C <sub>2</sub> H <sub>5</sub> + 78 H <sup>fcc</sup> + 24 H <sup>ss</sup> → C <sub>2</sub> H <sub>6</sub> + 77 H <sup>fcc</sup> + 24 H <sup>ss</sup> | 16                  | -354           | -339 | -231               | -119 | -420                   | -202 | 29               | 16 | 22                  | 22 | 15                     | -175 |                    |    |
| terrace        | C <sub>2</sub> H <sub>5</sub> + 79 H <sup>fcc</sup> + 23 H <sup>ss</sup> → C <sub>2</sub> H <sub>6</sub> + 78 H <sup>fcc</sup> + 23 H <sup>ss</sup> | 14                  | -321           | -306 | -230               | -105 | -406                   | -193 | 28               | 18 | 21                  | 22 | 14                     | -175 |                    |    |

<sup>a</sup> Initial position of attacking H atom or change in the position is shown for the slab models, while the location of ethyl species at the terrace site is indicated for the NP models; <sup>b</sup> barrier for ethyl hydrogenation from the H already located at the surface

**Table S2.** Activation barriers ( $\Delta E^\ddagger$ ) for ethyl hydrogenation to ethane on Pd(111) slab and Pd<sub>79</sub> nanoparticle. The energy difference between TS and IS structures in the binding energies of both reactants (ethyl+H),  $\Delta E_b$ ; (full) metal-adsorbates (Pd-(ethyl+H<sup>att</sup>)) interaction energies,  $\Delta E_{int}$ ; deformation energies of the Pd surface and the ethyl adsorbate,  $\Delta E_d(\text{Pd})$  and  $\Delta E_d(\text{ethyl})$ , respectively; energies describing the lateral interaction between ethyl species and attacking H atom,  $\Delta E_{coads}$ . H<sup>fcc</sup> and H<sup>ass</sup> indicate surface and subsurface H atoms, respectively. All energies are given in kJ/mol.

| N <sup>a</sup> | Elementary reaction                                                                                                                     | $\Delta E^\ddagger$ | $\Delta E_b$ | $\Delta E_{int}$ | $\Delta E_d(\text{Pd})$ | $\Delta E_d(\text{ethyl})$ | $\Delta E_{coads}$ |
|----------------|-----------------------------------------------------------------------------------------------------------------------------------------|---------------------|--------------|------------------|-------------------------|----------------------------|--------------------|
| (a)            | $\text{C}_2\text{H}_5 + \text{H}^{fcc} \rightarrow \text{C}_2\text{H}_6$                                                                | 53                  | 52           | 327              | -10                     | 4                          | -269               |
| (b)            | $\text{C}_2\text{H}_5 + \text{H}^{fcc} \rightarrow \text{C}_2\text{H}_6$                                                                | 50                  | 50           | 320              | -9                      | 1                          | -261               |
| (a)            | $\text{C}_2\text{H}_5 + 7 \text{H}^{fcc} \rightarrow \text{C}_2\text{H}_6 + 6 \text{H}^{fcc}$                                           | 47                  | 47           | 293              | -9                      | 4                          | -241               |
| (b)            | $\text{C}_2\text{H}_5 + 7 \text{H}^{fcc} \rightarrow \text{C}_2\text{H}_6 + 6 \text{H}^{fcc}$                                           | 41                  | 41           | 311              | -13                     | 2                          | -260               |
| (a)            | $\text{C}_2\text{H}_5 + 7 \text{H}^{fcc} + 9 \text{H}^{ass} \rightarrow \text{C}_2\text{H}_6 + 6 \text{H}^{fcc} + 9 \text{H}^{ass}$     | 42                  | 43           | 277              | -18                     | 3                          | -219               |
| (b)            | $\text{C}_2\text{H}_5 + 7 \text{H}^{fcc} + 9 \text{H}^{ass} \rightarrow \text{C}_2\text{H}_6 + 6 \text{H}^{fcc} + 9 \text{H}^{ass}$     | 37                  | 37           | 289              | -24                     | 2                          | -230               |
| (c-b)          | $\text{C}_2\text{H}_5 + 8 \text{H}^{fcc} + 8 \text{H}^{ass} \rightarrow \text{C}_2\text{H}_6 + 7 \text{H}^{fcc} + 8 \text{H}^{ass}$     | 35 <sup>b</sup>     | 35           | 286              | -24                     | 1                          | -228               |
| (d-b)          | $\text{C}_2\text{H}_5 + 8 \text{H}^{fcc} + 8 \text{H}^{ass} \rightarrow \text{C}_2\text{H}_6 + 7 \text{H}^{fcc} + 8 \text{H}^{ass}$     | 36 <sup>b</sup>     | 37           | 284              | -21                     | 1                          | -227               |
| terrace        | $\text{C}_2\text{H}_5 + \text{H}^{fcc} \rightarrow \text{C}_2\text{H}_6$                                                                | 53                  | 58           | 343              | -9                      | 4                          | -281               |
| terrace        | $\text{C}_2\text{H}_5 + 78 \text{H}^{fcc} \rightarrow \text{C}_2\text{H}_6 + 77 \text{H}^{fcc}$                                         | 46                  | 47           | 299              | -9                      | 2                          | -244               |
| terrace        | $\text{C}_2\text{H}_5 + 78 \text{H}^{fcc} + 24 \text{H}^{ass} \rightarrow \text{C}_2\text{H}_6 + 77 \text{H}^{fcc} + 24 \text{H}^{ass}$ | 16                  | 16           | 218              | -13                     | 0                          | -189               |
| terrace        | $\text{C}_2\text{H}_5 + 78 \text{H}^{fcc} + 24 \text{H}^{ass} \rightarrow \text{C}_2\text{H}_6 + 78 \text{H}^{fcc} + 23 \text{H}^{ass}$ | 14                  | 15           | 213              | -10                     | 1                          | -188               |

<sup>a</sup> Initial position of attacking H atom or change in the position is shown for the slab models, while the location of ethyl species at the terrace site is indicated for the NP models; <sup>b</sup> barrier for ethyl hydrogenation from the H already located at the surface.

**Table S3**

Relative energies (in kJ/mol) of the IS, TS and FS structures of the reaction:  $C_2H_5 + 78 H^{fcc} + 24 H^{tss} \rightarrow C_2H_6 + 77 H^{fcc} + 24 H^{tss}$  when ethyl species is located at terrace and edge sites of Pd<sub>79</sub> nanoparticle.

| site    | IS  | TS | FS  |
|---------|-----|----|-----|
| terrace | 0   | 16 | -98 |
| edge    | -31 | -2 | -80 |

## Structures of the obtained transition states

### Transition states on Pd(111) slabs

All Pd(111) slabs are hexagonal cells with 8.39×8.39 Å dimensions.

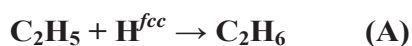

|    |                   |                  |                   |
|----|-------------------|------------------|-------------------|
| C  | 4.04325752607290  | 2.31675051486829 | 4.49485989575851  |
| C  | 5.42780313304679  | 2.33106673626886 | 3.88771477046444  |
| H  | 3.38008074607404  | 1.60048301360661 | 3.99290862131367  |
| H  | 3.52992963746283  | 3.28866734049503 | 4.49707148333653  |
| H  | 5.34578855716078  | 2.58273046548158 | 2.81485949802561  |
| H  | 6.08007644553040  | 3.08470599081664 | 4.35489061829885  |
| H  | 5.92567195686870  | 1.35504971713452 | 3.96355141349212  |
| H  | 3.75515606352429  | 1.25001894366306 | 5.64269559408264  |
| Pd | 0.02890215557717  | 0.04808766226785 | 6.85963996606994  |
| Pd | 2.83253910135301  | 0.04336365595836 | 6.80548885519102  |
| Pd | 5.63246665519054  | 0.03044601963765 | 6.86430499822081  |
| Pd | 9.79098790215931  | 2.47559189607361 | 6.87687222209505  |
| Pd | 11.20487811412488 | 4.90147668923974 | 6.86412555778878  |
| Pd | 4.22911616814175  | 2.47732563063569 | 6.70455308609573  |
| Pd | 5.62475998454773  | 4.91280147204401 | 6.85284671823861  |
| Pd | 7.03270454105008  | 2.47173733900461 | 6.85952879551997  |
| Pd | 8.41424492573934  | 4.89086726023025 | 6.85317416269771  |
| Pd | 1.41103000141396  | 0.82452645707513 | 9.14308821173664  |
| Pd | 4.20255873317366  | 0.83201750736633 | 9.12591365786186  |
| Pd | 7.00353867424868  | 0.82948965262960 | 9.15018040730723  |
| Pd | 2.81697529771538  | 3.24504488165770 | 9.12395622447490  |
| Pd | 4.20550041316405  | 5.67080519482376 | 9.14991865873646  |
| Pd | 5.57870452376092  | 3.24154845292893 | 9.09168784156523  |
| Pd | 6.99739664876287  | 5.67320361053610 | 9.13737615157885  |
| Pd | 8.39309323610388  | 3.25195651992226 | 9.15411650052329  |
| Pd | 9.79762795803233  | 5.66834201823496 | 9.15194218724539  |
| Pd | 2.79590021281160  | 1.61421374049411 | 11.41421482187893 |
| Pd | 5.59180042562322  | 1.61421374049411 | 11.41421482187893 |
| Pd | 8.38770063843479  | 1.61421374049411 | 11.41421482187893 |
| Pd | 4.19385031921741  | 4.03553435123529 | 11.41421482187893 |
| Pd | 5.59180042562322  | 6.45685496197637 | 11.41421482187893 |
| Pd | 6.98975053202903  | 4.03553435123529 | 11.41421482187893 |
| Pd | 8.38770063843485  | 6.45685496197637 | 11.41421482187893 |
| Pd | 9.78565074484060  | 4.03553435123529 | 11.41421482187893 |
| Pd | 11.18360085124635 | 6.45685496197637 | 11.41421482187893 |
| Pd | 0.00000000000000  | 0.00000000000000 | 13.69705778625463 |
| Pd | 2.79590021281163  | 0.00000000000000 | 13.69705778625463 |
| Pd | 5.59180042562319  | 0.00000000000000 | 13.69705778625463 |
| Pd | 1.39795010640581  | 2.42132061074118 | 13.69705778625463 |
| Pd | 2.79590021281160  | 4.84264122148232 | 13.69705778625463 |
| Pd | 4.19385031921744  | 2.42132061074118 | 13.69705778625463 |
| Pd | 5.59180042562322  | 4.84264122148232 | 13.69705778625463 |
| Pd | 6.98975053202900  | 2.42132061074118 | 13.69705778625463 |

|    |                  |                  |                   |
|----|------------------|------------------|-------------------|
| Pd | 8.38770063843479 | 4.84264122148232 | 13.69705778625463 |
| Pd | 1.39795010640584 | 0.80710687024708 | 15.97990075063048 |
| Pd | 4.19385031921741 | 0.80710687024708 | 15.97990075063048 |
| Pd | 6.98975053202903 | 0.80710687024708 | 15.97990075063048 |
| Pd | 2.79590021281160 | 3.22842748098816 | 15.97990075063048 |
| Pd | 4.19385031921747 | 5.64974809172934 | 15.97990075063048 |
| Pd | 5.59180042562316 | 3.22842748098816 | 15.97990075063048 |
| Pd | 6.98975053202897 | 5.64974809172934 | 15.97990075063048 |
| Pd | 8.38770063843479 | 3.22842748098816 | 15.97990075063048 |
| Pd | 9.78565074484066 | 5.64974809172934 | 15.97990075063048 |

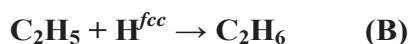

|    |                   |                  |                   |
|----|-------------------|------------------|-------------------|
| C  | 4.24949167341306  | 2.10836538783027 | 4.48005983341306  |
| C  | 5.48907493946611  | 2.40942253610872 | 3.66450814562456  |
| H  | 3.74945654656293  | 1.17704086593935 | 4.19254821690746  |
| H  | 3.51258645585047  | 2.92569915231079 | 4.46392382686019  |
| H  | 6.21933972681199  | 1.59015580149388 | 3.69939657610726  |
| H  | 5.19488897353890  | 2.55388441962878 | 2.61022178953809  |
| H  | 4.95218683042831  | 1.30496223998856 | 5.67516594026382  |
| H  | 5.98946496469902  | 3.32733130903414 | 3.99965136195534  |
| Pd | 0.01883255464245  | 0.02838597665321 | 6.86596626974603  |
| Pd | 2.79550420003740  | 0.01137849798293 | 6.88005609206291  |
| Pd | 5.61159797349819  | 0.01835328158600 | 6.81461223160982  |
| Pd | 9.78653051686470  | 2.45032532513796 | 6.85834662234482  |
| Pd | 11.19702500910512 | 4.88601389062103 | 6.84969861290727  |
| Pd | 4.19997602389667  | 2.45013612817770 | 6.68319345095547  |
| Pd | 5.61405482676368  | 4.88201749303992 | 6.86701429136104  |
| Pd | 7.02981650055183  | 2.45701729249875 | 6.87430014330707  |
| Pd | 8.40405535015127  | 4.87204538304482 | 6.86475505647992  |
| Pd | 1.40975498828014  | 0.82405816657663 | 9.15917635860968  |
| Pd | 4.21461709452919  | 0.82539161385423 | 9.12345219833894  |
| Pd | 7.00602697941508  | 0.82105395590384 | 9.14958167603310  |
| Pd | 2.83741152265522  | 3.23441514282228 | 9.08401734864024  |
| Pd | 4.20915130909736  | 5.66744319428907 | 9.15406547114307  |
| Pd | 5.59949485875249  | 3.23930451779956 | 9.11644860691001  |
| Pd | 7.00451339396731  | 5.66200872019254 | 9.16542630008460  |
| Pd | 8.41019729491562  | 3.24561007458925 | 9.16204787590915  |
| Pd | 9.80695692578752  | 5.66591959514938 | 9.14416783021997  |
| Pd | 2.81019138897854  | 1.62431981215211 | 11.40679501746723 |
| Pd | 5.59773866672845  | 1.62209332203418 | 11.40744783599265 |
| Pd | 8.39793584469211  | 1.62064034614140 | 11.43090975127038 |
| Pd | 4.20228758732351  | 4.03561698004007 | 11.40165458391215 |
| Pd | 5.60222314763575  | 6.46296847470447 | 11.43006928181006 |
| Pd | 6.99901794975132  | 4.03914559664618 | 11.43068739272610 |
| Pd | 8.40010210472772  | 6.46084446638760 | 11.42801348957058 |
| Pd | 9.80182833284390  | 4.03647777581841 | 11.42316164641974 |
| Pd | 11.19054060795263 | 6.46226691356076 | 11.42182310085551 |
| Pd | 0.00000000000000  | 0.00000000000000 | 13.69705778625463 |
| Pd | 2.79590021281163  | 0.00000000000000 | 13.69705778625463 |
| Pd | 5.59180042562319  | 0.00000000000000 | 13.69705778625463 |
| Pd | 1.39795010640581  | 2.42132061074118 | 13.69705778625463 |
| Pd | 2.79590021281160  | 4.84264122148232 | 13.69705778625463 |
| Pd | 4.19385031921744  | 2.42132061074118 | 13.69705778625463 |
| Pd | 5.59180042562322  | 4.84264122148232 | 13.69705778625463 |
| Pd | 6.98975053202900  | 2.42132061074118 | 13.69705778625463 |

|    |                  |                  |                   |
|----|------------------|------------------|-------------------|
| Pd | 8.38770063843479 | 4.84264122148232 | 13.69705778625463 |
| Pd | 1.39795010640584 | 0.80710687024708 | 15.97990075063048 |
| Pd | 4.19385031921741 | 0.80710687024708 | 15.97990075063048 |
| Pd | 6.98975053202903 | 0.80710687024708 | 15.97990075063048 |
| Pd | 2.79590021281163 | 3.22842748098821 | 15.97990075063048 |
| Pd | 4.19385031921744 | 5.64974809172940 | 15.97990075063048 |
| Pd | 5.59180042562319 | 3.22842748098821 | 15.97990075063048 |
| Pd | 6.98975053202900 | 5.64974809172940 | 15.97990075063048 |
| Pd | 8.38770063843482 | 3.22842748098821 | 15.97990075063048 |
| Pd | 9.78565074484063 | 5.64974809172940 | 15.97990075063048 |

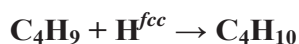

|    |                   |                  |                   |
|----|-------------------|------------------|-------------------|
| C  | 3.86207643650462  | 2.05531508467953 | 4.30958155814122  |
| C  | 5.25545962055592  | 1.95630897999585 | 3.69989270006751  |
| C  | 3.01837476730687  | 3.24743764090592 | 3.91047610230645  |
| C  | 6.08157465029814  | 3.23514299996028 | 3.63904580286813  |
| H  | 3.32103496352204  | 1.14096067658657 | 4.02030458552805  |
| H  | 5.09561379715004  | 1.59369562885518 | 2.66451206772193  |
| H  | 5.82201295384477  | 1.15675562517239 | 4.20556060466228  |
| H  | 3.49286775973881  | 1.28905543250316 | 5.63938863644886  |
| H  | 1.99988761929192  | 3.17979053262514 | 4.32189238127417  |
| H  | 2.93142807601071  | 3.26319194336739 | 2.80663470501460  |
| H  | 3.45000577090687  | 4.20886692309822 | 4.22230041452688  |
| H  | 7.05509037522970  | 3.04448963009237 | 3.16774156416706  |
| H  | 6.27722169562094  | 3.63596252926270 | 4.65523036401403  |
| H  | 5.57963361229111  | 4.02562155609219 | 3.06416438140210  |
| Pd | 0.01445642113511  | 0.01811832182319 | 6.86247114396873  |
| Pd | 2.81060128295732  | 0.00873282025865 | 6.83266042996361  |
| Pd | 5.62115866614140  | 0.00879034047547 | 6.86583336907601  |
| Pd | 9.78137301378369  | 2.44672243840644 | 6.88033273229579  |
| Pd | 11.19778750655227 | 4.87321233543789 | 6.86884408198199  |
| Pd | 4.22193296342074  | 2.44538940127045 | 6.61890900294109  |
| Pd | 5.61123746910087  | 4.87615941168672 | 6.84672569305841  |
| Pd | 7.02234738566566  | 2.43996825324216 | 6.86323244408506  |
| Pd | 8.40543370258370  | 4.86395289180360 | 6.86219548598543  |
| Pd | 1.40390809209149  | 0.81291105345682 | 9.14781903429189  |
| Pd | 4.19661479239743  | 0.82332774677922 | 9.11863687263096  |
| Pd | 6.99718176624951  | 0.81620508918542 | 9.15089192617983  |
| Pd | 2.81503872971062  | 3.22895690652533 | 9.11790813033828  |
| Pd | 4.20128451879970  | 5.65710342942531 | 9.14871512291425  |
| Pd | 5.56558303747897  | 3.22235514459686 | 9.07706105021495  |
| Pd | 6.98896072169332  | 5.65510851837261 | 9.14221705835915  |
| Pd | 8.38723729354408  | 3.23793757069185 | 9.15542906581907  |
| Pd | 9.79130963963848  | 5.65601476430330 | 9.15365221294606  |
| Pd | 2.79590021281163  | 1.61421374049405 | 11.41421482187893 |
| Pd | 5.59180042562319  | 1.61421374049405 | 11.41421482187893 |
| Pd | 8.38770063843476  | 1.61421374049405 | 11.41421482187893 |
| Pd | 4.19385031921741  | 4.03553435123529 | 11.41421482187893 |
| Pd | 5.59180042562319  | 6.45685496197622 | 11.41421482187893 |
| Pd | 6.98975053202903  | 4.03553435123529 | 11.41421482187893 |
| Pd | 8.38770063843482  | 6.45685496197622 | 11.41421482187893 |
| Pd | 9.78565074484060  | 4.03553435123529 | 11.41421482187893 |
| Pd | 11.18360085124638 | 6.45685496197622 | 11.41421482187893 |
| Pd | 0.00000000000000  | 0.00000000000000 | 13.69705778625463 |
| Pd | 2.79590021281163  | 0.00000000000000 | 13.69705778625463 |

|    |                  |                  |                   |
|----|------------------|------------------|-------------------|
| Pd | 5.59180042562319 | 0.00000000000000 | 13.69705778625463 |
| Pd | 1.39795010640581 | 2.42132061074118 | 13.69705778625463 |
| Pd | 2.79590021281160 | 4.84264122148232 | 13.69705778625463 |
| Pd | 4.19385031921744 | 2.42132061074118 | 13.69705778625463 |
| Pd | 5.59180042562322 | 4.84264122148232 | 13.69705778625463 |
| Pd | 6.98975053202900 | 2.42132061074118 | 13.69705778625463 |
| Pd | 8.38770063843479 | 4.84264122148232 | 13.69705778625463 |
| Pd | 1.39795010640581 | 0.80710687024703 | 15.97990075063048 |
| Pd | 4.19385031921738 | 0.80710687024703 | 15.97990075063048 |
| Pd | 6.98975053202900 | 0.80710687024703 | 15.97990075063048 |
| Pd | 2.79590021281163 | 3.22842748098811 | 15.97990075063048 |
| Pd | 4.19385031921744 | 5.64974809172919 | 15.97990075063048 |
| Pd | 5.59180042562319 | 3.22842748098811 | 15.97990075063048 |
| Pd | 6.98975053202900 | 5.64974809172919 | 15.97990075063048 |
| Pd | 8.38770063843482 | 3.22842748098811 | 15.97990075063048 |
| Pd | 9.78565074484063 | 5.64974809172919 | 15.97990075063048 |

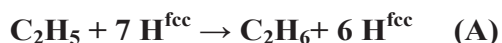

|    |                   |                  |                   |
|----|-------------------|------------------|-------------------|
| C  | 3.88257444581220  | 2.13717749693172 | 4.32052890900984  |
| C  | 5.24137965640260  | 1.82844063012514 | 3.74116208479409  |
| H  | 3.11438422359000  | 1.45813235483104 | 3.93069966309811  |
| H  | 3.53181951241432  | 3.16092566100877 | 4.16952065492475  |
| H  | 5.17052284246645  | 1.89710741028055 | 2.63939824677022  |
| H  | 6.01382678646188  | 2.53522336092976 | 4.07259397935519  |
| H  | 5.57809764593979  | 0.81248519299738 | 3.98524889687879  |
| H  | 3.24369507794316  | 1.37430921817980 | 5.63154681296998  |
| H  | 8.37827041378641  | 1.66620507746989 | 5.99826794514612  |
| H  | 4.25775179577076  | 4.18308947203817 | 6.00834092256345  |
| H  | 5.61946105238743  | 6.45303850586675 | 5.98659411620065  |
| H  | 8.42484575323717  | 6.42392259349989 | 6.03334672883316  |
| H  | 9.77198297896356  | 4.03210155303990 | 6.00679903316790  |
| H  | 11.17572425641173 | 6.49205877845571 | 5.99670432567590  |
| Pd | 0.01667013403533  | 0.01959329404724 | 6.77894548364437  |
| Pd | 2.82147561756181  | 0.01951131229820 | 6.79472976751893  |
| Pd | 5.60801962784190  | 0.03492678641405 | 6.82841997587849  |
| Pd | 1.41644949382527  | 2.42704848355941 | 6.81201056731361  |
| Pd | 11.19295781103616 | 4.86421914289734 | 6.80065645787606  |
| Pd | 4.22725691391477  | 2.42153576445438 | 6.54642406351620  |
| Pd | 5.64471704081038  | 4.85404825460976 | 6.82078632409792  |
| Pd | 6.99944777602089  | 2.44465787059822 | 6.83594481073325  |
| Pd | 8.38597231308639  | 4.83048918558060 | 6.82216610657408  |
| Pd | 1.40367616955705  | 0.80943936788822 | 9.12577272465382  |
| Pd | 4.19543280944936  | 0.82408220078756 | 9.10640322479050  |
| Pd | 6.99847482582856  | 0.81065594150583 | 9.13332394344997  |
| Pd | 2.80861329465381  | 3.22569193572329 | 9.09588948800793  |
| Pd | 4.20088688325870  | 5.65576793959743 | 9.12684805258657  |
| Pd | 5.56155436925553  | 3.21387659992246 | 9.05901231688761  |
| Pd | 6.99542762419023  | 5.65424130129590 | 9.13838533513994  |
| Pd | 8.38981510615448  | 3.22949160698258 | 9.14186081725110  |
| Pd | 9.79107551361302  | 5.65385324224426 | 9.14256315900966  |
| Pd | 2.79968788803518  | 1.61704975581752 | 11.41186935789910 |
| Pd | 5.58957889171095  | 1.61908176534220 | 11.40911711377505 |
| Pd | 8.38925601044769  | 1.61197527449941 | 11.43064730544507 |
| Pd | 4.19434814639555  | 4.03210266321926 | 11.40626736744709 |



|    |                   |                  |                   |
|----|-------------------|------------------|-------------------|
| Pd | 5.59207205631225  | 6.45809462519832 | 11.42579321060855 |
| Pd | 6.98042286052437  | 4.02995919156175 | 11.40576636457038 |
| Pd | 8.38672318486489  | 6.46190000268403 | 11.42810335890759 |
| Pd | 9.78565479437877  | 4.03417970996980 | 11.41761118289209 |
| Pd | 11.18570244523489 | 6.45825556141933 | 11.42047944908311 |
| Pd | 0.00000000000000  | 0.00000000000000 | 13.69705778625463 |
| Pd | 2.79590021281163  | 0.00000000000000 | 13.69705778625463 |
| Pd | 5.59180042562319  | 0.00000000000000 | 13.69705778625463 |
| Pd | 1.39795010640581  | 2.42132061074118 | 13.69705778625463 |
| Pd | 2.79590021281160  | 4.84264122148232 | 13.69705778625463 |
| Pd | 4.19385031921744  | 2.42132061074118 | 13.69705778625463 |
| Pd | 5.59180042562322  | 4.84264122148232 | 13.69705778625463 |
| Pd | 6.98975053202900  | 2.42132061074118 | 13.69705778625463 |
| Pd | 8.38770063843479  | 4.84264122148232 | 13.69705778625463 |
| Pd | 1.39795010640581  | 0.80710687024703 | 15.97990075063048 |
| Pd | 4.19385031921738  | 0.80710687024703 | 15.97990075063048 |
| Pd | 6.98975053202900  | 0.80710687024703 | 15.97990075063048 |
| Pd | 2.79590021281163  | 3.22842748098811 | 15.97990075063048 |
| Pd | 4.19385031921741  | 5.64974809172914 | 15.97990075063048 |
| Pd | 5.59180042562319  | 3.22842748098811 | 15.97990075063048 |
| Pd | 6.98975053202897  | 5.64974809172914 | 15.97990075063048 |
| Pd | 8.38770063843482  | 3.22842748098811 | 15.97990075063048 |
| Pd | 9.78565074484060  | 5.64974809172914 | 15.97990075063048 |

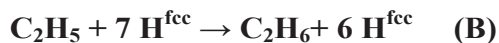

|    |                   |                  |                  |
|----|-------------------|------------------|------------------|
| C  | 4.49722941131729  | 1.96356943370794 | 4.38938635867658 |
| C  | 5.40696572211201  | 2.85416394974477 | 3.57681871279417 |
| H  | 4.59300756580411  | 0.90153779001979 | 4.14737267752106 |
| H  | 3.43611735114224  | 2.24437725014804 | 4.33776927162901 |
| H  | 5.13851455054728  | 2.74355514501833 | 2.51134650036147 |
| H  | 5.30096611159454  | 3.91306161946569 | 3.84109077408972 |
| H  | 6.46464280407647  | 2.58009914948157 | 3.68394192787466 |
| H  | 5.42574344916115  | 1.64570527828546 | 5.68712855517867 |
| H  | 8.36409622930440  | 1.65252122787238 | 5.98135636063629 |
| H  | 4.20025389607298  | 4.15173870874515 | 6.01238963225097 |
| H  | 5.61976043801000  | 6.45214287679222 | 6.00194298544100 |
| H  | 8.35410342772265  | 6.42393457174212 | 6.03488438344568 |
| H  | 9.74820389894564  | 4.01200695339640 | 5.98747546674844 |
| H  | 11.16919300543621 | 6.47754232027612 | 5.97612322328677 |
| Pd | 8.38780921701967  | 0.00821889753111 | 6.77422285908156 |
| Pd | 2.79062465189813  | 0.01423395607360 | 6.83760243638105 |
| Pd | 5.58321221785305  | 0.01335379510365 | 6.80109018376371 |
| Pd | 1.39132981431498  | 2.41245287273006 | 6.79798630261797 |
| Pd | 11.16117764885087 | 4.85503796437002 | 6.78251648210559 |
| Pd | 4.18168966713230  | 2.40733240541831 | 6.59481180440909 |
| Pd | 5.61100083411978  | 4.84451475067859 | 6.82942868048993 |
| Pd | 6.97155889914793  | 2.43197584081366 | 6.81200076782980 |
| Pd | 8.35821125108502  | 4.82088097584469 | 6.81022133293345 |
| Pd | 1.39597731190296  | 0.80647205732026 | 9.12804231771015 |
| Pd | 4.19973187365341  | 0.81482467550374 | 9.11259242831198 |
| Pd | 6.99291876547170  | 0.80318637771133 | 9.12601657397842 |
| Pd | 2.82808167221940  | 3.20869800183874 | 9.04953324253614 |
| Pd | 4.19159686597377  | 5.64978274915230 | 9.12395840867023 |
| Pd | 5.58694507888740  | 3.21770973975963 | 9.10394998777566 |
| Pd | 6.99361773687698  | 5.64577134226059 | 9.14443157426521 |

|    |                   |                  |                   |
|----|-------------------|------------------|-------------------|
| Pd | 8.39062831310780  | 3.22184131937632 | 9.12739366661596  |
| Pd | 9.78753431688932  | 5.64516530218238 | 9.12827437544327  |
| Pd | 2.79919881525971  | 1.61598125674483 | 11.40626545843342 |
| Pd | 5.59067698102881  | 1.61370112156909 | 11.41558369130549 |
| Pd | 8.38989180533866  | 1.60975709738403 | 11.42650185530513 |
| Pd | 4.19354413699282  | 4.02859211105195 | 11.40541526114041 |
| Pd | 5.59177991196710  | 6.45439934056861 | 11.42732070213079 |
| Pd | 6.99283302327465  | 4.03109252419637 | 11.41554059845297 |
| Pd | 8.39131100776011  | 6.45775701203187 | 11.42804840311261 |
| Pd | 9.79572255876518  | 4.02763722454183 | 11.40016371400530 |
| Pd | 11.18579295588929 | 6.45362828077305 | 11.41549268216811 |
| Pd | 0.00000000000000  | 0.00000000000000 | 13.69705778625463 |
| Pd | 2.79590021281163  | 0.00000000000000 | 13.69705778625463 |
| Pd | 5.59180042562319  | 0.00000000000000 | 13.69705778625463 |
| Pd | 1.39795010640581  | 2.42132061074118 | 13.69705778625463 |
| Pd | 2.79590021281160  | 4.84264122148232 | 13.69705778625463 |
| Pd | 4.19385031921744  | 2.42132061074118 | 13.69705778625463 |
| Pd | 5.59180042562322  | 4.84264122148232 | 13.69705778625463 |
| Pd | 6.98975053202900  | 2.42132061074118 | 13.69705778625463 |
| Pd | 8.38770063843479  | 4.84264122148232 | 13.69705778625463 |
| Pd | 1.39795010640581  | 0.80710687024703 | 15.97990075063048 |
| Pd | 4.19385031921738  | 0.80710687024703 | 15.97990075063048 |
| Pd | 6.98975053202900  | 0.80710687024703 | 15.97990075063048 |
| Pd | 2.79590021281157  | 3.22842748098800 | 15.97990075063048 |
| Pd | 4.19385031921738  | 5.64974809172909 | 15.97990075063048 |
| Pd | 5.59180042562313  | 3.22842748098800 | 15.97990075063048 |
| Pd | 6.98975053202894  | 5.64974809172909 | 15.97990075063048 |
| Pd | 8.38770063843476  | 3.22842748098800 | 15.97990075063048 |
| Pd | 9.78565074484057  | 5.64974809172909 | 15.97990075063048 |

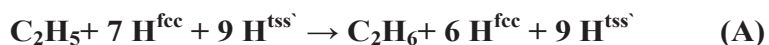

|    |                   |                  |                  |
|----|-------------------|------------------|------------------|
| C  | 3.89404525953829  | 2.21271553565291 | 3.89739551827586 |
| C  | 5.25773600860493  | 1.90560589890333 | 3.32656902681786 |
| H  | 3.13000696961799  | 1.53385814172145 | 3.50095390950129 |
| H  | 3.54651208225640  | 3.23704289227451 | 3.74247660859131 |
| H  | 5.19452796998332  | 1.97415452726087 | 2.22418634874249 |
| H  | 6.02800804333636  | 2.61299083912786 | 3.66119078304934 |
| H  | 5.59528216284591  | 0.88960806439455 | 3.57067805923696 |
| H  | 3.18977028736897  | 1.44032805177043 | 5.23054187543585 |
| H  | 8.38719388186366  | 1.69046724506998 | 5.58698533503597 |
| H  | 4.26939662291459  | 4.20554795255643 | 5.61873753233669 |
| H  | 5.63183957195166  | 6.48376289786334 | 5.56431115047007 |
| H  | 8.45157229053652  | 6.44579692056062 | 5.63834475618993 |
| H  | 9.78716082730254  | 4.07824799192477 | 5.60100587200682 |
| H  | 11.19405000459130 | 6.52561257211718 | 5.58445492368201 |
| H  | 9.77855947424306  | 2.45513205943933 | 8.18070743761408 |
| H  | 4.18809085990410  | 2.44123434241308 | 8.10573070070954 |
| H  | 7.03993917302942  | 2.42416746936875 | 8.17235313181426 |
| H  | 11.17622650800051 | 4.87783371687503 | 8.24266562542207 |
| H  | 8.38637357845302  | 0.01450567989718 | 8.22006587295677 |
| H  | 5.57921873108397  | 4.90314276588594 | 8.21476895368051 |
| H  | 2.79666527120433  | 0.02352081641872 | 8.22923067170198 |
| H  | 8.41403998583235  | 4.87291977476375 | 8.23147742058377 |
| H  | 9.79409334179515  | 7.25160337545752 | 8.20352889691325 |
| Pd | 8.42246104550921  | 0.04921632273207 | 6.35654143207123 |

|    |                   |                  |                   |
|----|-------------------|------------------|-------------------|
| Pd | 2.83613383393948  | 0.04740443850030 | 6.36642893374418  |
| Pd | 5.62125764045940  | 0.08575911863374 | 6.40484291096692  |
| Pd | 1.44288875920260  | 2.44493486951606 | 6.35983557831134  |
| Pd | 11.20486384064241 | 4.90634658748187 | 6.38467118667286  |
| Pd | 4.22904168872648  | 2.45172118162000 | 6.13435788700400  |
| Pd | 5.67064651024397  | 4.88202469192674 | 6.41561799009306  |
| Pd | 7.00355215597100  | 2.48482160489724 | 6.42286086660357  |
| Pd | 8.39585833824269  | 4.85150113101379 | 6.42315473594023  |
| Pd | 1.40015586525826  | 0.83478521722014 | 9.05794959143163  |
| Pd | 4.20139329837354  | 0.83943062404908 | 9.02808767719768  |
| Pd | 6.99144680451248  | 0.82683764854676 | 9.06899731925626  |
| Pd | 2.80564136578801  | 3.24480030643482 | 9.03182565787789  |
| Pd | 4.19309897461357  | 5.67594045646658 | 9.09671143336197  |
| Pd | 5.58684080689636  | 3.24415895523224 | 8.96138085191060  |
| Pd | 6.99563520161265  | 5.67369593685292 | 9.06485558258038  |
| Pd | 8.39672184187876  | 3.25242163866940 | 9.08337532240029  |
| Pd | 9.79305598720003  | 5.67275643127158 | 9.11963675166991  |
| Pd | 2.80217418455093  | 1.62613456883608 | 11.39273012158281 |
| Pd | 5.59143735976517  | 1.63219134002778 | 11.38670327719474 |
| Pd | 8.39047127186468  | 1.62406390614415 | 11.40690920583787 |
| Pd | 4.20196729586587  | 4.03775501336956 | 11.38876225109022 |
| Pd | 5.59692396064552  | 6.47026603832547 | 11.40812619520153 |
| Pd | 6.98010988676963  | 4.04114177229800 | 11.39035281424737 |
| Pd | 8.38629414951495  | 6.47689138271476 | 11.40661712974865 |
| Pd | 9.79498318298606  | 4.03832340606623 | 11.41282886697445 |
| Pd | 11.18804481942561 | 6.47227165283089 | 11.42428437307422 |
| Pd | 0.00000000000000  | 0.00000000000000 | 13.69705778625463 |
| Pd | 2.79590021281163  | 0.00000000000000 | 13.69705778625463 |
| Pd | 5.59180042562319  | 0.00000000000000 | 13.69705778625463 |
| Pd | 1.39795010640581  | 2.42132061074118 | 13.69705778625463 |
| Pd | 2.79590021281160  | 4.84264122148232 | 13.69705778625463 |
| Pd | 4.19385031921744  | 2.42132061074118 | 13.69705778625463 |
| Pd | 5.59180042562322  | 4.84264122148232 | 13.69705778625463 |
| Pd | 6.98975053202900  | 2.42132061074118 | 13.69705778625463 |
| Pd | 8.38770063843479  | 4.84264122148232 | 13.69705778625463 |
| Pd | 1.39795010640581  | 0.80710687024703 | 15.97990075063048 |
| Pd | 4.19385031921738  | 0.80710687024703 | 15.97990075063048 |
| Pd | 6.98975053202900  | 0.80710687024703 | 15.97990075063048 |
| Pd | 2.79590021281160  | 3.22842748098806 | 15.97990075063048 |
| Pd | 4.19385031921747  | 5.64974809172914 | 15.97990075063048 |
| Pd | 5.59180042562316  | 3.22842748098806 | 15.97990075063048 |
| Pd | 6.98975053202903  | 5.64974809172914 | 15.97990075063048 |
| Pd | 8.38770063843479  | 3.22842748098806 | 15.97990075063048 |
| Pd | 9.78565074484066  | 5.64974809172914 | 15.97990075063048 |

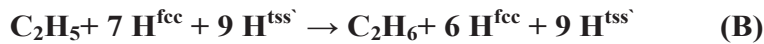

|   |                  |                  |                  |
|---|------------------|------------------|------------------|
| C | 4.17635321900266 | 2.04521020869354 | 3.95733450960564 |
| C | 5.07026152465501 | 2.86156181249911 | 3.05405825949856 |
| H | 4.14564377364757 | 0.98343234247460 | 3.70012519834985 |
| H | 3.14645133402378 | 2.42536616815182 | 4.00947173815250 |
| H | 4.64430645486046 | 2.83837272626438 | 2.03530483843412 |
| H | 5.13360090077404 | 3.91213295554705 | 3.36229367553970 |
| H | 6.08911393673298 | 2.45818148415567 | 2.99690251383379 |
| H | 5.24880879980880 | 1.57575524401680 | 5.19380121612219 |
| H | 8.35972309177656 | 1.68792561973618 | 5.56924858672475 |

|    |                   |                  |                   |
|----|-------------------|------------------|-------------------|
| H  | 4.18620978794672  | 4.18663568676118 | 5.62809534218769  |
| H  | 5.60564626879498  | 6.49057379163573 | 5.58968844518616  |
| H  | 8.33479813004421  | 6.43794989913039 | 5.63334822546526  |
| H  | 9.73126846943800  | 4.06148399689261 | 5.59604457842617  |
| H  | 11.16579949596039 | 6.51272918298972 | 5.54409463377138  |
| H  | 9.75708136781600  | 2.44244654103111 | 8.19771301972171  |
| H  | 4.19447449122829  | 2.43497357510661 | 8.11927337825207  |
| H  | 7.00822667790003  | 2.42739363039165 | 8.12983181592853  |
| H  | 11.17786597533467 | 4.89131898873777 | 8.23488165176452  |
| H  | 8.38143109276448  | 0.00899923537222 | 8.20991887992775  |
| H  | 5.58408337788495  | 4.87736173357305 | 8.22039879402363  |
| H  | 6.99002516721794  | 7.26108943072620 | 8.21359941786390  |
| H  | 8.40501238278032  | 4.86757856696124 | 8.22645027262741  |
| H  | 5.59920864586961  | 0.00889801953438 | 8.19279749527508  |
| Pd | 8.37506191807346  | 0.04765094752131 | 6.34570416410108  |
| Pd | 2.77653835140816  | 0.06503036296471 | 6.41957658664267  |
| Pd | 5.56497397322826  | 0.06708075306097 | 6.32677150522894  |
| Pd | 9.77405747443345  | 2.44896715819366 | 6.39472347648602  |
| Pd | 11.14362060761989 | 4.90063093545411 | 6.37978368110528  |
| Pd | 4.16531251532675  | 2.44275963446916 | 6.18700503904077  |
| Pd | 5.60802845685218  | 4.88647598963986 | 6.41782333066909  |
| Pd | 6.94555242843303  | 2.47140487099725 | 6.35441975289273  |
| Pd | 8.33680872876116  | 4.84823429756670 | 6.41939353487343  |
| Pd | 1.39640156384778  | 0.82568975740981 | 9.05297182758102  |
| Pd | 4.19799830879200  | 0.82932573954712 | 9.02952344490461  |
| Pd | 6.98848207506687  | 0.82597693585711 | 9.05945679477669  |
| Pd | 2.80466905187804  | 3.24170821725795 | 8.99122491470348  |
| Pd | 4.19079173384119  | 5.67161784048414 | 9.09336770946080  |
| Pd | 5.59174709803815  | 3.23726324023915 | 9.00604136029967  |
| Pd | 6.99129110519064  | 5.66142459726517 | 9.08506051137785  |
| Pd | 8.37825012116381  | 3.24503721667381 | 9.07378898918846  |
| Pd | 9.78801488931524  | 5.67646278050223 | 9.09362421130269  |
| Pd | 2.79814597862675  | 1.62512521447664 | 11.38691755553734 |
| Pd | 5.58886657364861  | 1.62390866433676 | 11.38929837118774 |
| Pd | 8.38742920289143  | 1.61977579755871 | 11.40321942974406 |
| Pd | 4.19292340021766  | 4.03431310597557 | 11.38856083217125 |
| Pd | 5.59335521013025  | 6.46710279136388 | 11.40981607023316 |
| Pd | 6.98065539229834  | 4.03574357037941 | 11.40217399474376 |
| Pd | 8.38555186294815  | 6.47201916518986 | 11.40696544465800 |
| Pd | 9.79423052185162  | 4.03528581462056 | 11.39408962545026 |
| Pd | 11.18411929015097 | 6.46892113894984 | 11.41896827644021 |
| Pd | 0.00000000000000  | 0.00000000000000 | 13.69705778625463 |
| Pd | 2.79590021281163  | 0.00000000000000 | 13.69705778625463 |
| Pd | 5.59180042562319  | 0.00000000000000 | 13.69705778625463 |
| Pd | 1.39795010640581  | 2.42132061074118 | 13.69705778625463 |
| Pd | 2.79590021281160  | 4.84264122148232 | 13.69705778625463 |
| Pd | 4.19385031921744  | 2.42132061074118 | 13.69705778625463 |
| Pd | 5.59180042562322  | 4.84264122148232 | 13.69705778625463 |
| Pd | 6.98975053202900  | 2.42132061074118 | 13.69705778625463 |
| Pd | 8.38770063843479  | 4.84264122148232 | 13.69705778625463 |
| Pd | 1.39795010640584  | 0.80710687024708 | 15.97990075063048 |
| Pd | 4.19385031921741  | 0.80710687024708 | 15.97990075063048 |
| Pd | 6.98975053202903  | 0.80710687024708 | 15.97990075063048 |
| Pd | 2.79590021281163  | 3.22842748098821 | 15.97990075063048 |
| Pd | 4.19385031921744  | 5.64974809172940 | 15.97990075063048 |
| Pd | 5.59180042562319  | 3.22842748098821 | 15.97990075063048 |
| Pd | 6.98975053202900  | 5.64974809172940 | 15.97990075063048 |

|    |                  |                  |                   |
|----|------------------|------------------|-------------------|
| Pd | 8.38770063843482 | 3.22842748098821 | 15.97990075063048 |
| Pd | 9.78565074484063 | 5.64974809172940 | 15.97990075063048 |

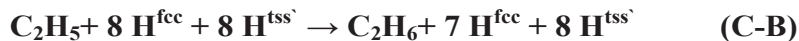

|    |                   |                  |                   |
|----|-------------------|------------------|-------------------|
| C  | 4.65003294142942  | 2.04981176433938 | 3.87111158877348  |
| C  | 5.94201004919835  | 2.26479873899408 | 3.11875702168649  |
| H  | 4.18707613262343  | 1.07828219603302 | 3.68874836283659  |
| H  | 3.93133756344775  | 2.86029583006291 | 3.71308123280703  |
| H  | 5.69782794129170  | 2.34859216774242 | 2.04445352531190  |
| H  | 6.45140717451094  | 3.19097330345516 | 3.41419249191016  |
| H  | 6.64323717723709  | 1.42994322741808 | 3.23989569919621  |
| H  | 2.63698789972561  | 1.57981493074993 | 5.59788917861294  |
| H  | 8.31256993543733  | 1.64993337593437 | 5.60074964070314  |
| H  | 4.16987189670214  | 4.19261763871417 | 5.60002038091828  |
| H  | 5.57726749139108  | 6.42772949804685 | 5.60120181306154  |
| H  | 8.34261405162062  | 6.41608908903105 | 5.62170195600589  |
| H  | 9.72057106441732  | 4.04508910114197 | 5.59316958930757  |
| H  | 11.12600007360274 | 6.46560914495442 | 5.57242986120163  |
| H  | 9.79193938431790  | 2.43569221312479 | 8.26686281939495  |
| H  | 5.47176835297727  | 1.59564030136861 | 5.29281594816764  |
| H  | 6.96672108069498  | 2.41881649187103 | 8.21132579801258  |
| H  | 11.17492398955735 | 4.84768444667474 | 8.25615606925843  |
| H  | 8.37576185275244  | 0.00219363362007 | 8.22478749961642  |
| H  | 5.56735840512036  | 4.83633037839103 | 8.25333837787943  |
| H  | 2.81541315111095  | 0.02524038692233 | 8.26917857176391  |
| H  | 8.40430545776067  | 4.85942049811056 | 8.22104751472478  |
| H  | 5.56937641864066  | 0.02104470965114 | 8.22981015682795  |
| Pd | 8.35261164118990  | 0.00591787461681 | 6.36047804999644  |
| Pd | 2.75789969258900  | 0.00079346781107 | 6.42484863279348  |
| Pd | 5.54857446793140  | 0.02640765094370 | 6.37843832567417  |
| Pd | 9.72542025945557  | 2.43468432827826 | 6.41772354056061  |
| Pd | 11.12936582692021 | 4.85501087366510 | 6.40030370128046  |
| Pd | 4.18571658015560  | 2.42725585520367 | 6.10474307807777  |
| Pd | 5.58202663609049  | 4.83895900852322 | 6.45161385134410  |
| Pd | 6.92697555829289  | 2.44315306734079 | 6.43352389699783  |
| Pd | 8.31442678265901  | 4.82265571193873 | 6.41768898519028  |
| Pd | 1.39067946103103  | 0.81370899661189 | 9.08192133604214  |
| Pd | 4.19369459075106  | 0.85415455976279 | 9.03242646056665  |
| Pd | 6.98027878775554  | 0.81091314851541 | 9.08751167399511  |
| Pd | 2.83904931329901  | 3.21077851183545 | 8.98119220382320  |
| Pd | 4.18160301918113  | 5.65810136310863 | 9.10113279759621  |
| Pd | 5.55388183052614  | 3.21262281819879 | 9.01599126751704  |
| Pd | 6.98467689081766  | 5.65440684005020 | 9.07021118483805  |
| Pd | 8.37740213729736  | 3.23644650291614 | 9.06829098205968  |
| Pd | 9.78212627264119  | 5.66292071035508 | 9.09515537337980  |
| Pd | 2.79743355996587  | 1.62304097922270 | 11.38545760517908 |
| Pd | 5.58349982163994  | 1.62275095045550 | 11.39076395895318 |
| Pd | 8.38313577555786  | 1.62054728396007 | 11.41323795650698 |
| Pd | 4.19056272322400  | 4.02934869893403 | 11.38682156465496 |
| Pd | 5.59174474636719  | 6.45900815943267 | 11.41510848373031 |
| Pd | 6.98014551489299  | 4.03504164074669 | 11.40237905181712 |
| Pd | 8.38174699738476  | 6.46664559193086 | 11.40614391230942 |
| Pd | 9.79181996023096  | 4.03122351020160 | 11.39295018484450 |
| Pd | 11.17912400945421 | 6.46189526834097 | 11.42672994570412 |
| Pd | 0.00000000000000  | 0.00000000000000 | 13.69705778625463 |

|    |                  |                  |                   |
|----|------------------|------------------|-------------------|
| Pd | 2.79590021281163 | 0.00000000000000 | 13.69705778625463 |
| Pd | 5.59180042562319 | 0.00000000000000 | 13.69705778625463 |
| Pd | 1.39795010640581 | 2.42132061074118 | 13.69705778625463 |
| Pd | 2.79590021281160 | 4.84264122148232 | 13.69705778625463 |
| Pd | 4.19385031921744 | 2.42132061074118 | 13.69705778625463 |
| Pd | 5.59180042562322 | 4.84264122148232 | 13.69705778625463 |
| Pd | 6.98975053202900 | 2.42132061074118 | 13.69705778625463 |
| Pd | 8.38770063843479 | 4.84264122148232 | 13.69705778625463 |
| Pd | 1.39795010640581 | 0.80710687024703 | 15.97990075063048 |
| Pd | 4.19385031921738 | 0.80710687024703 | 15.97990075063048 |
| Pd | 6.98975053202900 | 0.80710687024703 | 15.97990075063048 |
| Pd | 2.79590021281160 | 3.22842748098806 | 15.97990075063048 |
| Pd | 4.19385031921747 | 5.64974809172914 | 15.97990075063048 |
| Pd | 5.59180042562316 | 3.22842748098806 | 15.97990075063048 |
| Pd | 6.98975053202903 | 5.64974809172914 | 15.97990075063048 |
| Pd | 8.38770063843479 | 3.22842748098806 | 15.97990075063048 |
| Pd | 9.78565074484066 | 5.64974809172914 | 15.97990075063048 |

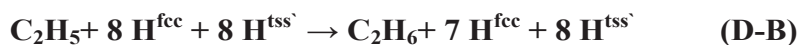

|    |                   |                  |                  |
|----|-------------------|------------------|------------------|
| C  | 4.66597279120833  | 2.04045200476379 | 3.89330470366913 |
| C  | 5.81003356795512  | 2.69699189527366 | 3.15983908586587 |
| H  | 4.54525743660177  | 0.97598795866571 | 3.67705658292170 |
| H  | 3.71317619898085  | 2.55739513128230 | 3.73600678462014 |
| H  | 5.56849574164671  | 2.70315413619236 | 2.08162029543754 |
| H  | 5.96015898676109  | 3.73941772893385 | 3.46829707865670 |
| H  | 6.75846924131965  | 2.15983393230014 | 3.28587341088204 |
| H  | 2.63610269734409  | 1.56660341603400 | 5.60283089737277 |
| H  | 8.31841702306594  | 1.64325633686846 | 5.59027607139127 |
| H  | 4.15419082603113  | 4.19208978663504 | 5.58658530171720 |
| H  | 5.57189083662484  | 6.43924524715953 | 5.59206411354704 |
| H  | 8.43057524385968  | 6.46763075525574 | 5.72546935776619 |
| H  | 9.72020913269966  | 4.05760322148854 | 5.59244167914105 |
| H  | 11.05358534079988 | 6.53147664904343 | 5.67216385437219 |
| H  | 1.37766620392702  | 2.41118445031657 | 8.25549207111179 |
| H  | 4.19379880405212  | 2.38501769672275 | 8.11464669903083 |
| H  | 7.00021713874871  | 2.38095669516448 | 8.19834974548194 |
| H  | 11.14883303806887 | 4.87526805759566 | 8.25625959234485 |
| H  | 8.35633251870800  | 0.01114075280103 | 8.23502729630700 |
| H  | 5.56913270879038  | 4.85887843707292 | 8.23372144704772 |
| H  | 2.80415632608885  | 0.02001710514791 | 8.27554129744540 |
| H  | 8.42634674024334  | 4.85752282066325 | 8.23547326962865 |
| H  | 5.47616275963741  | 1.58218912618148 | 5.31922866133818 |
| Pd | 4.16164757644691  | 7.27515114891945 | 6.37565024822791 |
| Pd | 6.95081051078541  | 7.26207084887669 | 6.43055607635560 |
| Pd | 5.55443414249565  | 0.04627930335723 | 6.59592610424127 |
| Pd | 9.72392197695244  | 2.44077001105116 | 6.39696357960526 |
| Pd | 11.12742282331022 | 4.87028237931361 | 6.40037625173287 |
| Pd | 4.19453644899264  | 2.42605317886313 | 6.11376334354546 |
| Pd | 5.58332218916204  | 4.84452621531413 | 6.43030351887903 |
| Pd | 6.93575164158334  | 2.44870189286782 | 6.41577396753684 |
| Pd | 8.31942340813157  | 4.83262792585285 | 6.43818784118439 |
| Pd | 1.38357158203665  | 0.80574226340500 | 9.09155162199743 |
| Pd | 4.21492990273151  | 0.80511798750765 | 9.03749312248425 |
| Pd | 6.95379483956918  | 0.79019228660900 | 9.06454008746601 |
| Pd | 2.80772768761568  | 3.21987426792338 | 9.00112855454189 |



|    |                   |                  |                   |
|----|-------------------|------------------|-------------------|
| Pd | 4.17775572778353  | 5.65642242688086 | 9.09722635519268  |
| Pd | 5.57836473865217  | 3.21673584050678 | 9.01655724247727  |
| Pd | 6.98712054384458  | 5.64844561840368 | 9.06837794994892  |
| Pd | 8.37550658336257  | 3.23005760108684 | 9.07009997929462  |
| Pd | 9.78126390048203  | 5.69316339389956 | 9.07310401608726  |
| Pd | 2.79482100188240  | 1.61912487659209 | 11.39655666578003 |
| Pd | 5.58565195967789  | 1.61707625208980 | 11.38900534961495 |
| Pd | 8.37934312339805  | 1.61682311740038 | 11.41064028384895 |
| Pd | 4.19033828626031  | 4.02910240839103 | 11.39502470650664 |
| Pd | 5.59063577650187  | 6.45497459604609 | 11.41491148816340 |
| Pd | 6.97871159940512  | 4.03133488698623 | 11.40153573516002 |
| Pd | 8.38308239238740  | 6.46490107172678 | 11.39882962092545 |
| Pd | 9.79048835371789  | 4.03318696269571 | 11.38756350968456 |
| Pd | 11.17734810578067 | 6.46160362581742 | 11.41720549216733 |
| Pd | 0.00000000000000  | 0.00000000000000 | 13.69705778625463 |
| Pd | 2.79590021281163  | 0.00000000000000 | 13.69705778625463 |
| Pd | 5.59180042562319  | 0.00000000000000 | 13.69705778625463 |
| Pd | 1.39795010640581  | 2.42132061074118 | 13.69705778625463 |
| Pd | 2.79590021281160  | 4.84264122148232 | 13.69705778625463 |
| Pd | 4.19385031921744  | 2.42132061074118 | 13.69705778625463 |
| Pd | 5.59180042562322  | 4.84264122148232 | 13.69705778625463 |
| Pd | 6.98975053202900  | 2.42132061074118 | 13.69705778625463 |
| Pd | 8.38770063843479  | 4.84264122148232 | 13.69705778625463 |
| Pd | 1.39795010640584  | 0.80710687024708 | 15.97990075063048 |
| Pd | 4.19385031921741  | 0.80710687024708 | 15.97990075063048 |
| Pd | 6.98975053202903  | 0.80710687024708 | 15.97990075063048 |
| Pd | 2.79590021281163  | 3.22842748098821 | 15.97990075063048 |
| Pd | 4.19385031921744  | 5.64974809172940 | 15.97990075063048 |
| Pd | 5.59180042562319  | 3.22842748098821 | 15.97990075063048 |
| Pd | 6.98975053202900  | 5.64974809172940 | 15.97990075063048 |
| Pd | 8.38770063843482  | 3.22842748098821 | 15.97990075063048 |
| Pd | 9.78565074484063  | 5.64974809172940 | 15.97990075063048 |

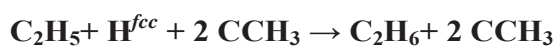

|    |                  |                  |                  |
|----|------------------|------------------|------------------|
| C  | 5.59560591909545 | 6.48240794893057 | 5.63876048989933 |
| C  | 9.76642511745002 | 4.08283223758862 | 5.61620511507752 |
| C  | 5.60726878670819 | 6.48140308519624 | 4.14793965081050 |
| C  | 9.73861978862968 | 4.11738784052531 | 4.12662175414963 |
| C  | 4.53378238096101 | 2.20394567994134 | 4.45761016494149 |
| C  | 5.77720062591621 | 1.92045946170103 | 3.62796864514796 |
| H  | 1.39593397324791 | 0.24740368836927 | 3.75659064719336 |
| H  | 4.72555076579560 | 5.95404538262816 | 3.74990684213215 |
| H  | 6.51067528525492 | 5.98031864707582 | 3.76564702248271 |
| H  | 8.82001370948838 | 3.64860845919700 | 3.73997861355236 |
| H  | 2.21105670709271 | 3.57506494646800 | 3.70208109592548 |
| H  | 9.77578084717089 | 5.15637116002226 | 3.76243921563674 |
| H  | 4.24039732060063 | 3.25807692183101 | 4.37972972185994 |
| H  | 3.69830882510997 | 1.54260946202553 | 4.20885617968442 |
| H  | 6.10676883763323 | 0.87557091771878 | 3.70825345750464 |
| H  | 5.56124542864449 | 2.13089679784552 | 2.56661835681280 |
| H  | 5.24635834025633 | 1.45479941330267 | 5.73387460008563 |
| H  | 6.61957492153700 | 2.55561623876873 | 3.93624050236978 |
| Pd | 8.37956118191027 | 0.03335774921223 | 6.75732607126446 |
| Pd | 2.80096686555645 | 0.02155632533336 | 6.78345849626218 |
| Pd | 5.60937783222985 | 0.02488290058991 | 6.84987338079496 |

|    |                   |                  |                   |
|----|-------------------|------------------|-------------------|
| Pd | 9.78337520297501  | 2.45495823885762 | 6.73604686038046  |
| Pd | 11.18272548997696 | 4.87170937684431 | 6.74630707049091  |
| Pd | 4.22567435398934  | 2.43643145155348 | 6.66878182953171  |
| Pd | 5.60160886750160  | 4.86483572897634 | 6.77769895597490  |
| Pd | 7.00248968921046  | 2.43518315585362 | 6.88626579513915  |
| Pd | 8.39294548378633  | 4.86428251099941 | 6.78672209649277  |
| Pd | 1.40729245485030  | 0.82263641305087 | 9.11663417265831  |
| Pd | 4.20359423283691  | 0.82109255664353 | 9.11076482044346  |
| Pd | 7.01209084367364  | 0.80713913682499 | 9.14427200016865  |
| Pd | 2.83367858065796  | 3.22418490208830 | 9.05552681395111  |
| Pd | 4.20047310322374  | 5.65856075267604 | 9.11570665310499  |
| Pd | 5.59595119609387  | 3.23979581583254 | 9.11304221159144  |
| Pd | 7.00526721329662  | 5.65664233063082 | 9.13333857707472  |
| Pd | 8.41167419527380  | 3.23617095850784 | 9.13964208587971  |
| Pd | 9.80394507958794  | 5.65255704282062 | 9.13429120842768  |
| Pd | 2.80843592791235  | 1.61737790143375 | 11.39698252828325 |
| Pd | 5.59808915704437  | 1.61756706041693 | 11.43337574125637 |
| Pd | 8.39923844062461  | 1.61563743198825 | 11.42447286910770 |
| Pd | 4.20248764335407  | 4.03438711929437 | 11.39703787722044 |
| Pd | 5.59910605011245  | 6.46016326932840 | 11.43607796435065 |
| Pd | 6.99991198559551  | 4.03818148612238 | 11.42264906546091 |
| Pd | 8.39698588048164  | 6.45736029297250 | 11.42026925650672 |
| Pd | 9.80190836985038  | 4.03103398090848 | 11.40569435538486 |
| Pd | 11.19352428918198 | 6.45669759630048 | 11.42124135113567 |
| Pd | 0.00000000000000  | 0.00000000000000 | 13.69774263914397 |
| Pd | 2.79562062279034  | 0.00000000000000 | 13.69774263914397 |
| Pd | 5.59208001564448  | 0.00000000000000 | 13.69774263914397 |
| Pd | 1.39781031139517  | 2.42107847868010 | 13.69774263914397 |
| Pd | 2.79604000782224  | 4.84288335354340 | 13.69774263914397 |
| Pd | 4.19343093418550  | 2.42107847868010 | 13.69774263914397 |
| Pd | 5.59166063061258  | 4.84288335354340 | 13.69774263914397 |
| Pd | 6.98989032703965  | 2.42107847868010 | 13.69774263914397 |
| Pd | 8.38812002346672  | 4.84288335354340 | 13.69774263914397 |
| Pd | 1.39781031139517  | 0.80702615956003 | 15.98035731922317 |
| Pd | 4.19343093418550  | 0.80702615956003 | 15.98035731922317 |
| Pd | 6.98989032703965  | 0.80702615956003 | 15.98035731922317 |
| Pd | 2.79562062279036  | 3.22810463824008 | 15.98035731922317 |
| Pd | 4.19385031921741  | 5.64990951310333 | 15.98035731922317 |
| Pd | 5.59124124558064  | 3.22810463824008 | 15.98035731922317 |
| Pd | 6.98947094200774  | 5.64990951310333 | 15.98035731922317 |
| Pd | 8.38770063843479  | 3.22810463824008 | 15.98035731922317 |
| Pd | 9.78593033486189  | 5.64990951310333 | 15.98035731922317 |

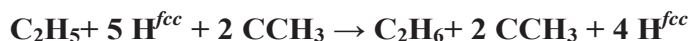

|   |                  |                  |                  |
|---|------------------|------------------|------------------|
| C | 4.52285893911039 | 1.87589851181763 | 4.36209612412083 |
| C | 5.41802402202525 | 2.71963291505902 | 3.48304606287372 |
| C | 5.62731262184921 | 6.49923530811842 | 5.58298369753191 |
| C | 9.68948245978247 | 4.06384046451220 | 5.56841065372342 |
| C | 5.65342768103955 | 6.55162445803317 | 4.09670201557344 |
| C | 9.61575527918995 | 4.12706684191455 | 4.08394431609066 |
| H | 4.64468269756443 | 0.80374516296538 | 4.18725847083421 |
| H | 3.45877030763739 | 2.12549305126201 | 4.27024007673104 |
| H | 5.14287274508130 | 2.56568683161592 | 2.42493190871593 |
| H | 5.32265631201090 | 3.78828644668606 | 3.70351797397218 |
| H | 6.47633665012927 | 2.44763205675708 | 3.59501924770392 |



|    |                   |                  |                   |
|----|-------------------|------------------|-------------------|
| H  | 5.49282505008329  | 1.69548687626446 | 5.70349927039932  |
| H  | 8.28968473558535  | 1.69502215036842 | 5.93128834372845  |
| H  | 4.18917926012042  | 4.09751602013945 | 5.93865507779253  |
| H  | 8.38644451885332  | 6.49773746442475 | 6.02180337290079  |
| H  | 11.10630107868759 | 6.54701109446437 | 5.93328181933688  |
| H  | 1.54198385355807  | 0.32980271872101 | 3.75006630718429  |
| H  | 4.73056390498650  | 6.12691185089979 | 3.67190561774756  |
| H  | 6.51176393880022  | 5.98861239261609 | 3.69843723161025  |
| H  | 8.68712843697398  | 3.65871680250202 | 3.72217671221855  |
| H  | 10.46594761425610 | 3.60696251885894 | 3.61354143373447  |
| H  | 9.63129548287434  | 5.17360858457169 | 3.74166599028404  |
| Pd | 8.38831140743793  | 0.03242445756464 | 6.72170439030700  |
| Pd | 2.76263959578688  | 0.03747995063651 | 6.80653314374967  |
| Pd | 5.57964970471508  | 0.04334205965406 | 6.83650641900627  |
| Pd | 9.75563680945514  | 2.46778485374984 | 6.73410171360132  |
| Pd | 11.12906288528198 | 4.86082938977612 | 6.71587714271528  |
| Pd | 4.18167562205903  | 2.41620767049515 | 6.55783461364780  |
| Pd | 5.58341974391657  | 4.89490327409294 | 6.75876217934063  |
| Pd | 6.94969339420432  | 2.45648939739187 | 6.82041770050073  |
| Pd | 8.35742793071493  | 4.85588049085985 | 6.79905648918552  |
| Pd | 1.38335768808011  | 0.83977085452185 | 9.11337882838843  |
| Pd | 4.17997315574821  | 0.83701942629429 | 9.09877213728669  |
| Pd | 6.98661453465718  | 0.82577561598820 | 9.12842060039378  |
| Pd | 2.81147230850489  | 3.23182586311244 | 9.04311410047034  |
| Pd | 4.17126109724650  | 5.67064401234763 | 9.11400877325513  |
| Pd | 5.56774790185508  | 3.25161946019131 | 9.07824139065769  |
| Pd | 6.97712337298341  | 5.66408887424028 | 9.14031564561380  |
| Pd | 8.37481039298543  | 3.24616458723983 | 9.13708120831285  |
| Pd | 9.78019774951012  | 5.66768508080538 | 9.14824146029571  |
| Pd | 2.79284680850055  | 1.62606674949955 | 11.39655052661421 |
| Pd | 5.58284787816358  | 1.62845587961293 | 11.42569020225544 |
| Pd | 8.38420033214761  | 1.62070831527916 | 11.42067135403886 |
| Pd | 4.18480571907890  | 4.03993642031241 | 11.39230288307821 |
| Pd | 5.58314113550803  | 6.46777839099639 | 11.43517321609394 |
| Pd | 6.97962359038008  | 4.04179970994119 | 11.41523532529800 |
| Pd | 8.38023578261445  | 6.46980552533432 | 11.42225974692811 |
| Pd | 9.78726774286619  | 4.03873251711649 | 11.40613820082001 |
| Pd | 11.18215342842784 | 6.46860965807503 | 11.42013768115213 |
| Pd | 0.00000000000000  | 0.00000000000000 | 13.69774263914397 |
| Pd | 2.79562062279034  | 0.00000000000000 | 13.69774263914397 |
| Pd | 5.59208001564448  | 0.00000000000000 | 13.69774263914397 |
| Pd | 1.39781031139517  | 2.42107847868010 | 13.69774263914397 |
| Pd | 2.79604000782224  | 4.84288335354340 | 13.69774263914397 |
| Pd | 4.19343093418550  | 2.42107847868010 | 13.69774263914397 |
| Pd | 5.59166063061258  | 4.84288335354340 | 13.69774263914397 |
| Pd | 6.98989032703965  | 2.42107847868010 | 13.69774263914397 |
| Pd | 8.38812002346672  | 4.84288335354340 | 13.69774263914397 |
| Pd | 1.39781031139517  | 0.80702615956003 | 15.98035731922317 |
| Pd | 4.19426970424931  | 0.80702615956003 | 15.98035731922317 |
| Pd | 6.98989032703965  | 0.80702615956003 | 15.98035731922317 |
| Pd | 2.79562062279033  | 3.22810463824014 | 15.98035731922317 |
| Pd | 4.19385031921738  | 5.64990951310338 | 15.98035731922317 |
| Pd | 5.59124124558067  | 3.22810463824014 | 15.98035731922317 |
| Pd | 6.99030971207153  | 5.64990951310338 | 15.98035731922317 |
| Pd | 8.38770063843482  | 3.22810463824014 | 15.98035731922317 |
| Pd | 9.78593033486186  | 5.64990951310338 | 15.98035731922317 |

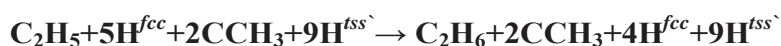

|    |                   |                  |                   |
|----|-------------------|------------------|-------------------|
| C  | 4.42175444228375  | 1.88198635336307 | 3.90275472147116  |
| C  | 5.26494290454141  | 2.74223224040844 | 2.99042477447232  |
| C  | 5.61006502706014  | 6.52682424455213 | 5.13618859512570  |
| C  | 9.65130126509032  | 4.08946903592811 | 5.12992423326296  |
| C  | 5.64146228022533  | 6.56329638641482 | 3.65071124279855  |
| C  | 9.57165355642907  | 4.14530508057130 | 3.64664610564381  |
| H  | 4.57451730328569  | 0.81247188268392 | 3.73811164723971  |
| H  | 3.34668273177747  | 2.09365054327436 | 3.83439373905581  |
| H  | 4.99390682336078  | 2.53784714059542 | 1.93982494179931  |
| H  | 5.11349017630362  | 3.81180586757569 | 3.17380270962275  |
| H  | 6.33701103553487  | 2.53162397945365 | 3.10281767343051  |
| H  | 5.47331520191632  | 1.71789115252087 | 5.25414943070950  |
| H  | 8.29481109664474  | 1.71431667561148 | 5.49535134343090  |
| H  | 4.15514068322109  | 4.15377835745098 | 5.50445999216166  |
| H  | 8.34370504255979  | 6.50474254557223 | 5.60526948912610  |
| H  | 11.08851690366528 | 6.56104437112195 | 5.49749616284607  |
| H  | 9.73024114417499  | 2.43294450147524 | 8.26828461790667  |
| H  | 4.15292379972079  | 2.45226356203625 | 8.04100864685456  |
| H  | 6.99475915426308  | 2.42722375655715 | 8.16032567052866  |
| H  | 11.15485452615612 | 4.90418552010230 | 8.27552029619270  |
| H  | 8.34545410337484  | 0.01706817644311 | 8.26393638685484  |
| H  | 5.56876762722422  | 4.87622074847091 | 8.26454335652218  |
| H  | 2.78024179134864  | 0.00260413888721 | 8.29875848661732  |
| H  | 8.37586709939280  | 4.86514847951227 | 8.33101096679889  |
| H  | 9.77245677359461  | 7.24746346090285 | 8.21992317997980  |
| H  | 1.58604253687152  | 0.33102752015982 | 3.29124553368045  |
| H  | 4.69817076374273  | 6.18239749869460 | 3.22988851875276  |
| H  | 6.46877362848073  | 5.94969866646913 | 3.26192650369290  |
| H  | 8.64899715634104  | 3.66156473395325 | 3.29067388476913  |
| H  | 10.42777822023289 | 3.63087642808880 | 3.18004084890566  |
| H  | 9.57395772519329  | 5.18861988486485 | 3.29615493260006  |
| Pd | 8.36372799652212  | 0.06271223870536 | 6.26877909926343  |
| Pd | 2.73809775832716  | 0.07297398210955 | 6.37711962492873  |
| Pd | 5.55260118653352  | 0.09214866452014 | 6.37642719280133  |
| Pd | 9.73189408273638  | 2.49366344141021 | 6.31187137776620  |
| Pd | 11.09215207438936 | 4.89168958652125 | 6.27535004127335  |
| Pd | 4.15056231559656  | 2.44122479752119 | 6.09375690729070  |
| Pd | 5.56175429413648  | 4.91701944224455 | 6.31800129895437  |
| Pd | 6.91577336581094  | 2.49592013182962 | 6.34734548197163  |
| Pd | 8.32690112400964  | 4.88250847164395 | 6.38508040222468  |
| Pd | 1.37112002366912  | 0.82828811130877 | 9.05776815289283  |
| Pd | 4.17537205080409  | 0.84531200570788 | 9.00274513041845  |
| Pd | 6.96339227408769  | 0.82810166073022 | 9.06218055925241  |
| Pd | 2.78579952880409  | 3.24160860980066 | 8.97348894650098  |
| Pd | 4.16784437270596  | 5.67127069141422 | 9.08417597212812  |
| Pd | 5.56054060099033  | 3.23907969896817 | 8.96982217923414  |
| Pd | 6.96715429221531  | 5.65989993273575 | 9.09804601871875  |
| Pd | 8.35189096169289  | 3.24016370552706 | 9.10060927526824  |
| Pd | 9.76812130641331  | 5.67545558839236 | 9.12996561896775  |
| Pd | 2.78856594258615  | 1.62713095223352 | 11.38227782912703 |
| Pd | 5.57415272372686  | 1.62841370806321 | 11.37892032529800 |
| Pd | 8.37488814156854  | 1.61976486283338 | 11.40788291854524 |
| Pd | 4.18225463773668  | 4.03339683873538 | 11.37678556343424 |
| Pd | 5.57861360983668  | 6.46907035937008 | 11.40812734090500 |

|    |                   |                  |                   |
|----|-------------------|------------------|-------------------|
| Pd | 6.96514941498576  | 4.03644323154795 | 11.40412365662135 |
| Pd | 8.37360336435368  | 6.47756556640705 | 11.40691801845269 |
| Pd | 9.78521923326836  | 4.03283841239894 | 11.40261801633774 |
| Pd | 11.17596827399032 | 6.46996303760028 | 11.42223729453777 |
| Pd | 0.00000000000000  | 0.00000000000000 | 13.69774263914397 |
| Pd | 2.79562062279034  | 0.00000000000000 | 13.69774263914397 |
| Pd | 5.59208001564448  | 0.00000000000000 | 13.69774263914397 |
| Pd | 1.39781031139517  | 2.42107847868010 | 13.69774263914397 |
| Pd | 2.79604000782224  | 4.84288335354340 | 13.69774263914397 |
| Pd | 4.19343093418550  | 2.42107847868010 | 13.69774263914397 |
| Pd | 5.59166063061258  | 4.84288335354340 | 13.69774263914397 |
| Pd | 6.98989032703965  | 2.42107847868010 | 13.69774263914397 |
| Pd | 8.38812002346672  | 4.84288335354340 | 13.69774263914397 |
| Pd | 1.39781031139517  | 0.80702615956003 | 15.98035731922317 |
| Pd | 4.19426970424931  | 0.80702615956003 | 15.98035731922317 |
| Pd | 6.98989032703965  | 0.80702615956003 | 15.98035731922317 |
| Pd | 2.79562062279031  | 3.22810463824008 | 15.98035731922317 |
| Pd | 4.19385031921741  | 5.64990951310333 | 15.98035731922317 |
| Pd | 5.59124124558064  | 3.22810463824008 | 15.98035731922317 |
| Pd | 6.99030971207156  | 5.64990951310333 | 15.98035731922317 |
| Pd | 8.38770063843479  | 3.22810463824008 | 15.98035731922317 |
| Pd | 9.78593033486189  | 5.64990951310333 | 15.98035731922317 |

## Transition states on terraces of Pd<sub>79</sub> nanoparticles

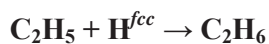

|    |                   |                   |                   |
|----|-------------------|-------------------|-------------------|
| C  | 13.13434499173146 | 5.97330013120876  | 14.31064592491960 |
| C  | 12.46031141509199 | 4.61325192048391  | 14.32159748218890 |
| H  | 14.18202825975301 | 5.94156598176562  | 13.99617659209533 |
| H  | 13.06002897487531 | 6.47814579888917  | 15.28588106527070 |
| H  | 12.55767240040131 | 4.09289853862853  | 13.36019159569754 |
| H  | 11.39059158856920 | 4.69049437692430  | 14.55786553566138 |
| H  | 12.93123998344354 | 3.98768524127219  | 15.09818275827443 |
| H  | 12.62697324907595 | 6.37183779589199  | 12.88214875992997 |
| Pd | 13.66414133067191 | 13.81906374454024 | 7.12800757386401  |
| Pd | 13.70130432273533 | 15.13505879925074 | 9.50604715254434  |
| Pd | 13.93375743942453 | 13.80538671812260 | 11.83113609430067 |
| Pd | 13.87424899055154 | 11.14004862366694 | 7.01430584170762  |
| Pd | 14.05379318197364 | 12.45221035931197 | 9.43507175725345  |
| Pd | 14.23517464656679 | 11.06777469396075 | 11.74663601716844 |
| Pd | 13.94674528378076 | 8.44526465071718  | 7.04537783668812  |
| Pd | 14.02749721543281 | 12.36976074830294 | 14.10055278417549 |
| Pd | 14.18289317051514 | 9.76456603261978  | 9.38983651439553  |
| Pd | 14.25551653712128 | 8.33206228950798  | 11.73147061719534 |
| Pd | 14.20237392125159 | 9.67503673686697  | 14.07924437496779 |
| Pd | 14.13437633406275 | 7.05101434688935  | 9.362605443363028 |
| Pd | 11.36809211560364 | 16.36198658008649 | 8.85080644368013  |
| Pd | 11.33801922711393 | 15.05436795763054 | 6.46704519450215  |
| Pd | 11.53883815225654 | 13.65186401400045 | 8.79967382644715  |
| Pd | 11.61778708271301 | 15.13561722411812 | 11.24660765465163 |
| Pd | 11.55254713669730 | 12.37154010499863 | 6.22771413745152  |
| Pd | 11.77674901645316 | 13.73534631209062 | 13.53939686558082 |

|    |                   |                   |                   |
|----|-------------------|-------------------|-------------------|
| Pd | 11.75183522295010 | 10.96589054648570 | 8.69056684981623  |
| Pd | 11.79166086558079 | 12.28373361842097 | 11.13925816054908 |
| Pd | 11.69552080308309 | 9.67283874910488  | 6.19696845425687  |
| Pd | 11.81322356030941 | 8.26472804736256  | 8.71693992796830  |
| Pd | 11.88150048108199 | 10.81738904982744 | 13.42055304312200 |
| Pd | 11.88445870599928 | 12.20617756805266 | 15.75875651299370 |
| Pd | 11.93903712342875 | 9.48065264451452  | 11.10421256900657 |
| Pd | 11.78546545755298 | 6.96931463692750  | 6.32500814360615  |
| Pd | 11.95693407367777 | 5.56666289253999  | 8.64160279698654  |
| Pd | 12.03115889368759 | 9.50125256504392  | 15.76396379013471 |
| Pd | 12.11333600264028 | 6.63573813841558  | 11.11991241730156 |
| Pd | 12.20049296144591 | 7.85346957167069  | 13.59281793713707 |
| Pd | 9.24135655730108  | 16.29304868096898 | 10.49383328592862 |
| Pd | 9.18171695231017  | 13.64680269357298 | 5.68025632601508  |
| Pd | 9.14767669841691  | 15.04188882429799 | 8.05035344664297  |
| Pd | 9.41226199175992  | 13.57394989288299 | 10.46464994080650 |
| Pd | 9.39356665100972  | 10.90922481011750 | 5.52674205681865  |
| Pd | 9.48359930946323  | 14.98249671522554 | 12.89941902416929 |
| Pd | 9.37542070179117  | 12.23313885631067 | 8.01076873008733  |
| Pd | 9.59332878498247  | 13.49217904641368 | 15.19478878722229 |
| Pd | 9.56015204377824  | 10.76739153825379 | 10.41299845893991 |
| Pd | 9.48084202847686  | 8.15917369552784  | 5.56899083696595  |
| Pd | 9.57657511385579  | 12.12112091772647 | 12.85030787361714 |
| Pd | 9.50775599478717  | 9.44462931471418  | 7.95570471009902  |
| Pd | 9.66553216535816  | 10.74523510212168 | 15.28711439215716 |
| Pd | 9.69149492160409  | 7.99855082949969  | 10.33750988083604 |
| Pd | 9.74851658378332  | 9.32690498234390  | 12.81109606533990 |
| Pd | 9.58539821749534  | 6.64208162295219  | 7.86272589646768  |
| Pd | 9.87401077532787  | 8.00424065514243  | 15.13491328945341 |
| Pd | 9.82721609562359  | 5.31762699796385  | 10.27721397965046 |
| Pd | 9.91927170215614  | 6.56234849476874  | 12.74541885443333 |
| Pd | 7.51973788603226  | 9.29810176943760  | 14.53402761453224 |
| Pd | 7.45074706560478  | 6.50937488535921  | 9.52230996071396  |
| Pd | 7.68937926008491  | 5.27339645163635  | 11.93073058967345 |
| Pd | 7.72106499478052  | 6.60076021653543  | 14.31455370876458 |
| Pd | 7.56390161993370  | 7.98465807154921  | 11.98254223105066 |
| Pd | 7.30156249448773  | 9.30862772670252  | 9.64575046786888  |
| Pd | 7.36176832197898  | 11.98863384671747 | 14.61671916932676 |
| Pd | 7.33798369520128  | 10.67177379686521 | 12.09941887048116 |
| Pd | 7.27257207057397  | 7.87903352370546  | 7.20084813310753  |
| Pd | 7.17020719294971  | 12.08650972350707 | 9.71493955426307  |
| Pd | 7.18083513464055  | 9.43497224360593  | 4.99015185101281  |
| Pd | 7.29594496684829  | 14.68792426220473 | 14.47282977329526 |
| Pd | 7.20732894054083  | 10.74358194881505 | 7.36331631593010  |
| Pd | 7.27047259880470  | 13.36186076536529 | 12.10238127006449 |
| Pd | 7.01956718596839  | 14.89557227114616 | 9.70051549712503  |
| Pd | 7.03402396784234  | 12.14763173318714 | 5.03824665041183  |
| Pd | 6.99043435294270  | 13.58742008677778 | 7.33537544489002  |
| Pd | 7.12653682298671  | 16.06965793082481 | 12.14114110794201 |
| Pd | 5.38052234757884  | 6.53228893792290  | 11.26835732832839 |
| Pd | 5.41586980844088  | 7.85740164324197  | 13.63606657095211 |
| Pd | 5.05567897438951  | 9.22086646842665  | 11.33300562015132 |
| Pd | 5.19039550791867  | 10.54742250810880 | 13.74349978116640 |
| Pd | 5.12548596183857  | 7.86555084945961  | 8.93031215071233  |
| Pd | 4.89553570935177  | 11.92152391579380 | 11.37820893015710 |
| Pd | 5.03154663807430  | 9.29694300264361  | 6.65171157679076  |
| Pd | 4.86886066819898  | 10.60713094778777 | 9.01970509435317  |

|    |                  |                   |                   |
|----|------------------|-------------------|-------------------|
| Pd | 5.12055881824062 | 13.23588063466720 | 13.73672064752458 |
| Pd | 4.94226288421629 | 14.62721940798108 | 11.41094847607516 |
| Pd | 4.88233651362529 | 12.00826967198474 | 6.69933494789716  |
| Pd | 4.84291607004042 | 13.35198509783606 | 9.03862506762470  |

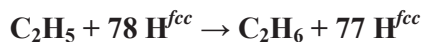

|   |                   |                   |                   |
|---|-------------------|-------------------|-------------------|
| C | 13.25060576668444 | 5.87510939031253  | 14.14647334901666 |
| C | 12.40942280993947 | 4.86332590997177  | 14.88933256343284 |
| H | 13.88381097427039 | 6.49056700998841  | 14.79656871853008 |
| H | 13.87211123257132 | 5.43228306858756  | 13.36369276670758 |
| H | 11.79766712382041 | 5.32332949429596  | 15.67439557790194 |
| H | 13.08740701593373 | 4.13739524709595  | 15.37114122605616 |
| H | 11.74170103282396 | 4.30155335412201  | 14.22337419470082 |
| H | 9.50588021311932  | 4.93048428264013  | 12.12194788134646 |
| H | 8.74415214798747  | 12.28734929019219 | 4.48414509309706  |
| H | 8.88178675406431  | 9.47885271876909  | 4.43176097949520  |
| H | 4.10344714659592  | 10.49778062465317 | 10.66832817694865 |
| H | 4.24324693431749  | 7.71346628924605  | 10.58969078694073 |
| H | 4.04925724775983  | 9.15809552344355  | 8.20524723286561  |
| H | 3.90891382304680  | 11.97147288698451 | 8.27038291006945  |
| H | 3.96518947604478  | 13.29903172898760 | 10.72009216412750 |
| H | 4.15456875110441  | 11.85732517779996 | 13.12372666522171 |
| H | 4.28847686690070  | 9.07937251573506  | 13.05887347573855 |
| H | 7.35874129637876  | 13.86977515787875 | 5.55431988066013  |
| H | 7.44900172894040  | 16.56210189090035 | 10.47115192072632 |
| H | 7.38914436035910  | 15.20546901098645 | 8.01749362780371  |
| H | 5.18357903774881  | 15.05906744352713 | 9.74150517053890  |
| H | 5.14050821462777  | 13.72776929438758 | 7.29605287797393  |
| H | 7.84882993456671  | 13.40697417892517 | 15.71899096459439 |
| H | 7.98771634549150  | 10.60104204031718 | 15.65086756040727 |
| H | 8.15426458802049  | 7.78473252587869  | 15.57275273246493 |
| H | 5.60736142691710  | 11.86654015182182 | 14.97871215238741 |
| H | 5.73774387282415  | 9.09764956860429  | 14.91204258947493 |
| H | 8.02973862459850  | 4.85241821924330  | 10.22231263024477 |
| H | 7.65831233880888  | 7.73265376993518  | 5.41331661076349  |
| H | 7.83253001962704  | 6.29079646542657  | 7.82375314532056  |
| H | 5.43009662455619  | 7.58991731477758  | 7.13930633087867  |
| H | 5.62163154003499  | 6.14288046449288  | 9.53451228037561  |
| H | 8.88187988195779  | 16.59727839126049 | 12.33476847117976 |
| H | 9.08684595874664  | 15.14332584006421 | 14.74338357661999 |
| H | 15.02486301798271 | 11.07775714248698 | 10.14525476296378 |
| H | 15.15286969509709 | 8.27956715826337  | 10.08078192544016 |
| H | 14.98409349939641 | 9.70809597059737  | 7.67626285493085  |
| H | 14.84349992518435 | 12.50379926137876 | 7.75105691669013  |
| H | 14.88708608003936 | 13.86855977973355 | 10.21800309648358 |
| H | 15.07738576248443 | 12.42502590962998 | 12.60084393904650 |
| H | 15.19203954090730 | 9.58326545878757  | 12.55880319821875 |
| H | 13.93071533799780 | 6.55544461341530  | 11.02884645223331 |
| H | 12.25345541159377 | 6.27761659551434  | 12.89618004624405 |
| H | 11.71702544479429 | 7.77721023328756  | 15.33048540292402 |
| H | 11.66097499065758 | 5.01911867761784  | 10.37523326736103 |
| H | 10.03554545750522 | 6.43802400088121  | 6.09910485578331  |
| H | 10.20288387774368 | 4.99755207347459  | 8.53462346463683  |
| H | 13.40104647465390 | 12.47151393783012 | 5.89933677218265  |
| H | 13.52290981064032 | 9.70716532018197  | 5.82966121249418  |

|    |                   |                   |                   |
|----|-------------------|-------------------|-------------------|
| H  | 10.98354619564697 | 13.78080323367836 | 5.22944729946898  |
| H  | 11.26750221865438 | 8.18099315321959  | 5.10777637159191  |
| H  | 11.12814840375110 | 10.98449074054150 | 5.16972998923019  |
| H  | 9.63809572339435  | 16.70847659724499 | 8.77252703830402  |
| H  | 9.58972784858799  | 15.34046095509850 | 6.29070672118907  |
| H  | 11.44966890995678 | 13.86271005944497 | 15.39104422633486 |
| H  | 11.27621598613636 | 15.28197278619374 | 12.97971375073127 |
| H  | 11.08862978659947 | 16.73758159353366 | 10.62491183846714 |
| H  | 13.48974354465920 | 15.43154351246113 | 11.28495030022193 |
| H  | 13.68680990324929 | 13.98379104819853 | 13.64888993128996 |
| H  | 10.25219288796492 | 12.11623290855955 | 16.40934787491265 |
| H  | 10.36185227425530 | 9.30978429593939  | 16.34175778697642 |
| H  | 5.57822755621231  | 14.58346786520131 | 14.90153330775425 |
| H  | 5.38177573593843  | 9.08478780025914  | 4.90907257433352  |
| H  | 6.02812503892186  | 6.45520385287110  | 14.74097386580746 |
| H  | 13.74189561559787 | 5.33049761997295  | 8.68449618167506  |
| H  | 15.07987545977954 | 10.94736527168878 | 14.86238282097350 |
| H  | 13.19401975711223 | 16.71390005408471 | 8.91338865402260  |
| H  | 13.74630580396468 | 12.51428893681558 | 15.90080166454445 |
| H  | 12.58550864356094 | 10.83737988079405 | 16.87071828135421 |
| H  | 13.89853062699135 | 9.29488560484797  | 15.83944781622431 |
| H  | 4.03502433547923  | 10.62661186548583 | 5.93670770149277  |
| H  | 5.22488508896704  | 12.31181991049482 | 4.98481865670945  |
| H  | 6.57221242508258  | 10.78934744994777 | 3.95117451276023  |
| H  | 12.33603914219931 | 5.29732076517514  | 6.89442723195746  |
| H  | 13.53985497328186 | 6.98752632929141  | 5.91107734286478  |
| H  | 14.96052511495193 | 7.03956401192192  | 7.69529051646033  |
| H  | 14.53294324571109 | 15.19139342098388 | 7.88999043682236  |
| H  | 13.14184372826690 | 15.16184687617831 | 6.10469092907543  |
| H  | 11.79897942859400 | 16.67534983049471 | 7.13577441309834  |
| H  | 6.76287866518293  | 16.28597978376646 | 13.94870741231749 |
| H  | 5.35099406748195  | 16.24110228013093 | 12.14523578404134 |
| H  | 4.17182869378586  | 14.54061773066509 | 13.10866231867637 |
| H  | 4.59631626452739  | 6.37224399746731  | 12.93677024464424 |
| H  | 5.94835617623337  | 4.85947134994750  | 11.88754877569691 |
| H  | 7.34637652374340  | 4.91344668258268  | 13.70289495871861 |
| Pd | 13.82876659717211 | 13.88709282499037 | 7.02567099009028  |
| Pd | 13.87275687533354 | 15.23735489256105 | 9.47528095064023  |
| Pd | 14.13431296038024 | 13.82429963428113 | 11.88850154966322 |
| Pd | 14.04025635839802 | 11.09341807491787 | 6.90784351709535  |
| Pd | 14.10498660221555 | 12.44291688087938 | 9.41209176773850  |
| Pd | 14.30880954399811 | 10.98976381715183 | 11.80539836328339 |
| Pd | 14.10335811101726 | 8.28673627381045  | 6.88169086054400  |
| Pd | 14.24920748919299 | 12.33118829432776 | 14.26284204617594 |
| Pd | 14.26041205117120 | 9.65497213502223  | 9.33207415324826  |
| Pd | 14.37758056409702 | 8.19098330694786  | 11.74265979383324 |
| Pd | 14.36766300890534 | 9.53738813062938  | 14.21549984436501 |
| Pd | 14.27198334868948 | 6.86479897317305  | 9.26088888130124  |
| Pd | 11.48980526914337 | 16.53000400354270 | 8.81644934716500  |
| Pd | 11.44325208308370 | 15.18058386093214 | 6.36875316270544  |
| Pd | 11.56936597171932 | 13.66832484623668 | 8.78762620691395  |
| Pd | 11.69947557068726 | 15.14322259078156 | 11.24123243167181 |
| Pd | 11.60794473814574 | 12.38596379625771 | 6.20079022447137  |
| Pd | 11.88746800098342 | 13.70140609767050 | 13.63671014797724 |
| Pd | 11.77741216608304 | 10.94790470312041 | 8.66974154696135  |
| Pd | 11.84052219982642 | 12.28470932978046 | 11.15821862754105 |
| Pd | 11.74245944722015 | 9.59163872046149  | 6.14200155155339  |



|    |                   |                   |                    |
|----|-------------------|-------------------|--------------------|
| Pd | 11.83373419864278 | 8.22173463263867  | 8.66726722477645   |
| Pd | 11.96920371266016 | 10.78753615636631 | 13.48588154207383  |
| Pd | 12.05902154488746 | 12.21333420516268 | 15.99416464825080  |
| Pd | 11.97469567862171 | 9.47257176589540  | 11.08927856954241  |
| Pd | 11.85480150021910 | 6.78815875871034  | 6.18421960316144   |
| Pd | 12.03133310431885 | 5.35910618100971  | 8.58121540648111   |
| Pd | 12.17935717569328 | 9.43337155328099  | 15.96145865214188  |
| Pd | 12.12294095035694 | 6.62274037590325  | 11.08688590202792  |
| Pd | 12.25962122923894 | 7.84127581916838  | 13.58191819939197  |
| Pd | 9.28014867618963  | 16.46254793844177 | 10.54472219040754  |
| Pd | 9.18215234974283  | 13.72203269757341 | 5.55303840936146   |
| Pd | 9.19650344763671  | 15.10567251999391 | 8.04307252437150   |
| Pd | 9.42634916476728  | 13.60258239043543 | 10.47813349853864  |
| Pd | 9.35267224418583  | 10.88818719751809 | 5.46868314934373   |
| Pd | 9.49881065577663  | 15.01329956902525 | 12.97754092358869  |
| Pd | 9.36998044374289  | 12.24818803660673 | 7.98674481695789   |
| Pd | 9.65562433285374  | 13.54089949818177 | 15.40328855190517  |
| Pd | 9.55766405226514  | 10.79256698203455 | 10.40651980853784  |
| Pd | 9.46166436010575  | 8.04577293363101  | 5.42457543668550   |
| Pd | 9.62659366462029  | 12.13643601381366 | 12.89891319092627  |
| Pd | 9.50393701854979  | 9.43217954463796  | 7.93060025868793   |
| Pd | 9.77131591580371  | 10.71481800319932 | 15.37531214302289  |
| Pd | 9.69259016598684  | 7.98126384698220  | 10.35142424836861  |
| Pd | 9.77089397690341  | 9.32577379620570  | 12.84382405228424  |
| Pd | 9.61514408732734  | 6.57855740815252  | 7.85714759719260   |
| Pd | 9.93370456864655  | 7.89836732212232  | 15.24859681329624  |
| Pd | 9.83785633307226  | 5.13782613022276  | 10.31096073963164  |
| Pd | 9.93116093704123  | 6.51572199482026  | 12.80569646166398  |
| Pd | 7.52423956535045  | 9.20558758313082  | 14.61044565948411  |
| Pd | 7.41004103269326  | 6.42476207016512  | 9.56811766105834   |
| Pd | 7.64223659073589  | 5.08035153776923  | 12.02055991534349  |
| Pd | 7.71237702246076  | 6.42392499925587  | 14.41607492076368  |
| Pd | 7.55339422143545  | 7.92052956038907  | 12.02931170445313  |
| Pd | 7.27722550084043  | 9.27904614350119  | 9.66500105989269   |
| Pd | 7.38753003183338  | 11.99613941398308 | 14.66964676010350  |
| Pd | 7.35062462074070  | 10.64196380449158 | 12.13961443413863  |
| Pd | 7.22284736652881  | 7.86385372213106  | 7.16805381012544   |
| Pd | 7.15026281709870  | 12.10317807531003 | 9.72952060881523   |
| Pd | 7.06986271413276  | 9.39447682216204  | 4.82496669862640   |
| Pd | 7.26106429748124  | 14.79598590810355 | 14.64451772681329  |
| Pd | 7.17444880503576  | 10.74955801967860 | 7.35474283191221   |
| Pd | 7.28408984217473  | 13.37009299038775 | 12.15288876938739  |
| Pd | 6.99591798710877  | 14.95779059619553 | 9.76489502410539   |
| Pd | 6.93468389219102  | 12.18277781647154 | 4.88642075836290   |
| Pd | 6.94847645935062  | 13.61049418620621 | 7.30413775052467   |
| Pd | 7.06844198208885  | 16.22868092862891 | 12.258792304440407 |
| Pd | 5.24364689039931  | 6.33707334834075  | 11.34551057945411  |
| Pd | 5.29957331458726  | 7.68917818446288  | 13.79241507465201  |
| Pd | 5.02185418575180  | 9.13333795261342  | 11.40127462988129  |
| Pd | 5.09792013027391  | 10.48376313516818 | 13.90059976404552  |
| Pd | 4.98569250436755  | 7.75058772348589  | 8.92043032375755   |
| Pd | 4.88036639922339  | 11.92676250246604 | 11.46429795801180  |
| Pd | 4.87314330048716  | 9.25190507121673  | 6.54419159711426   |
| Pd | 4.81686521181774  | 10.58717594926127 | 9.00911613773050   |
| Pd | 5.02438290094519  | 13.28916237360460 | 13.91747540435081  |
| Pd | 4.83335527923783  | 14.72486780881645 | 11.53454704097931  |
| Pd | 4.73479163889063  | 12.04001364516802 | 6.60715585634977   |

Pd 4.71314267924222 13.42651017415210 9.04857480448848

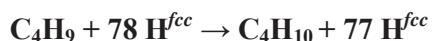

|   |                   |                   |                   |
|---|-------------------|-------------------|-------------------|
| C | 13.32220091230030 | 5.74472753279117  | 14.21741325226405 |
| C | 12.24659617208582 | 4.94317802511030  | 14.92959091027636 |
| C | 14.47620549416111 | 6.22832513962651  | 15.07180344255878 |
| C | 12.74372573692121 | 3.53631710845281  | 15.30283610146916 |
| H | 13.72931289766065 | 5.13956148618368  | 13.39241807713810 |
| H | 11.91507166261542 | 5.47747235718967  | 15.83178523230197 |
| H | 11.35807845378400 | 4.84960046351863  | 14.28130037044719 |
| H | 9.52696539305369  | 4.91918107222931  | 12.11246603496830 |
| H | 8.73997277754684  | 12.28213232278339 | 4.49394548694807  |
| H | 8.88500770085870  | 9.47504080205196  | 4.44378625138424  |
| H | 4.11446546366561  | 10.49264325117266 | 10.67803516532215 |
| H | 4.26069334126623  | 7.70085243389696  | 10.60825211583678 |
| H | 4.06200629075348  | 9.14017436010554  | 8.22225838485192  |
| H | 3.91185960174838  | 11.95105946788436 | 8.27875724722487  |
| H | 3.96213112718550  | 13.28966267457063 | 10.72625107098734 |
| H | 4.15236516449183  | 11.86451979684942 | 13.12993318109205 |
| H | 4.29408985996804  | 9.07920224812998  | 13.06858697284859 |
| H | 7.34743536291964  | 13.85819045529354 | 5.56334099252936  |
| H | 7.43588443952468  | 16.55643265561492 | 10.47110526618339 |
| H | 7.37974152671369  | 15.19274479003769 | 8.02310965355136  |
| H | 5.17809107018808  | 15.04778069667599 | 9.74158099718833  |
| H | 5.13937453891779  | 13.70691699343238 | 7.30227001230606  |
| H | 7.84643791912816  | 13.41176618980823 | 15.72186176017997 |
| H | 7.97934111900408  | 10.60635587785907 | 15.65464504987179 |
| H | 8.15234444692722  | 7.77409845642832  | 15.56570630583773 |
| H | 5.59902498172166  | 11.87980851756132 | 14.98547250148982 |
| H | 5.73220866801604  | 9.10145339108707  | 14.92206909678185 |
| H | 8.05658055606526  | 4.83651759507209  | 10.21867440759366 |
| H | 7.66940707424365  | 7.72400292644517  | 5.42567747228444  |
| H | 7.85266453352522  | 6.28083769333190  | 7.82953334343547  |
| H | 5.44603660147305  | 7.57131035754005  | 7.15988691334292  |
| H | 5.64193284390105  | 6.12928851264997  | 9.55203332695363  |
| H | 8.87349106836733  | 16.60112094729405 | 12.33197776562330 |
| H | 9.08435342856306  | 15.14744504360828 | 14.74672045139301 |
| H | 15.02084432747399 | 11.08163354450079 | 10.14373384900087 |
| H | 15.16343772326828 | 8.29113370293880  | 10.08204014787864 |
| H | 14.98667252018580 | 9.72500629038078  | 7.66697163933241  |
| H | 14.83826940517834 | 12.51643533142744 | 7.74514038775617  |
| H | 14.88060401509066 | 13.88095449139649 | 10.20593428357241 |
| H | 15.06714944960602 | 12.42999801346211 | 12.58946075920072 |
| H | 15.16953727375409 | 9.58266021535209  | 12.55514285512555 |
| H | 13.96324568135824 | 6.53542740661776  | 10.98234780569474 |
| H | 12.80167571208341 | 6.39057962198993  | 12.80855434977454 |
| H | 11.72552452732836 | 7.76224206208081  | 15.34968216573630 |
| H | 11.68678822232121 | 4.99925698245524  | 10.37219376697533 |
| H | 10.05299153722684 | 6.43636469393693  | 6.10244465016681  |
| H | 10.23067068829857 | 4.98624006295384  | 8.53021273694536  |
| H | 13.39091128978274 | 12.48636038245065 | 5.89647031200539  |
| H | 13.52171417674755 | 9.71947748214486  | 5.82171387965143  |
| H | 10.97423644949686 | 13.77949255497555 | 5.23369767295434  |
| H | 11.27436629705113 | 8.18302191904981  | 5.10984757872287  |
| H | 11.12343609458897 | 10.98474341480512 | 5.17877104053401  |



|    |                   |                   |                   |
|----|-------------------|-------------------|-------------------|
| H  | 9.62302555740684  | 16.70669458120048 | 8.77028828110762  |
| H  | 9.58286679626740  | 15.33933503120510 | 6.29391135632139  |
| H  | 11.44857902518299 | 13.86642190619803 | 15.38678039541262 |
| H  | 11.27233877265599 | 15.28687188782851 | 12.97987284756655 |
| H  | 11.07551634887739 | 16.73992725228779 | 10.62344400553669 |
| H  | 13.48101313389274 | 15.43855854060004 | 11.27886323510068 |
| H  | 13.68293234540068 | 13.98715880387205 | 13.64109132042194 |
| H  | 10.24922779436001 | 12.11707925740251 | 16.40394354428138 |
| H  | 10.33404185523436 | 9.30374358897905  | 16.33763593685148 |
| H  | 5.57259166065029  | 14.59542279815263 | 14.90416673580615 |
| H  | 5.38587242849807  | 9.06948476190254  | 4.92251959961096  |
| H  | 6.03432756416446  | 6.45786177629851  | 14.75461661610931 |
| H  | 13.77236855962336 | 5.33641400183009  | 8.65169042160314  |
| H  | 15.08406822982007 | 10.93969394918588 | 14.82878142998429 |
| H  | 13.17795337566749 | 16.72497496078750 | 8.91756605112630  |
| H  | 13.74216304475296 | 12.50444963050544 | 15.89207659736639 |
| H  | 12.55648303200691 | 10.83735217389093 | 16.87179082426288 |
| H  | 13.86919828220372 | 9.34401260426078  | 15.83568902918796 |
| H  | 4.03378415209215  | 10.60121386280729 | 5.95286143014479  |
| H  | 5.22064591024253  | 12.29363578997448 | 4.99156168681980  |
| H  | 6.57048303097582  | 10.77588464589446 | 3.96183614807864  |
| H  | 12.36032453843757 | 5.30040310554150  | 6.88812033657315  |
| H  | 13.55421212876507 | 6.99962633873113  | 5.89602610168547  |
| H  | 14.98698007986836 | 7.05619714754030  | 7.66899573601718  |
| H  | 14.52217948965486 | 15.20543470015469 | 7.88494656970224  |
| H  | 13.13125524161055 | 15.16899936111490 | 6.09855789556212  |
| H  | 11.77900502147929 | 16.68155150359049 | 7.13298364584297  |
| H  | 6.75645214649623  | 16.29055084539377 | 13.95139864823652 |
| H  | 5.34141527815623  | 16.23910781366748 | 12.14660003981708 |
| H  | 4.16087429264999  | 14.54582798514768 | 13.10916077409367 |
| H  | 4.60798822923215  | 6.36934664682520  | 12.94806168326536 |
| H  | 5.96770043677749  | 4.84284204241995  | 11.88597024303077 |
| H  | 7.35338332914166  | 4.90308028454539  | 13.69542339245142 |
| H  | 14.14039034050624 | 6.80064910758703  | 15.94389635365751 |
| H  | 15.19261352946417 | 6.83930295623669  | 14.50457600304377 |
| H  | 15.03040376433004 | 5.34426159822567  | 15.43688250264348 |
| H  | 11.93403963569697 | 2.96413567710808  | 15.77479488684493 |
| H  | 13.58186322780027 | 3.57419842077044  | 16.01148074660592 |
| H  | 13.07390138033446 | 2.98004052727673  | 14.41412801600865 |
| Pd | 13.82093907914559 | 13.89787402526188 | 7.02320306092406  |
| Pd | 13.86203384634050 | 15.24650330493114 | 9.47059883932330  |
| Pd | 14.12665893088239 | 13.83075368930208 | 11.88013874446971 |
| Pd | 14.03701815865543 | 11.10460426517264 | 6.90254195579003  |
| Pd | 14.10364958910799 | 12.44978647022297 | 9.40586169074651  |
| Pd | 14.29509567095615 | 10.99254522166971 | 11.79578723870486 |
| Pd | 14.11543814315315 | 8.29946179820636  | 6.86713211766415  |
| Pd | 14.24538475110443 | 12.33591278038561 | 14.25274798115599 |
| Pd | 14.26387530308979 | 9.65959618294651  | 9.32412021749752  |
| Pd | 14.38526761977988 | 8.18165403548446  | 11.72956460686936 |
| Pd | 14.33214744044502 | 9.54519152258451  | 14.20274080544035 |
| Pd | 14.29460911175030 | 6.87055472425459  | 9.23424778737085  |
| Pd | 11.47523323893349 | 16.53399412647617 | 8.81478670272065  |
| Pd | 11.43290254624170 | 15.18294315926689 | 6.36920630632710  |
| Pd | 11.56302451152188 | 13.66726687532055 | 8.79111874742797  |
| Pd | 11.68999815491834 | 15.14726314775953 | 11.23869364045119 |
| Pd | 11.60053500799174 | 12.38858668161780 | 6.20911243903599  |
| Pd | 11.88197822898562 | 13.70627328625327 | 13.63219653175658 |

|    |                   |                   |                   |
|----|-------------------|-------------------|-------------------|
| Pd | 11.77940769429469 | 10.94243598794139 | 8.67741037972686  |
| Pd | 11.83468733905850 | 12.28341869069601 | 11.15666609500365 |
| Pd | 11.74508870111166 | 9.59361622245106  | 6.14705382148387  |
| Pd | 11.85049497977399 | 8.21507657869912  | 8.66948367885005  |
| Pd | 11.95888393410447 | 10.79862893345544 | 13.48228464180478 |
| Pd | 12.05187065070914 | 12.21627417321883 | 15.98734381072365 |
| Pd | 11.97999942682697 | 9.45647029617889  | 11.09892965137176 |
| Pd | 11.87118664638224 | 6.79130544481309  | 6.18248513378255  |
| Pd | 12.05912857029755 | 5.35327110984465  | 8.57555852400944  |
| Pd | 12.15600012525229 | 9.43630769753142  | 15.95938818919092 |
| Pd | 12.16202258961838 | 6.59649153456671  | 11.09540586296528 |
| Pd | 12.27923139189539 | 7.77319768535467  | 13.61340643684656 |
| Pd | 9.26746804600393  | 16.46239231642099 | 10.54362800965000 |
| Pd | 9.17342378756332  | 13.71775981908328 | 5.55853057341524  |
| Pd | 9.18817456663305  | 15.09992612782992 | 8.04579862090216  |
| Pd | 9.42277361216279  | 13.60073608237703 | 10.48354761158103 |
| Pd | 9.34983716055157  | 10.88435942173310 | 5.48316872324617  |
| Pd | 9.49287464916619  | 15.02114762763969 | 12.97990942239803 |
| Pd | 9.36844268835634  | 12.24031587583463 | 7.99879981403415  |
| Pd | 9.65117110149347  | 13.54509981905914 | 15.40113799258882 |
| Pd | 9.56117875392603  | 10.77976978667741 | 10.41802164679875 |
| Pd | 9.47095501181474  | 8.04257397103294  | 5.43355575228022  |
| Pd | 9.62176435825474  | 12.13671975653681 | 12.90183639258381 |
| Pd | 9.51412074563576  | 9.42165299935205  | 7.94183621677012  |
| Pd | 9.75976656112977  | 10.71638515146278 | 15.37193310807394 |
| Pd | 9.71254233972660  | 7.96661960514842  | 10.35734714330469 |
| Pd | 9.78283017766182  | 9.31341076802320  | 12.85053663043550 |
| Pd | 9.63538852654773  | 6.56994810264400  | 7.861411103469532 |
| Pd | 9.93170031103169  | 7.89241857821398  | 15.24436508116135 |
| Pd | 9.86673121086658  | 5.12215978241617  | 10.30664120814727 |
| Pd | 9.94104688904822  | 6.50804137274407  | 12.79911452581685 |
| Pd | 7.52019887323133  | 9.20419137404113  | 14.61834680292333 |
| Pd | 7.43132164459985  | 6.41255336933917  | 9.57538510031576  |
| Pd | 7.66103895789883  | 5.06317935990233  | 12.01551899697344 |
| Pd | 7.71538135317916  | 6.41788379551747  | 14.40516795977964 |
| Pd | 7.56396405980788  | 7.91352773769910  | 12.03146570277486 |
| Pd | 7.28955696514732  | 9.26945751712056  | 9.67708117825088  |
| Pd | 7.37946729370697  | 12.00143251699795 | 14.67508641305648 |
| Pd | 7.35592536066764  | 10.63712430008666 | 12.15320677346577 |
| Pd | 7.23672529437589  | 7.85291339990342  | 7.18034974848224  |
| Pd | 7.15337846686069  | 12.09383714023551 | 9.74051886647638  |
| Pd | 7.07359508246324  | 9.38375001402107  | 4.83696954941828  |
| Pd | 7.25612088872384  | 14.80286797001162 | 14.64878767776631 |
| Pd | 7.17952087373301  | 10.73614477396510 | 7.36523760532374  |
| Pd | 7.28257188318434  | 13.37257902425243 | 12.15976857729427 |
| Pd | 6.98991940255440  | 14.94773276010827 | 9.77003784077695  |
| Pd | 6.93076294744136  | 12.17152233284926 | 4.89450005316145  |
| Pd | 6.94611980839544  | 13.59292758401010 | 7.31420635291846  |
| Pd | 7.05906944272055  | 16.22796321365492 | 12.26039846548333 |
| Pd | 5.26262439050489  | 6.32840423691615  | 11.35933316100400 |
| Pd | 5.30241992513528  | 7.68998142479771  | 13.80382681674856 |
| Pd | 5.03257645068530  | 9.12855435462467  | 11.41336382041460 |
| Pd | 5.09357764741189  | 10.48892678984478 | 13.91179138687969 |
| Pd | 5.00162162365966  | 7.73615844595770  | 8.93610815677658  |
| Pd | 4.88601813460839  | 11.92394781774815 | 11.47400304701597 |
| Pd | 4.88052851375333  | 9.23139396020292  | 6.55885601663871  |
| Pd | 4.82879003866420  | 10.57471229676903 | 9.02011412254749  |

|    |                  |                   |                   |
|----|------------------|-------------------|-------------------|
| Pd | 5.01836262281718 | 13.29774751561962 | 13.92206876625935 |
| Pd | 4.82486694346936 | 14.72249890300829 | 11.53574752532846 |
| Pd | 4.73519351002729 | 12.01883027956460 | 6.61586441875390  |
| Pd | 4.71010108957963 | 13.41273334550830 | 9.05497526848873  |

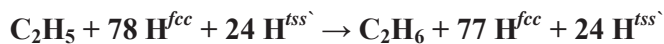

|   |                   |                   |                   |
|---|-------------------|-------------------|-------------------|
| C | 13.23618135709678 | 5.63303603111337  | 14.38199159825265 |
| C | 12.39672028606780 | 4.84454282273151  | 15.36124185620618 |
| H | 14.02658030323151 | 6.23460513825159  | 14.85064271377669 |
| H | 13.67817314628246 | 5.01408306139553  | 13.59688420328759 |
| H | 11.95973348028511 | 5.47798165411329  | 16.14361198410665 |
| H | 13.03254307338774 | 4.09208318449312  | 15.85995608000450 |
| H | 11.57677650612114 | 4.30399332354058  | 14.86927707027317 |
| H | 9.45119575630711  | 4.73038539884488  | 12.08998025715939 |
| H | 8.66505811810570  | 12.40398529868284 | 4.38401643026434  |
| H | 8.81381555237508  | 9.37849719462553  | 4.31201326591151  |
| H | 3.88537462906136  | 10.47887113660944 | 10.69531621408419 |
| H | 4.15285460491246  | 7.57875084387596  | 10.59223335396169 |
| H | 3.94786867912673  | 9.05264544098042  | 8.14536817137436  |
| H | 3.80466037159099  | 12.08603935520517 | 8.21838552266676  |
| H | 3.84916788520188  | 13.42290184796805 | 10.68924251733572 |
| H | 4.06432443346694  | 11.86426118156934 | 13.28001856269579 |
| H | 4.21266177732467  | 9.05702274855691  | 13.21451045731482 |
| H | 7.36476222244011  | 13.91418439190406 | 5.40379405857661  |
| H | 7.47935777854087  | 16.73141707221479 | 10.54707282552149 |
| H | 7.31439247481071  | 15.36545216328761 | 7.95201285137655  |
| H | 5.02193183660943  | 15.10894930020944 | 9.76558212749427  |
| H | 4.98602663036050  | 13.73159072804703 | 7.25471355038144  |
| H | 7.92753022795098  | 13.51883571389966 | 15.82688433961939 |
| H | 7.96905253307785  | 10.57397453267801 | 15.82111749313164 |
| H | 8.23320302990876  | 7.62471847294748  | 15.64656420011368 |
| H | 5.45598157416512  | 11.93725934590588 | 15.05455456971573 |
| H | 5.62266159152013  | 9.05724752204387  | 14.97525998926525 |
| H | 8.04974487128006  | 4.66221298583592  | 10.27203853267811 |
| H | 7.63944346686961  | 7.71309032716120  | 5.25669903881551  |
| H | 7.77711294036212  | 6.09996242206641  | 7.71216360672878  |
| H | 5.26840037060971  | 7.53854241049694  | 7.13669286236400  |
| H | 5.46801864668245  | 6.09795368750790  | 9.51545027268888  |
| H | 8.83042050461568  | 16.75117613405082 | 12.33635243201055 |
| H | 9.05626802730907  | 15.19733337672995 | 14.87523780956019 |
| H | 15.25737719601008 | 11.10104567452752 | 10.11147351535298 |
| H | 15.28604626310182 | 8.15802602828440  | 10.08249663461550 |
| H | 15.09840082708346 | 9.72858750639752  | 7.54017539984483  |
| H | 14.93558429318913 | 12.56425161643054 | 7.57660789149331  |
| H | 15.00716528348542 | 14.03474497570634 | 10.20887132737869 |
| H | 15.20316279811993 | 12.55215338147858 | 12.65080487345590 |
| H | 15.31383326484021 | 9.46089484457647  | 12.57227917537981 |
| H | 14.11030681126565 | 6.49108504882179  | 10.99536106493515 |
| H | 11.82401638710069 | 7.77714318454965  | 15.43194426945746 |
| H | 11.65175962156855 | 4.85084008957249  | 10.27544558080286 |
| H | 10.12064009212262 | 6.38222567060824  | 5.94475702386654  |
| H | 10.27375710782687 | 4.84140600965343  | 8.51892662048114  |
| H | 13.53422289157307 | 12.54041002202027 | 5.84116517532539  |
| H | 13.68389764773166 | 9.68289275299548  | 5.74978117327145  |

|   |                   |                   |                   |
|---|-------------------|-------------------|-------------------|
| H | 10.99265290924231 | 13.95435798551262 | 5.12023962528478  |
| H | 11.24613941957821 | 8.06873024876729  | 4.97806150218449  |
| H | 11.18611102040347 | 11.01732242352619 | 4.97324561559572  |
| H | 9.68990965645781  | 16.88764752442858 | 8.79552596254501  |
| H | 9.63591778157225  | 15.43992322268012 | 6.14709134099739  |
| H | 11.51460775209209 | 13.92721409721850 | 15.53058980619950 |
| H | 11.40500039339669 | 15.50776532673667 | 13.13669587669854 |
| H | 11.07583806322165 | 16.93210594094675 | 10.55789840593173 |
| H | 13.68774011418047 | 15.51555147942940 | 11.27316282979711 |
| H | 13.86683886123992 | 14.08832142619407 | 13.65141305604503 |
| H | 10.35929836935687 | 12.21743332535395 | 16.52155923111597 |
| H | 10.51636261770425 | 9.23206461507081  | 16.45504706220160 |
| H | 12.06794873714544 | 6.02424702529830  | 13.04193483235211 |
| H | 11.69909515596940 | 9.14690055636440  | 12.91862257591244 |
| H | 9.36180912486685  | 7.62395527781113  | 12.14856400861461 |
| H | 7.90625875478770  | 7.61733220312627  | 10.31796007351053 |
| H | 7.70069425213592  | 9.11731391784179  | 7.87016758436923  |
| H | 10.15827031462498 | 7.81885149471805  | 8.55752451734666  |
| H | 6.32303364160897  | 10.64945091690604 | 8.92660391159536  |
| H | 6.56389716838189  | 9.14894708987310  | 11.37106247103425 |
| H | 6.38786723653920  | 12.03541443023345 | 11.43425485780323 |
| H | 10.29527858385175 | 10.74099297510643 | 13.92092292803089 |
| H | 7.82120709461943  | 12.06776074385809 | 13.23508660369187 |
| H | 8.02480621062325  | 9.22523641972711  | 13.15022563939921 |
| H | 12.61903368771440 | 12.41695981991328 | 9.46300793017662  |
| H | 12.83269046509374 | 10.92964402790828 | 11.89291607358904 |
| H | 12.74823489121699 | 9.54336257128923  | 9.43031668835421  |
| H | 8.87551316186649  | 10.83898920293974 | 6.89799789320600  |
| H | 11.20180777493322 | 12.39027505995528 | 7.66905880436164  |
| H | 11.36075418139978 | 9.50352773152677  | 7.58627602325051  |
| H | 7.58866397002637  | 13.75030171824918 | 10.45743756210038 |
| H | 9.83654146264453  | 13.90516731407365 | 8.69930209327079  |
| H | 7.52568000864841  | 12.35627592878199 | 7.95183595120536  |
| H | 11.26503047058993 | 13.97224964652395 | 10.53093428304322 |
| H | 9.00968038063585  | 13.78467129898191 | 12.27978918904096 |
| H | 11.47885946526667 | 12.41908881164490 | 12.95684199439630 |
| H | 5.57336872668162  | 14.58659815146087 | 14.97348286794399 |
| H | 5.33932290036110  | 9.06939865753687  | 4.88966788091981  |
| H | 6.07079215944339  | 6.48373625775148  | 14.81035721431893 |
| H | 13.78702105430467 | 5.28598385832834  | 8.64044266326808  |
| H | 15.14817293907393 | 10.94680303624885 | 14.77724293284107 |
| H | 13.22639950525064 | 16.79742859526766 | 8.91214027012328  |
| H | 13.82459132536215 | 12.47779904095286 | 15.91122665136319 |
| H | 12.62144385789209 | 10.85100355882428 | 16.90278249434971 |
| H | 13.98067728870392 | 9.22995961307982  | 15.82761997362377 |
| H | 3.98323489998003  | 10.61001909400943 | 5.93370511923067  |
| H | 5.17926552326517  | 12.33002565076165 | 4.96238164978857  |
| H | 6.55136007413710  | 10.79781445356645 | 3.92138537001551  |
| H | 12.38011630528947 | 5.26297043905752  | 6.83401725454489  |
| H | 13.59009671727005 | 7.01470744053221  | 5.83820003312207  |
| H | 15.03457774970057 | 7.01820702830145  | 7.62680515256346  |
| H | 14.60275377651301 | 15.24514852258551 | 7.86096471984447  |
| H | 13.16108009636885 | 15.22380926554571 | 6.06076142886424  |
| H | 11.79737867027420 | 16.76176302598400 | 7.10336915564886  |
| H | 6.73337634819286  | 16.30481962345020 | 13.98816000687996 |
| H | 5.32918102061144  | 16.29395651965771 | 12.14916489949903 |
| H | 4.13689699124617  | 14.59418292599636 | 13.14741722086724 |

|    |                    |                   |                   |
|----|--------------------|-------------------|-------------------|
| H  | 4.61360940103303   | 6.32353464466075  | 12.96198055877070 |
| H  | 5.93128976223781   | 4.79520704782406  | 11.86681122964179 |
| H  | 7.34358513195860   | 4.83307370712043  | 13.72558698332775 |
| H  | 11.58863619191817  | 7.79535070713333  | 10.38404968040528 |
| Pd | 13.898179533037833 | 13.94973991248495 | 6.95878765908260  |
| Pd | 13.95653034114178  | 15.32710347893860 | 9.45313325665719  |
| Pd | 14.26474305748527  | 13.91425408620105 | 11.89534752161003 |
| Pd | 14.13625360445517  | 11.12068188531357 | 6.80921928763660  |
| Pd | 14.44819026462989  | 12.51117102825656 | 9.35348063517189  |
| Pd | 14.65525868758082  | 11.00512790337469 | 11.80498252227724 |
| Pd | 14.20210390433666  | 8.28808152673535  | 6.80985559313871  |
| Pd | 14.35985943793294  | 12.38939484407177 | 14.27859631665508 |
| Pd | 14.59713432425279  | 9.64728974012174  | 9.28586802690639  |
| Pd | 14.50345139198307  | 8.10548199832017  | 11.73267903237551 |
| Pd | 14.46229575853463  | 9.48353168106098  | 14.21234759451588 |
| Pd | 14.38759237483342  | 6.80875240322694  | 9.21114808405240  |
| Pd | 11.51468796374231  | 16.64828529869119 | 8.79389639612006  |
| Pd | 11.45378885474172  | 15.27377011062853 | 6.28989515812635  |
| Pd | 11.70024573258910  | 13.85383482121489 | 8.70245759152314  |
| Pd | 11.85417466362277  | 15.48223140659027 | 11.37373398352945 |
| Pd | 11.70619855088090  | 12.45632875402953 | 5.90900288359537  |
| Pd | 12.04534251094502  | 13.97270073214734 | 13.78460553263138 |
| Pd | 11.87792765101202  | 10.95638398945137 | 8.60728880534876  |
| Pd | 11.92694113842057  | 12.36332977961386 | 11.16899501114794 |
| Pd | 11.85578230293555  | 9.58510344394427  | 5.82492942259899  |
| Pd | 12.00136007636249  | 8.06138394836272  | 8.56163341033038  |
| Pd | 12.13974104559952  | 10.82309980991882 | 13.63047324703481 |
| Pd | 12.12936290144949  | 12.26446699810218 | 16.06645015062210 |
| Pd | 12.08106800404728  | 9.43450790868468  | 11.11080848790011 |
| Pd | 11.89931424027399  | 6.75157946310242  | 6.08554605582658  |
| Pd | 12.07903226619113  | 5.27120243260848  | 8.52460031234825  |
| Pd | 12.25625171487201  | 9.40914181804271  | 16.00135391971829 |
| Pd | 12.29931379003179  | 6.32010247343888  | 11.16876491368736 |
| Pd | 12.37714837123923  | 7.58545125946307  | 13.68438302432202 |
| Pd | 9.28377046796621   | 16.59354221638533 | 10.55586484106397 |
| Pd | 9.17799482233389   | 13.80453940031501 | 5.45345159106111  |
| Pd | 9.11039747085782   | 15.39021558219826 | 7.90693101396988  |
| Pd | 9.43631529237943   | 13.69329063537606 | 10.48999815649043 |
| Pd | 9.40097082224173   | 10.90837195772205 | 5.14840884715137  |
| Pd | 9.60054105702214   | 15.29626259446846 | 13.13562331784360 |
| Pd | 9.37361681367908   | 12.29960999490183 | 7.92101448823854  |
| Pd | 9.70684916809815   | 13.61140191711894 | 15.49647136709035 |
| Pd | 9.58758841630823   | 10.78708055370346 | 10.41036619793486 |
| Pd | 9.45744115017238   | 7.98771500439633  | 5.31749550960667  |
| Pd | 9.64346293538236   | 12.18695700398272 | 12.97915168020005 |
| Pd | 9.52620909875083   | 9.40037006212538  | 7.84236216373179  |
| Pd | 9.75380390625750   | 10.70783637808813 | 15.67325536875904 |
| Pd | 9.73285045148728   | 7.89326709648877  | 10.33214006964085 |
| Pd | 9.81539878605354   | 9.27060137240568  | 12.91564289799674 |
| Pd | 9.56491489694649   | 6.31123334994612  | 7.69001223520019  |
| Pd | 9.98784286257552   | 7.83930161247395  | 15.35843658570720 |
| Pd | 9.84799557918445   | 4.98656479414244  | 10.27060231865324 |
| Pd | 10.07156187771452  | 6.20475518724801  | 12.91963446791142 |
| Pd | 7.45966696029158   | 9.13255237357010  | 14.88803156770517 |
| Pd | 7.30467879565941   | 6.12158274058223  | 9.44428990122206  |
| Pd | 7.64290265048110   | 4.95861659906062  | 12.03497875411660 |
| Pd | 7.74844903219523   | 6.32151405487643  | 14.47521127896717 |

|    |                  |                   |                   |
|----|------------------|-------------------|-------------------|
| Pd | 7.48239003928784 | 7.73277220517911  | 12.12842368020342 |
| Pd | 7.23810425743647 | 9.21385175941366  | 9.65008078516393  |
| Pd | 7.29433127294940 | 12.01078475936086 | 14.98042085694978 |
| Pd | 7.29607103294214 | 10.62986885904481 | 12.19983795908796 |
| Pd | 7.10284172815008 | 7.61303330140522  | 7.00612493253783  |
| Pd | 7.08831260592915 | 12.12969384691412 | 9.72319411894669  |
| Pd | 7.03744921320739 | 9.36540902723855  | 4.75304227635320  |
| Pd | 7.26362713647531 | 14.84132501235682 | 14.72389074883979 |
| Pd | 7.03502872711907 | 10.73381485980274 | 7.19208925695715  |
| Pd | 7.16308131669012 | 13.52266211744543 | 12.26201475477053 |
| Pd | 6.85457913621858 | 15.23331675421224 | 9.67761871779769  |
| Pd | 6.89731056003582 | 12.22552998310792 | 4.81760096673191  |
| Pd | 6.80990012153314 | 13.84753297405740 | 7.15339677589366  |
| Pd | 7.05408718912975 | 16.31779742383821 | 12.29616837897611 |
| Pd | 5.19956960868173 | 6.26936744007872  | 11.35323815890067 |
| Pd | 5.26329012335626 | 7.65930282833915  | 13.84780942571483 |
| Pd | 4.72115055619129 | 9.09128849653869  | 11.45593563786209 |
| Pd | 5.01683645289371 | 10.48164700407883 | 13.99904882316766 |
| Pd | 4.88870930904611 | 7.68959689199812  | 8.91345042158905  |
| Pd | 4.55232369117830 | 11.94814967734546 | 11.51761817300849 |
| Pd | 4.79228689395514 | 9.20299342554850  | 6.51378022038530  |
| Pd | 4.49428246015051 | 10.57500858719797 | 9.00697207496177  |
| Pd | 4.95498552349634 | 13.31936328002038 | 13.98515813951418 |
| Pd | 4.75321410788728 | 14.78743338561573 | 11.55675381150646 |
| Pd | 4.65366434631228 | 12.06154475733793 | 6.57986576137649  |
| Pd | 4.61882481554947 | 13.48183778849079 | 9.03986818365724  |

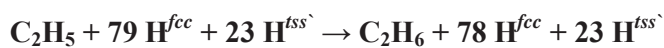

|   |                   |                   |                   |
|---|-------------------|-------------------|-------------------|
| C | 13.14560667636842 | 5.50410340037617  | 14.41645733659698 |
| C | 12.28161075316967 | 4.75105575659829  | 15.39763059893876 |
| H | 13.97633717408833 | 6.04082897764663  | 14.88750838440507 |
| H | 13.53390120540230 | 4.88203233150617  | 13.60561334847279 |
| H | 11.88275328718301 | 5.40104888433811  | 16.18649239284985 |
| H | 12.89717625658653 | 3.97684078037461  | 15.89006286047526 |
| H | 11.43653173858290 | 4.24135295572291  | 14.91637748211088 |
| H | 9.46770109689152  | 4.75047687088473  | 12.10022316423647 |
| H | 8.67141655661565  | 12.40599511456367 | 4.38468402749059  |
| H | 8.81566496801264  | 9.39256704072448  | 4.28453128228520  |
| H | 3.89716062425635  | 10.48665568797187 | 10.70676894901505 |
| H | 4.17198463793749  | 7.58963960940267  | 10.57921496667568 |
| H | 3.96946236649182  | 9.05442238865582  | 8.16793288307698  |
| H | 3.80748846569585  | 12.05636123280870 | 8.21798127590739  |
| H | 3.85127014411681  | 13.41994516408565 | 10.70197727869694 |
| H | 4.07658318578160  | 11.85417135365410 | 13.29747556162524 |
| H | 4.21919905163755  | 9.04774945354950  | 13.20846452008564 |
| H | 7.34315186022264  | 13.91511667915691 | 5.39964447945756  |
| H | 7.45462221328730  | 16.71380895415358 | 10.54351016232889 |
| H | 7.30827630814805  | 15.35439444474940 | 7.94240317472239  |
| H | 5.01945039302006  | 15.10881998190457 | 9.78232608838218  |
| H | 4.96414723562790  | 13.74903103467383 | 7.29293628548293  |
| H | 7.90824204717869  | 13.53174640612724 | 15.83113754743521 |
| H | 7.97363521246390  | 10.57983753877376 | 15.83773854994205 |
| H | 8.24934934006894  | 7.64291742135844  | 15.68194873814654 |
| H | 5.47521936781902  | 11.90960396947640 | 15.06402027629298 |
| H | 5.61016401467442  | 9.07002515624453  | 14.99155425339281 |



|   |                   |                   |                   |
|---|-------------------|-------------------|-------------------|
| H | 8.07243301576432  | 4.68541083324276  | 10.28847725445298 |
| H | 7.64632171373924  | 7.73293997740181  | 5.22176787573937  |
| H | 7.80214705035711  | 6.13296912935874  | 7.72086541779498  |
| H | 5.28403126135985  | 7.56013769257762  | 7.12138635298327  |
| H | 5.51333313698813  | 6.08816342269271  | 9.54342123265918  |
| H | 8.82294390975332  | 16.75406725292666 | 12.33062127874955 |
| H | 9.04035586515010  | 15.20339788667361 | 14.87879872477571 |
| H | 15.29815993152319 | 11.10721652751795 | 10.07840517056070 |
| H | 15.29777808045914 | 8.19052252215926  | 10.06148355976737 |
| H | 15.08606441861282 | 9.78217335915784  | 7.50034937336323  |
| H | 14.94204563123935 | 12.58456583848010 | 7.54808867844165  |
| H | 15.00075436916516 | 14.01276020147260 | 10.21901059417434 |
| H | 15.20940420059560 | 12.55691573893710 | 12.65587313337189 |
| H | 15.38094462251959 | 9.57179028914018  | 12.53827226070979 |
| H | 14.04908124552508 | 6.52630872209925  | 11.03195456825505 |
| H | 14.24103780969462 | 7.91407753633554  | 13.47565711918123 |
| H | 11.80379377701700 | 7.75403882875163  | 15.46258582124100 |
| H | 11.72157825017632 | 4.96956553694106  | 10.29319043444800 |
| H | 10.11570731108992 | 6.40899122917109  | 5.93393124696051  |
| H | 10.29792561467563 | 4.89083392982960  | 8.53061347790704  |
| H | 13.53466569369470 | 12.54177694852482 | 5.78609629739411  |
| H | 13.68392050624737 | 9.69660131514197  | 5.72659923037302  |
| H | 10.94145589896754 | 13.96339979012306 | 5.09750620581453  |
| H | 11.25469443938110 | 8.10168178519955  | 4.95360922073104  |
| H | 11.19222868798362 | 11.01086917426144 | 4.93798709861499  |
| H | 9.68279695699915  | 16.86945521211075 | 8.79071264950574  |
| H | 9.62520777452278  | 15.44702818734820 | 6.15271787369029  |
| H | 11.51104974345970 | 13.91884568033340 | 15.53840635020579 |
| H | 11.38333873865114 | 15.47538375122494 | 13.10431898095349 |
| H | 11.07375042006924 | 16.91156489342040 | 10.55705024222230 |
| H | 13.67345818034433 | 15.53171612501492 | 11.21288443297654 |
| H | 13.85718072135858 | 14.07711095670203 | 13.66432913196262 |
| H | 10.35090721766223 | 12.20773598796053 | 16.51406049864591 |
| H | 10.52067802005414 | 9.22745396965391  | 16.44846537058901 |
| H | 12.02773728242934 | 6.00983318781952  | 13.07331737732840 |
| H | 11.69946536246228 | 9.12446633554062  | 12.91450471074879 |
| H | 9.38409407502487  | 7.63514697997768  | 12.15873181578160 |
| H | 8.00281489149963  | 7.64179724761881  | 10.32922318934667 |
| H | 7.71826398467056  | 9.10605432267320  | 7.86371568892020  |
| H | 10.22110969989283 | 7.82937087088635  | 8.61712656767595  |
| H | 6.36103525372769  | 10.63295736297626 | 8.91860927976673  |
| H | 6.59244306941735  | 9.14490543711950  | 11.37066210094058 |
| H | 6.40112713231454  | 12.02172314500245 | 11.42522322764328 |
| H | 10.31606047177983 | 10.75143005779285 | 13.91562759630545 |
| H | 7.82496118929571  | 12.06948776050440 | 13.22810518079780 |
| H | 8.02049608061693  | 9.21561456920764  | 13.18538536982728 |
| H | 12.62264282918434 | 12.39589519507963 | 9.43770606825349  |
| H | 12.81118195764639 | 10.87192344390277 | 11.86186252809015 |
| H | 12.73800002633659 | 9.49910815015326  | 9.45047843963750  |
| H | 8.88611672347839  | 10.81845266904916 | 6.90101563541005  |
| H | 11.21088487602025 | 12.35014462198969 | 7.62432176485961  |
| H | 11.39112892222114 | 9.45689473931893  | 7.59118582842187  |
| H | 7.59890690814079  | 13.73218584808873 | 10.45505301353202 |
| H | 9.85449143261283  | 13.87963568616921 | 8.68589041000302  |
| H | 7.53721425261701  | 12.35558043437171 | 7.94427888272313  |
| H | 11.28138308339521 | 13.94222551897553 | 10.49068790603292 |
| H | 9.00880808743702  | 13.78187974193786 | 12.26879370524252 |

|    |                   |                   |                   |
|----|-------------------|-------------------|-------------------|
| H  | 11.49041079349083 | 12.40641516618881 | 12.94261119179626 |
| H  | 5.56303050563861  | 14.59673379587239 | 14.97932948947738 |
| H  | 5.34025107452588  | 9.07588101237459  | 4.89417078763713  |
| H  | 6.07462995383094  | 6.47819559385099  | 14.81776461949017 |
| H  | 13.80895860496188 | 5.33541914190939  | 8.59816812405041  |
| H  | 15.15060352069495 | 11.00188207299892 | 14.89269764195113 |
| H  | 13.22038586039870 | 16.77602922759565 | 8.89788949025899  |
| H  | 13.81213502517610 | 12.54905051011520 | 15.90200432661026 |
| H  | 12.66976786341153 | 10.85170381845680 | 16.87678652797447 |
| H  | 13.99099690766804 | 9.20890200532334  | 15.77907849323180 |
| H  | 3.99655830616366  | 10.62713537114932 | 5.91881626608019  |
| H  | 5.17587244358581  | 12.36356678849047 | 4.96909394614142  |
| H  | 6.50890967149904  | 10.80898917596906 | 3.92190675406707  |
| H  | 12.34083587527187 | 5.28467370165843  | 6.81616820057368  |
| H  | 13.59734467554296 | 6.99760556986420  | 5.86464996006098  |
| H  | 15.03339907969651 | 7.05749358397846  | 7.66509693956548  |
| H  | 14.59612548800726 | 15.24159378827813 | 7.82244313103538  |
| H  | 13.15042394765564 | 15.21940363943980 | 6.02450078486670  |
| H  | 11.79827122998008 | 16.75036086165480 | 7.09895939135713  |
| H  | 6.74465650874416  | 16.31747862496247 | 13.98903056497032 |
| H  | 5.32204895411316  | 16.28436816750788 | 12.18315615046903 |
| H  | 4.13150520413868  | 14.57091311284958 | 13.15928010524749 |
| H  | 4.63676230003075  | 6.32418685178141  | 12.96960198125869 |
| H  | 5.95402200765071  | 4.80905215689022  | 11.87007088629533 |
| H  | 7.36543023993958  | 4.84567165946969  | 13.73847875496623 |
| Pd | 13.90016149232609 | 13.95364656160561 | 6.92176502215162  |
| Pd | 13.95411201141670 | 15.31150347867060 | 9.42894967836462  |
| Pd | 14.25794456431020 | 13.92077581587668 | 11.88585802182705 |
| Pd | 14.12909400240121 | 11.13238424009185 | 6.77804876267404  |
| Pd | 14.46109767409504 | 12.51525185064258 | 9.32203330743217  |
| Pd | 14.65810018532951 | 11.05609796768112 | 11.76554228410937 |
| Pd | 14.19693077139921 | 8.29768532488184  | 6.81064453726159  |
| Pd | 14.36661741362139 | 12.40603578876184 | 14.27890067974960 |
| Pd | 14.59310017306281 | 9.67208489736166  | 9.26349338687116  |
| Pd | 14.56169512869569 | 8.15389569691203  | 11.72580163718347 |
| Pd | 14.53243361135893 | 9.55457533289431  | 14.18977099359165 |
| Pd | 14.37097230037086 | 6.82462677790025  | 9.24195188099452  |
| Pd | 11.50536825727981 | 16.63236345350165 | 8.79099891990279  |
| Pd | 11.44488509864820 | 15.27499117677783 | 6.27892400165902  |
| Pd | 11.70942042097442 | 13.82965440522487 | 8.67389260880504  |
| Pd | 11.84436186160330 | 15.45295779634850 | 11.35716806531380 |
| Pd | 11.70348379570665 | 12.46935832047762 | 5.85873314692444  |
| Pd | 12.03193744070650 | 13.95301291836928 | 13.78190369888877 |
| Pd | 11.87612494224965 | 10.94107199393298 | 8.60923614359912  |
| Pd | 11.93601882445916 | 12.35541379637995 | 11.15734251245469 |
| Pd | 11.85626951246207 | 9.60273265887558  | 5.81516370891360  |
| Pd | 12.01235631544331 | 8.07725766550567  | 8.57801420046924  |
| Pd | 12.14749828253245 | 10.81709768518186 | 13.62454776791418 |
| Pd | 12.12587743740339 | 12.26335396328954 | 16.06155149483607 |
| Pd | 12.07194931451843 | 9.41752253825252  | 11.12019983054594 |
| Pd | 11.89489106597678 | 6.77352955780941  | 6.07157888959629  |
| Pd | 12.09016400252106 | 5.32127094482279  | 8.52773833935192  |
| Pd | 12.27792588440163 | 9.41570599116879  | 15.99898244926514 |
| Pd | 12.24998452083303 | 6.46108177841095  | 11.14158833512484 |
| Pd | 12.42326216683992 | 7.54886110619961  | 13.73777914796517 |
| Pd | 9.27261003421244  | 16.58546913472489 | 10.55096028858540 |
| Pd | 9.16146723841491  | 13.80723063828185 | 5.45522107108090  |



|    |                   |                   |                   |
|----|-------------------|-------------------|-------------------|
| Pd | 9.10425112746871  | 15.37230011435896 | 7.90952450215780  |
| Pd | 9.44084786169612  | 13.68931688289091 | 10.47568666001178 |
| Pd | 9.40119516442474  | 10.91221086797285 | 5.14132260908472  |
| Pd | 9.58497172907663  | 15.29083368145678 | 13.13321404698678 |
| Pd | 9.38449771802806  | 12.28131753138918 | 7.90754643295884  |
| Pd | 9.69903158821706  | 13.61175399489588 | 15.50130589807885 |
| Pd | 9.60829130331719  | 10.76850957997575 | 10.42435660589857 |
| Pd | 9.46069831920820  | 8.01147347679801  | 5.29147061864052  |
| Pd | 9.65089103781239  | 12.19706095457321 | 12.97992251439787 |
| Pd | 9.53600667522318  | 9.38935276176331  | 7.85042734921150  |
| Pd | 9.76281738029480  | 10.69631986320867 | 15.67182544151715 |
| Pd | 9.79094918547210  | 7.89872623915531  | 10.36985769586795 |
| Pd | 9.82596778924564  | 9.27648957757262  | 12.93521591912005 |
| Pd | 9.58857974584648  | 6.35552054416789  | 7.69334712502878  |
| Pd | 9.99846860044054  | 7.82885441165645  | 15.36472050788805 |
| Pd | 9.87660552300324  | 5.03600243980458  | 10.28673742946477 |
| Pd | 10.09676391460146 | 6.21668421784773  | 12.94433974753738 |
| Pd | 7.45438511892315  | 9.13243098011831  | 14.92775032893688 |
| Pd | 7.34194779103369  | 6.15769254059059  | 9.45581264520382  |
| Pd | 7.66729734717815  | 4.97213380893049  | 12.04193103065813 |
| Pd | 7.75441121896298  | 6.32751734061470  | 14.49624397640665 |
| Pd | 7.50455241527267  | 7.73665871999879  | 12.14314814176782 |
| Pd | 7.26673782526813  | 9.21010516035283  | 9.65218750882523  |
| Pd | 7.30543871412194  | 12.01178137394637 | 14.98544752127421 |
| Pd | 7.31341936295068  | 10.62126967912743 | 12.21498549532844 |
| Pd | 7.11549553854995  | 7.62326727517498  | 6.98552371977935  |
| Pd | 7.11313522164492  | 12.11199814528299 | 9.72624690948848  |
| Pd | 7.03345848050197  | 9.37775614438448  | 4.73516744003558  |
| Pd | 7.25756422005420  | 14.84405175560979 | 14.72603570382299 |
| Pd | 7.04379214132658  | 10.72852523439908 | 7.18625611038278  |
| Pd | 7.16557064343992  | 13.51463609703717 | 12.25890886464185 |
| Pd | 6.85020043849827  | 15.21611845355451 | 9.67587691962582  |
| Pd | 6.88779581380135  | 12.22878219635450 | 4.81430031563014  |
| Pd | 6.79366749086184  | 13.84127123247837 | 7.15219115782321  |
| Pd | 7.04665572990958  | 16.31853274705945 | 12.29355991297817 |
| Pd | 5.21736358251599  | 6.28002450862328  | 11.35524078963385 |
| Pd | 5.27700355934929  | 7.65859073782813  | 13.85394950582581 |
| Pd | 4.73661156394570  | 9.09334922313642  | 11.45592603745144 |
| Pd | 5.02927303659579  | 10.47489567980163 | 14.00095461131463 |
| Pd | 4.92074304560868  | 7.69061616587993  | 8.91031783792586  |
| Pd | 4.56348783823073  | 11.94645494358621 | 11.53442263880798 |
| Pd | 4.79363287339431  | 9.21906943722362  | 6.52035169206069  |
| Pd | 4.52171991073947  | 10.57390764490709 | 9.02011426530933  |
| Pd | 4.96495116234593  | 13.31501293082699 | 14.00028542949363 |
| Pd | 4.75520184631554  | 14.78356009243345 | 11.56855168367906 |
| Pd | 4.65206327550816  | 12.06696980539851 | 6.58753366152501  |
| Pd | 4.61545657935697  | 13.47313541340672 | 9.05464144799172  |

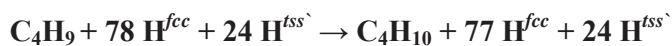

|   |                   |                  |                   |
|---|-------------------|------------------|-------------------|
| C | 13.26475790692705 | 5.50406407118802 | 14.38504216553388 |
| C | 12.34738311316649 | 4.85524005793568 | 15.41036256265500 |
| C | 14.58677422589361 | 6.03157637329431 | 14.90559492396619 |
| C | 12.94165652832134 | 3.55298850642471 | 15.97363484051786 |
| H | 13.45754969219587 | 4.80530451286656 | 13.56092342877029 |
| H | 12.14274118549314 | 5.55558065013169 | 16.23361169884094 |

|   |                   |                   |                   |
|---|-------------------|-------------------|-------------------|
| H | 11.37361356873093 | 4.63097100421633  | 14.94709526265073 |
| H | 9.46035620102026  | 4.75576331518586  | 12.10745299892594 |
| H | 8.66453655048490  | 12.40148506612046 | 4.37913736551654  |
| H | 8.81264397377893  | 9.37609001433805  | 4.31440453776659  |
| H | 3.87930563506497  | 10.48590135763541 | 10.69199085698791 |
| H | 4.15055788501244  | 7.58249408372304  | 10.59763590527155 |
| H | 3.94409811046706  | 9.05544574956307  | 8.14081761670886  |
| H | 3.79953321603109  | 12.08837457887522 | 8.20812365101054  |
| H | 3.83938396996295  | 13.43136069917932 | 10.67895928412899 |
| H | 4.05336298303502  | 11.87014914886652 | 13.27328004226174 |
| H | 4.21131867372791  | 9.06269404864804  | 13.21433785100573 |
| H | 7.35984302981708  | 13.91250926012803 | 5.39326668111639  |
| H | 7.46141423290544  | 16.74124575110114 | 10.52922140621542 |
| H | 7.30377309433814  | 15.37237328509163 | 7.94014849522497  |
| H | 5.01012642810825  | 15.11783488915576 | 9.75556310556456  |
| H | 4.97990767833795  | 13.73745238526305 | 7.24603436559830  |
| H | 7.90254882937188  | 13.54489422956254 | 15.81869278330144 |
| H | 7.95716941043726  | 10.59653507372640 | 15.82323065493592 |
| H | 8.24671841158093  | 7.64964025778214  | 15.65490317605063 |
| H | 5.44244689258674  | 11.95319073527812 | 15.04855642856803 |
| H | 5.62415502069881  | 9.07587098117478  | 14.97430637384604 |
| H | 8.05804136116768  | 4.67823921949862  | 10.28660475114806 |
| H | 7.64127066021448  | 7.71163035140194  | 5.26258032100195  |
| H | 7.78140754454524  | 6.10844659066100  | 7.72059070607423  |
| H | 5.26507417855157  | 7.54256788747815  | 7.13654981143143  |
| H | 5.47022580167409  | 6.10494763095960  | 9.52286273608192  |
| H | 8.81282818833031  | 16.76647137555997 | 12.32075439265224 |
| H | 9.03183053008722  | 15.21861140250287 | 14.86470625669040 |
| H | 15.24703993020928 | 11.12404457290070 | 10.11967497292608 |
| H | 15.28626936434012 | 8.18242758999796  | 10.09347191661998 |
| H | 15.09460132452953 | 9.74373687025601  | 7.54863579501524  |
| H | 14.92724427814871 | 12.58009892012069 | 7.57999726887321  |
| H | 14.99451102453269 | 14.05991726721732 | 10.20829775829385 |
| H | 15.18956481691053 | 12.58992459280189 | 12.65651753958035 |
| H | 15.30444368041364 | 9.50192427414458  | 12.58620895947737 |
| H | 14.10828142324528 | 6.51848654846590  | 11.01970882721272 |
| H | 11.84637596536033 | 7.78596052852547  | 15.45299953740037 |
| H | 11.66185318622910 | 4.86977449970471  | 10.29158069666277 |
| H | 10.12342498576550 | 6.38659838715918  | 5.95527142223641  |
| H | 10.28263762065223 | 4.85079034802026  | 8.53446574977794  |
| H | 13.52680523646836 | 12.54911551011255 | 5.84186112978120  |
| H | 13.68338416226101 | 9.68877383613948  | 5.75925201853917  |
| H | 10.98780304429763 | 13.95499347640420 | 5.11727558489038  |
| H | 11.24801742440314 | 8.07424847857015  | 4.98843397843861  |
| H | 11.18414740925197 | 11.02051285496792 | 4.97558694600313  |
| H | 9.67315571306986  | 16.89809323610864 | 8.78132309676558  |
| H | 9.62606812165453  | 15.44167140174963 | 6.13704404656895  |
| H | 11.49611902465888 | 13.95032532860519 | 15.52597386504004 |
| H | 11.37870288179984 | 15.52348207325963 | 13.12104929441649 |
| H | 11.05946985265337 | 16.94791916184308 | 10.54311027473012 |
| H | 13.66948785825939 | 15.54417258449133 | 11.25885853537338 |
| H | 13.84465271330316 | 14.12456911661450 | 13.65200325754818 |
| H | 10.33653923469806 | 12.24404497385735 | 16.51835358951886 |
| H | 5.50384469848175  | 9.24802269914193  | 16.45792427796851 |
| H | 12.18762034494237 | 6.02417389486883  | 13.05750856035336 |
| H | 11.71467351266959 | 9.13266725934161  | 12.94623979901251 |
| H | 9.36184540782491  | 7.62299457199727  | 12.16025108242752 |

|    |                   |                   |                   |
|----|-------------------|-------------------|-------------------|
| H  | 7.90317074574752  | 7.62980958334069  | 10.32432970726746 |
| H  | 7.69695794184318  | 9.12271470609874  | 7.87235102866140  |
| H  | 10.15601569502278 | 7.82756338850673  | 8.56539185533272  |
| H  | 6.31585039424233  | 10.65629804717118 | 8.92191105496702  |
| H  | 6.55954671919613  | 9.15812722937768  | 11.37362235479869 |
| H  | 6.37741483752989  | 12.04030432149950 | 11.42960880271033 |
| H  | 10.28719722851213 | 10.75005134677366 | 13.92372057752542 |
| H  | 7.80959049685639  | 12.08093684136614 | 13.23234785758062 |
| H  | 8.02706774067344  | 9.23967146209256  | 13.15228981566252 |
| H  | 12.61070210076861 | 12.43224923937142 | 9.46643483451111  |
| H  | 12.82041362944994 | 10.94597857653616 | 11.90132509642904 |
| H  | 12.74300709258231 | 9.55836266079622  | 9.44631486093517  |
| H  | 8.87116443303354  | 10.84375624186194 | 6.89836103976632  |
| H  | 11.19465787061024 | 12.39713919196538 | 7.67457546060624  |
| H  | 11.35578509219053 | 9.51566805430396  | 7.59565210284115  |
| H  | 7.57772037268885  | 13.75739249793031 | 10.45401118354750 |
| H  | 9.82577600245368  | 13.91269359790514 | 8.69596869722391  |
| H  | 7.51873349662229  | 12.36038448361203 | 7.94765205633149  |
| H  | 11.25273208731189 | 13.98333682566139 | 10.52417160012506 |
| H  | 8.99579594740623  | 13.78989162902234 | 12.27559238646120 |
| H  | 11.46740965709047 | 12.43168818328601 | 12.95810551699290 |
| H  | 5.55044270972652  | 14.60490923389958 | 14.96019803988279 |
| H  | 5.33912202834574  | 9.06370481169083  | 4.88896282938121  |
| H  | 6.07887804962579  | 6.50425693334489  | 14.82303548724528 |
| H  | 13.79348724075603 | 5.30409943950839  | 8.66020358719179  |
| H  | 15.15066619464973 | 10.99750451568828 | 14.77572484349538 |
| H  | 13.20997729442342 | 16.81226876282529 | 8.89641120315492  |
| H  | 13.80242733752523 | 12.51146107609316 | 15.91101212816682 |
| H  | 12.59283054120391 | 10.88194109463936 | 16.91325079516309 |
| H  | 13.97295020068637 | 9.30390753472939  | 15.84760578235911 |
| H  | 3.98264356992246  | 10.61132890038442 | 5.92825281213815  |
| H  | 5.17689368062581  | 12.32892728046573 | 4.95513619066813  |
| H  | 6.54821922856430  | 10.79174253005490 | 3.91986884809670  |
| H  | 12.38311890741125 | 5.27203038970065  | 6.84781491942550  |
| H  | 13.59297757037209 | 7.02182596761395  | 5.85490480408203  |
| H  | 15.03825295981613 | 7.03476565027931  | 7.64855699286838  |
| H  | 14.59504858115996 | 15.25879550363492 | 7.85406189266576  |
| H  | 13.15246994484512 | 15.23214997398950 | 6.05331231731702  |
| H  | 11.78399135507134 | 16.77236319838430 | 7.08994199576496  |
| H  | 6.71326072533926  | 16.32441676091562 | 13.97040343506736 |
| H  | 5.31176033647735  | 16.30730447180025 | 12.13385403744392 |
| H  | 4.12080101232242  | 14.60372181298259 | 13.13443524035906 |
| H  | 4.61657608910824  | 6.33564233224305  | 12.96792904442538 |
| H  | 5.94143270618622  | 4.80704673795105  | 11.87259539480910 |
| H  | 7.34637053050872  | 4.85325271838662  | 13.73924700352500 |
| H  | 11.58234784121760 | 7.81651470749399  | 10.38906734481926 |
| H  | 15.16952736388825 | 6.54734353768362  | 14.12775008272192 |
| H  | 15.20284579737284 | 5.17459482178345  | 15.23719223296313 |
| H  | 14.46552246459440 | 6.70851646240858  | 15.76044726375280 |
| H  | 12.22135435919916 | 3.06831590040840  | 16.64618088665179 |
| H  | 13.85956208306352 | 3.73591261604295  | 16.54740883588893 |
| H  | 13.17953229024942 | 2.84216974638446  | 15.16943295899697 |
| Pd | 13.89027136253780 | 13.96118064397435 | 6.95606102432824  |
| Pd | 13.94244315308872 | 15.34583881482268 | 9.44436994407083  |
| Pd | 14.24786437762964 | 13.94637654009165 | 11.89398342419350 |
| Pd | 14.13033703297115 | 11.13210121666723 | 6.81532230487448  |
| Pd | 14.43811741833991 | 12.53232275357270 | 9.35637609758414  |

|    |                   |                   |                    |
|----|-------------------|-------------------|--------------------|
| Pd | 14.64445044061644 | 11.03894070764641 | 11.81153758730470  |
| Pd | 14.20107571736829 | 8.29930869165320  | 6.82418090310893   |
| Pd | 14.34180374519276 | 12.42941503690243 | 14.28019743879164  |
| Pd | 14.59195761666469 | 9.66796376371694  | 9.29618787992440   |
| Pd | 14.50083288543394 | 8.13893564820014  | 11.74717028372705  |
| Pd | 14.45561519111506 | 9.53295594579735  | 14.22629594649839  |
| Pd | 14.39006068563708 | 6.82859462580091  | 9.23021916913399   |
| Pd | 11.49898212739070 | 16.66227881495311 | 8.78085015600688   |
| Pd | 11.44512571106453 | 15.27996049669739 | 6.28284396771466   |
| Pd | 11.68956329389198 | 13.86580863029720 | 8.69984708501725   |
| Pd | 11.83630267956801 | 15.49948839069564 | 11.36275488138179  |
| Pd | 11.70007403980315 | 12.46125876592132 | 5.91227844695721   |
| Pd | 12.02380244332131 | 13.99472078416747 | 13.77921558001409  |
| Pd | 11.87136397077259 | 10.96712368303317 | 8.61772887612686   |
| Pd | 11.91819575294827 | 12.37939580965336 | 11.17268310490701  |
| Pd | 11.85453582338831 | 9.59142412024329  | 5.83395386323890   |
| Pd | 11.99993655164506 | 8.07480449340408  | 8.57282166970284   |
| Pd | 12.12782636237607 | 10.83566630135956 | 13.63712481416061  |
| Pd | 12.10742610136685 | 12.29210176344074 | 16.06525067592812  |
| Pd | 12.07506005822380 | 9.44582999947465  | 11.12865198320258  |
| Pd | 11.90188039377148 | 6.75848858889240  | 6.09772826821417   |
| Pd | 12.08511753606454 | 5.28599124814086  | 8.53964772029000   |
| Pd | 12.24884070544527 | 9.43531278732548  | 16.01389881639005  |
| Pd | 12.30048494429237 | 6.34340178652111  | 11.18230671543816  |
| Pd | 12.39748690197831 | 7.57586357643455  | 13.71835777083081  |
| Pd | 9.26698743039853  | 16.60518445655880 | 10.54156042782682  |
| Pd | 9.17349453704137  | 13.80398040542458 | 5.44687966740857   |
| Pd | 9.09968094901821  | 15.39574309429589 | 7.89648108964380   |
| Pd | 9.42530847960307  | 13.70145130289361 | 10.48663334819612  |
| Pd | 9.39935124463047  | 10.90742080745826 | 5.14847259223756   |
| Pd | 9.57772383761731  | 15.31019945599556 | 13.12327835056596  |
| Pd | 9.36672616948543  | 12.30560425411699 | 7.91947385321834   |
| Pd | 9.68415380553379  | 13.63407781643988 | 15.48979337047664  |
| Pd | 9.58098222340908  | 10.79609960189604 | 10.41436281189930  |
| Pd | 9.45845094387739  | 7.98914985912835  | 5.32509927338443   |
| Pd | 9.63335239790672  | 12.19884820425893 | 12.97963313385255  |
| Pd | 9.52220778165636  | 9.40758845824736  | 7.84732972595342   |
| Pd | 9.74213353810329  | 10.72607885535927 | 15.67705084291906  |
| Pd | 9.72827170512013  | 7.90635844728934  | 10.33840347345789  |
| Pd | 9.81677488172260  | 9.28052353954333  | 12.91907836045803  |
| Pd | 9.56829868596961  | 6.31722831664793  | 7.70074014319755   |
| Pd | 9.99705864262652  | 7.85335876102281  | 15.36147905829109  |
| Pd | 9.85576169514475  | 5.00440916114932  | 10.28651207485352  |
| Pd | 10.08806711835872 | 6.22342174702069  | 12.93734945913106  |
| Pd | 7.46021531392537  | 9.14871911828053  | 14.89172996230773  |
| Pd | 7.30705289248851  | 6.13010190779533  | 9.45310911900682   |
| Pd | 7.65066193839438  | 4.97765243142514  | 12.04861117076888  |
| Pd | 7.75466387295560  | 6.34147489802684  | 14.48408249085111  |
| Pd | 7.48225092148680  | 7.74690618693686  | 12.13379869661786  |
| Pd | 7.23024437330499  | 9.22197050014651  | 9.65131260653303   |
| Pd | 7.28059058527272  | 12.02946712984517 | 14.977294618830292 |
| Pd | 7.29186439226571  | 10.64041916215517 | 12.19869988824593  |
| Pd | 7.10116543915544  | 7.61548963661450  | 7.01112347321154   |
| Pd | 7.08012872573937  | 12.13571109422977 | 9.71914119794400   |
| Pd | 7.03711719849435  | 9.36172001474414  | 4.75356186138155   |
| Pd | 7.24148187195355  | 14.86135648709336 | 14.71200255334482  |
| Pd | 7.03045320460991  | 10.73691589827315 | 7.18965508246115   |

|    |                  |                   |                   |
|----|------------------|-------------------|-------------------|
| Pd | 7.14879644503336 | 13.53187852411508 | 12.25583977811242 |
| Pd | 6.84250891919417 | 15.23916556471005 | 9.66552564939978  |
| Pd | 6.89505014946048 | 12.22279794862426 | 4.81102865636447  |
| Pd | 6.80403439558040 | 13.85033791350314 | 7.14340931902496  |
| Pd | 7.03604508480070 | 16.33146930720614 | 12.28001449151972 |
| Pd | 5.20136858725996 | 6.27836008624374  | 11.35944680411270 |
| Pd | 5.26615487110339 | 7.67249654277749  | 13.85229917029296 |
| Pd | 4.71628676609966 | 9.09997386410458  | 11.45594742959374 |
| Pd | 5.01146837414487 | 10.49432854141792 | 13.99509819661400 |
| Pd | 4.88564205850178 | 7.69387489684151  | 8.91619577389525  |
| Pd | 4.54195215493423 | 11.95775581931019 | 11.51058591324773 |
| Pd | 4.78948173504493 | 9.20294781570944  | 6.51235569504636  |
| Pd | 4.48669460448471 | 10.57960792687661 | 9.00243462465337  |
| Pd | 4.93798588607606 | 13.33225790946300 | 13.97604428769564 |
| Pd | 4.74000631537834 | 14.79721268349192 | 11.54469604360679 |
| Pd | 4.64924066304645 | 12.06351655958414 | 6.57275206158448  |
| Pd | 4.61126629445191 | 13.48820228751381 | 9.02956604018202  |

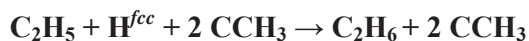

|    |                   |                   |                   |
|----|-------------------|-------------------|-------------------|
| C  | 13.02280159327642 | 6.14156701291777  | 14.71431126910823 |
| C  | 12.47934266750809 | 4.77649028425939  | 15.11490299455041 |
| C  | 9.56404602473091  | 4.56260540306715  | 11.96871134811553 |
| C  | 14.96649513262564 | 5.17958297548779  | 11.39101452620797 |
| C  | 9.95380705955261  | 3.22724880274780  | 12.49797023160084 |
| C  | 14.20949190511013 | 6.38195753810657  | 10.94132618951816 |
| H  | 14.74561482158871 | 4.93160813109261  | 12.44108098630020 |
| H  | 16.05116950085590 | 5.35497254048198  | 11.30536978403951 |
| H  | 14.71117256621902 | 4.30409094982988  | 10.77353044435359 |
| H  | 9.59471583561415  | 3.08914661522255  | 13.52990672416196 |
| H  | 11.04810799904241 | 3.10502401795590  | 12.49166221346700 |
| H  | 9.52099240876077  | 2.42812001859388  | 11.87433046062967 |
| H  | 13.11716894358617 | 6.79598533488125  | 15.59119405235517 |
| H  | 13.97877986719987 | 6.07014818405581  | 14.18532563387817 |
| H  | 13.18024259059658 | 4.31140732773379  | 15.82774896531152 |
| H  | 12.37783907515027 | 4.09664642589585  | 14.25889823663398 |
| H  | 11.50096711654828 | 4.85119120591393  | 15.60666159441184 |
| H  | 11.76071664020172 | 6.25546613413820  | 13.67775159728384 |
| Pd | 13.64780260590380 | 13.92282140696188 | 7.13993694587021  |
| Pd | 13.70281602568659 | 15.19419343529263 | 9.53111946395766  |
| Pd | 13.93050851692567 | 13.81035482024039 | 11.82410658869192 |
| Pd | 13.85694301295349 | 11.24989127466428 | 6.98870495554868  |
| Pd | 14.09750403147411 | 12.50938567146750 | 9.41550074449873  |
| Pd | 14.21837922268195 | 11.03285837707005 | 11.67375451202153 |
| Pd | 13.95200469054866 | 8.55983133746082  | 6.85153462990461  |
| Pd | 14.02185759407276 | 12.31530581174777 | 14.06039101103242 |
| Pd | 14.15985465958375 | 9.80322814610776  | 9.28872024660446  |
| Pd | 14.38730481244014 | 8.21126877773941  | 11.64375073921405 |
| Pd | 14.24718565425462 | 9.61746855922250  | 13.97970651334776 |
| Pd | 14.17824004422011 | 7.06184743366215  | 9.09873026986954  |
| Pd | 11.36486228419160 | 16.41433160651318 | 8.89189186858029  |
| Pd | 11.31580799286594 | 15.15237581346252 | 6.48983421251408  |
| Pd | 11.55301808087405 | 13.70491402581110 | 8.81438075095703  |
| Pd | 11.61718297475889 | 15.16158648156362 | 11.27151326448976 |
| Pd | 11.52486027418393 | 12.48032975284226 | 6.22228371845711  |

|    |                   |                   |                   |
|----|-------------------|-------------------|-------------------|
| Pd | 11.75675844947309 | 13.69281060067931 | 13.51754185199977 |
| Pd | 11.75404382456645 | 11.02226889739733 | 8.68230044496071  |
| Pd | 11.80879133102592 | 12.27700037399480 | 11.11084029274834 |
| Pd | 11.64549786849443 | 9.80849083111240  | 6.16582851032017  |
| Pd | 11.81534314200380 | 8.30312673352213  | 8.59263894100354  |
| Pd | 11.89756686925421 | 10.78938267131061 | 13.35507813383892 |
| Pd | 11.88623692772342 | 12.16613869425603 | 15.73427525015782 |
| Pd | 11.99704525427958 | 9.42651968394833  | 11.04391488551298 |
| Pd | 11.75149717927687 | 7.09862165335221  | 6.17061362432534  |
| Pd | 11.94598438435137 | 5.55680885026076  | 8.40008545036249  |
| Pd | 12.05814004026715 | 9.48592757344682  | 15.68210035579836 |
| Pd | 12.23061468256655 | 6.57014042415131  | 10.97143192516641 |
| Pd | 12.23537618452099 | 7.82779833608936  | 13.51064813640567 |
| Pd | 9.23510858016081  | 16.31552262240555 | 10.53711911123776 |
| Pd | 9.15458525669114  | 13.75321045617921 | 5.69427354013993  |
| Pd | 9.14665289904506  | 15.06790998129160 | 8.09746070778828  |
| Pd | 9.42100334138280  | 13.57798289576727 | 10.48584928600030 |
| Pd | 9.35788240256596  | 11.02908983606358 | 5.49398471085034  |
| Pd | 9.48452924374755  | 15.00467037877895 | 12.92410843180230 |
| Pd | 9.37556234589432  | 12.27228655518205 | 8.01713884157974  |
| Pd | 9.59400387332134  | 13.49029317235020 | 15.20416780893294 |
| Pd | 9.58696458887816  | 10.77105605814944 | 10.39825525566577 |
| Pd | 9.43560948468756  | 8.29740747872526  | 5.51389086200737  |
| Pd | 9.58136109074038  | 12.13198670872489 | 12.83649952311533 |
| Pd | 9.48364113156869  | 9.50755205997177  | 7.93013886663633  |
| Pd | 9.68597155728123  | 10.72417343945327 | 15.18715396677813 |
| Pd | 9.76203661837885  | 7.95079618738152  | 10.31268248832987 |
| Pd | 9.80245853376452  | 9.27716055464775  | 12.72295309066515 |
| Pd | 9.57961165121556  | 6.72899583361517  | 7.79903412602874  |
| Pd | 9.87997462056787  | 7.95688281541004  | 15.01696597192448 |
| Pd | 9.92579107521724  | 5.21555583201074  | 10.15036084102464 |
| Pd | 10.04973700996682 | 6.34382576984159  | 12.73563415691708 |
| Pd | 7.54024111308754  | 9.29081375163137  | 14.50539628310669 |
| Pd | 7.48341126555365  | 6.56621494566888  | 9.46833811025178  |
| Pd | 7.71836150988715  | 5.23820520696204  | 11.85653623173996 |
| Pd | 7.70141835175172  | 6.57600000802057  | 14.28346653125511 |
| Pd | 7.60581441304452  | 7.96988194614723  | 11.97082839113427 |
| Pd | 7.34752771410030  | 9.32324075939911  | 9.64293108015185  |
| Pd | 7.36344431764886  | 11.98714683160748 | 14.65107277231386 |
| Pd | 7.38675526013671  | 10.68949040693925 | 12.12141862296294 |
| Pd | 7.25020842860324  | 7.91317686442680  | 7.13411439995250  |
| Pd | 7.18262322280250  | 12.08320956988988 | 9.73352871566984  |
| Pd | 7.12762723942210  | 9.55322875061353  | 4.96829289208667  |
| Pd | 7.29349874285041  | 14.69205888897062 | 14.50438963305679 |
| Pd | 7.18776547318164  | 10.78251505223788 | 7.35563683453705  |
| Pd | 7.27197353357363  | 13.37978638551739 | 12.13164008758157 |
| Pd | 7.02329534608334  | 14.90573246788863 | 9.73981600705601  |
| Pd | 7.00346377962507  | 12.26045525961129 | 5.04685402207324  |
| Pd | 6.98456861170315  | 13.62489550806333 | 7.37025674257737  |
| Pd | 7.11939741322520  | 16.09369717667761 | 12.18441916725033 |
| Pd | 5.40009992117045  | 6.53604423815610  | 11.24096688617078 |
| Pd | 5.41431478313240  | 7.86431426504439  | 13.61615519326391 |
| Pd | 5.12516088062110  | 9.25436624451063  | 11.31740498701954 |
| Pd | 5.20875433371986  | 10.54796791543296 | 13.74344434294651 |
| Pd | 5.15646801434519  | 7.89397955002376  | 8.92089794952002  |
| Pd | 4.90644790621722  | 11.92756787994816 | 11.39113242429362 |
| Pd | 5.00327080606261  | 9.32999227216348  | 6.64325728467634  |



|    |                  |                   |                   |
|----|------------------|-------------------|-------------------|
| Pd | 4.87091822340575 | 10.62896913151014 | 9.02054597152272  |
| Pd | 5.12655530639447 | 13.23372165314412 | 13.76191291978755 |
| Pd | 4.94529075723315 | 14.62913588345605 | 11.44183435886731 |
| Pd | 4.87188164412984 | 12.04392189666202 | 6.72146508764509  |
| Pd | 4.85046683400888 | 13.37270040525296 | 9.06590312121198  |

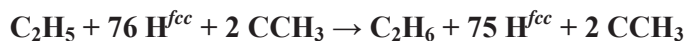

|   |                   |                   |                   |
|---|-------------------|-------------------|-------------------|
| C | 13.09409209440147 | 5.76020339075698  | 14.48614497652186 |
| C | 12.60971550436139 | 5.29244941492270  | 15.83881296021816 |
| C | 9.76499675554096  | 4.52349394869775  | 12.36958721562559 |
| C | 15.05188956659864 | 5.06421954211510  | 11.75970871972457 |
| C | 10.34209082684947 | 3.27464970957162  | 12.92678462944396 |
| C | 14.26991380396834 | 6.21571958014436  | 11.24587811917433 |
| H | 14.53938903412528 | 4.11520626598702  | 11.54026151838320 |
| H | 15.22263923665179 | 5.13096269592314  | 12.84539081830615 |
| H | 16.03824373410809 | 5.03122374166987  | 11.26835775253906 |
| H | 10.02522206695226 | 3.13689545218968  | 13.97159725650168 |
| H | 11.44238795734973 | 3.29133911273625  | 12.89161639402282 |
| H | 10.00220351578420 | 2.39721085276446  | 12.35252941447374 |
| H | 14.06470916082527 | 6.26919868978370  | 14.52127888749216 |
| H | 13.13602612422271 | 4.95788289576904  | 13.74371682258188 |
| H | 11.58815221131964 | 4.89115267922429  | 15.80665108499816 |
| H | 12.63605002208292 | 6.09293559859095  | 16.58716217303341 |
| H | 13.27419871552720 | 4.48499058866935  | 16.19236204474683 |
| H | 8.76487304676279  | 12.21554711499629 | 4.55803613365004  |
| H | 8.91355918621666  | 9.42273327605100  | 4.51060948653425  |
| H | 4.18204365173436  | 10.43689039425432 | 10.76361138172283 |
| H | 4.35130561247779  | 7.64379772922012  | 10.71267532804101 |
| H | 4.11890103492540  | 9.05892854207956  | 8.31233469822240  |
| H | 3.95978368614812  | 11.86286256585441 | 8.36494106400583  |
| H | 4.01809163551679  | 13.21677994015815 | 10.79957921312283 |
| H | 4.21284645894039  | 11.78232997576131 | 13.21432334746774 |
| H | 4.38077899740625  | 8.99332446890473  | 13.16316288676937 |
| H | 7.37053537823671  | 13.77833551652637 | 5.62081586264171  |
| H | 7.47378739464600  | 16.50082221619455 | 10.53344426028098 |
| H | 7.42292578609023  | 15.13402113570770 | 8.07563272911232  |
| H | 5.22158325915431  | 14.97460249732703 | 9.80762554428686  |
| H | 5.16591755541359  | 13.60991625442134 | 7.35998126500710  |
| H | 7.92028127584649  | 13.36220146102735 | 15.77740860108868 |
| H | 8.06522303408978  | 10.57726656300075 | 15.71772749480036 |
| H | 8.25842356472144  | 7.73071951639559  | 15.62570534693297 |
| H | 5.66640041729896  | 11.83394807513201 | 15.06187942556084 |
| H | 5.82109753821925  | 9.04047242103808  | 15.00540999180556 |
| H | 8.11197793153189  | 4.76202925757206  | 10.28213715312216 |
| H | 7.71883775656413  | 7.65411667735267  | 5.51216173645750  |
| H | 7.94245454850098  | 6.21281475283434  | 7.92991577165636  |
| H | 5.51649901447421  | 7.48700396795917  | 7.24914121752563  |
| H | 5.72793202671328  | 6.06691288229983  | 9.65300540161255  |
| H | 8.92362286258485  | 16.55170755546173 | 12.37162030510918 |
| H | 9.12142831250658  | 15.12074842212217 | 14.78697055565612 |
| H | 15.06828528922861 | 11.04482208473115 | 10.19892294172180 |
| H | 15.27954817142086 | 8.31133381936412  | 10.04272118902931 |
| H | 15.04209669171629 | 9.70294150238612  | 7.69474505286282  |
| H | 14.89031231075725 | 12.50002452408840 | 7.78616773153705  |
| H | 14.92660440251905 | 13.85538953842159 | 10.24883160098736 |

|    |                   |                   |                   |
|----|-------------------|-------------------|-------------------|
| H  | 15.10497832499157 | 12.40494152640587 | 12.63900007385296 |
| H  | 15.26759160717112 | 9.63987953191156  | 12.64420756577917 |
| H  | 11.67705924623808 | 6.15449068705003  | 13.71464760671954 |
| H  | 11.85752865336131 | 7.87424465386361  | 15.43395140022927 |
| H  | 11.79728976281561 | 4.93560790970664  | 10.38574791844196 |
| H  | 10.13469340122256 | 6.40569327418488  | 6.16763755058147  |
| H  | 10.36591243033438 | 4.96041235252762  | 8.50756257106294  |
| H  | 13.42530311751625 | 12.46100209877098 | 5.93706285329487  |
| H  | 13.56591155772632 | 9.69093404617995  | 5.87263779525092  |
| H  | 11.00478514682577 | 13.72927507612431 | 5.28245126937487  |
| H  | 11.32906602934287 | 8.13559403670150  | 5.16651089955368  |
| H  | 11.16177554636868 | 10.94957608906017 | 5.23184629458014  |
| H  | 9.67473195238765  | 16.65175004415460 | 8.79641765929335  |
| H  | 9.61499027841344  | 15.29262174251278 | 6.34122299316755  |
| H  | 11.51117253679772 | 13.86772435656179 | 15.42579445511018 |
| H  | 11.30847521860587 | 15.25045053315609 | 13.02910883794156 |
| H  | 11.11806058714820 | 16.69862276082669 | 10.65186184009886 |
| H  | 13.52060553248260 | 15.42140551654155 | 11.30209534734504 |
| H  | 13.72510253953803 | 13.97071882561406 | 13.69035716730013 |
| H  | 10.34162676492183 | 12.11340998019960 | 16.47194408217331 |
| H  | 10.44792333405472 | 9.30735968777629  | 16.40651333695975 |
| H  | 5.61801095757050  | 14.54134766938584 | 14.96435077406829 |
| H  | 5.43506038403749  | 8.96806471625194  | 5.01606766253150  |
| H  | 6.15417714538239  | 6.43438385887655  | 14.87002402761657 |
| H  | 13.87559300726103 | 5.28812979106749  | 8.66534795689985  |
| H  | 15.12318413685310 | 10.92506206781436 | 14.87451852990010 |
| H  | 13.21545136802141 | 16.69872866708701 | 8.98384359754840  |
| H  | 13.82244180665932 | 12.52477808425925 | 15.94512003093517 |
| H  | 12.64450763744837 | 10.88852931823096 | 16.96068893866650 |
| H  | 13.96592351666284 | 9.20553351414751  | 15.86929940614486 |
| H  | 4.06438783577648  | 10.49812851047762 | 6.05939186197464  |
| H  | 5.25240847370635  | 12.21339096068037 | 5.07534278983780  |
| H  | 6.63517683832591  | 10.69057522805690 | 4.02642728648931  |
| H  | 12.43165308487933 | 5.25983941334640  | 6.91805519396175  |
| H  | 13.62778136101401 | 6.96766839616946  | 5.94580178889132  |
| H  | 15.11185569569373 | 7.08588008307693  | 7.70027499625194  |
| H  | 14.58618041132768 | 15.16047429109322 | 7.93049481894463  |
| H  | 13.15971335865281 | 15.12381516534198 | 6.13419034783709  |
| H  | 11.79590742909383 | 16.64357460112404 | 7.16631022599510  |
| H  | 6.80149425936759  | 16.24177396792386 | 14.01018398772532 |
| H  | 5.38871869484817  | 16.18790089508771 | 12.19857857784345 |
| H  | 4.20326195874624  | 14.47476344702152 | 13.17397852886458 |
| H  | 4.72319929889916  | 6.29203090775115  | 13.04477514532863 |
| H  | 6.03174070019374  | 4.77814283904796  | 11.91204731327000 |
| H  | 7.46901457574172  | 4.82346008139667  | 13.81832095565223 |
| Pd | 13.85864900014170 | 13.86572797666667 | 7.06967534299540  |
| Pd | 13.90096185066790 | 15.20907284154307 | 9.50969876428981  |
| Pd | 14.17926826972464 | 13.81334539725504 | 11.92998477696041 |
| Pd | 14.09313198441301 | 11.08338686545972 | 6.93460550366662  |
| Pd | 14.16194300621429 | 12.41905651685378 | 9.45311850624722  |
| Pd | 14.32906608543800 | 10.95633835559274 | 11.83957751643892 |
| Pd | 14.18232802370808 | 8.26980671238615  | 6.92370886229925  |
| Pd | 14.29898022876812 | 12.30853925840396 | 14.29842490740167 |
| Pd | 14.31399207581665 | 9.63680459479991  | 9.35966355481913  |
| Pd | 14.52238533852606 | 8.11159892478152  | 11.77817905256149 |
| Pd | 14.41046089874401 | 9.49325878018813  | 14.23611016326972 |
| Pd | 14.41795939337625 | 6.81395758807152  | 9.31332780470952  |



|    |                   |                   |                   |
|----|-------------------|-------------------|-------------------|
| Pd | 11.51325794603950 | 16.48177221811393 | 8.85269222080934  |
| Pd | 11.46219638712494 | 15.13718417532234 | 6.41042861408547  |
| Pd | 11.60509361629125 | 13.62407364648696 | 8.83702734633718  |
| Pd | 11.73350049085420 | 15.11405287099482 | 11.28542353052179 |
| Pd | 11.63904868872200 | 12.34548968204773 | 6.26302779189677  |
| Pd | 11.93148341505590 | 13.67554969043993 | 13.67459518982038 |
| Pd | 11.83935848555599 | 10.90923511467400 | 8.72746570397719  |
| Pd | 11.89755183139861 | 12.24994568621128 | 11.20591154352133 |
| Pd | 11.80232478717603 | 9.55550748405979  | 6.19643859989140  |
| Pd | 11.90606251304773 | 8.19915304691055  | 8.70664988506338  |
| Pd | 12.01386811850881 | 10.77049063526379 | 13.54209689586141 |
| Pd | 12.13333747055396 | 12.23407288372173 | 16.05028544591756 |
| Pd | 12.05717534782891 | 9.41507156401459  | 11.15847537584474 |
| Pd | 11.94383027692784 | 6.76069068285341  | 6.24117203668708  |
| Pd | 12.14844522222718 | 5.30358403955614  | 8.61598302894215  |
| Pd | 12.26686467026381 | 9.47240895662428  | 16.02154330667040 |
| Pd | 12.32073311241519 | 6.54165263039890  | 11.13254992568372 |
| Pd | 12.33946393995479 | 7.73859167244946  | 13.66697893358277 |
| Pd | 9.30465731716208  | 16.42563802254754 | 10.58745927365888 |
| Pd | 9.20519485553572  | 13.66309655494787 | 5.60467611727934  |
| Pd | 9.22504239150638  | 15.04298385228912 | 8.09522621919679  |
| Pd | 9.46945797739045  | 13.56011550030924 | 10.53207123607863 |
| Pd | 9.39421822155765  | 10.83033362073059 | 5.54694054967746  |
| Pd | 9.53544225788383  | 14.97144044025236 | 13.02162610187300 |
| Pd | 9.41547903811430  | 12.18798678746359 | 8.05916396414874  |
| Pd | 9.71194183231788  | 13.52878631653676 | 15.45987263743690 |
| Pd | 9.64334574564759  | 10.72656527240356 | 10.48662928290703 |
| Pd | 9.52907906341160  | 7.98735342275099  | 5.49265393496145  |
| Pd | 9.67322123004267  | 12.10356782917036 | 12.95003787514506 |
| Pd | 9.56605068126660  | 9.37530817699635  | 7.99268966799174  |
| Pd | 9.84546417348395  | 10.70765299331800 | 15.43883759247050 |
| Pd | 9.80027871217067  | 7.91849868089731  | 10.42137559294248 |
| Pd | 9.85526370156683  | 9.26808679476934  | 12.90294174464229 |
| Pd | 9.72048476304900  | 6.53351387684821  | 7.94933935288445  |
| Pd | 10.03522358549447 | 7.89076077460770  | 15.32751484060883 |
| Pd | 9.96609004464554  | 5.01888565253307  | 10.41608539489066 |
| Pd | 10.08263392487304 | 6.40010515779656  | 12.87678017773788 |
| Pd | 7.61119336948245  | 9.16355726869229  | 14.69033825357830 |
| Pd | 7.52046313199658  | 6.35204197849972  | 9.66963264191851  |
| Pd | 7.79666860672603  | 4.93303667656986  | 12.11807934783558 |
| Pd | 7.83205821000915  | 6.36822240472683  | 14.49128183723062 |
| Pd | 7.64743433815965  | 7.87937824813213  | 12.11427491485863 |
| Pd | 7.37060857588318  | 9.21514974329595  | 9.75399183891576  |
| Pd | 7.44846915683607  | 11.95536710128009 | 14.73678152608117 |
| Pd | 7.41188064874539  | 10.59868284531620 | 12.22543994576971 |
| Pd | 7.30853509797355  | 7.77499794762504  | 7.27098380758678  |
| Pd | 7.20208690955848  | 12.03292925893203 | 9.80700344763895  |
| Pd | 7.11897206457700  | 9.30648512949870  | 4.92825881859673  |
| Pd | 7.30155158266498  | 14.75488256375257 | 14.70651140032204 |
| Pd | 7.22572243829870  | 10.67481620461867 | 7.44259369006522  |
| Pd | 7.32712058629657  | 13.32831261847796 | 12.21695236961672 |
| Pd | 7.03199754523872  | 14.89050887333059 | 9.82244936961776  |
| Pd | 6.96226553106841  | 12.09053245261473 | 4.96917596922968  |
| Pd | 6.98029472371656  | 13.53464823635040 | 7.37327618372955  |
| Pd | 7.10347097553795  | 16.17354752986496 | 12.31625248249765 |
| Pd | 5.37793585293884  | 6.26419980225585  | 11.45697129451976 |
| Pd | 5.41032337498805  | 7.63083894952546  | 13.88916254806414 |

|    |                  |                   |                   |
|----|------------------|-------------------|-------------------|
| Pd | 5.11105887921852 | 9.06429122734011  | 11.50586759587116 |
| Pd | 5.16055145929065 | 10.42972142033675 | 14.00557797155720 |
| Pd | 5.07411733288510 | 7.66205488428907  | 9.02788316223844  |
| Pd | 4.94645977912072 | 11.85987547214435 | 11.55416936791825 |
| Pd | 4.93740115036973 | 9.14146702635797  | 6.65136781460414  |
| Pd | 4.88696615710866 | 10.49650056223806 | 9.10839460173382  |
| Pd | 5.06931999205622 | 13.23706689064174 | 13.99143436235567 |
| Pd | 4.87606180789164 | 14.66034686443859 | 11.60148863713808 |
| Pd | 4.77711150092748 | 11.92540994622417 | 6.70024446571756  |
| Pd | 4.74704571973426 | 13.33890131189012 | 9.12774812007985  |

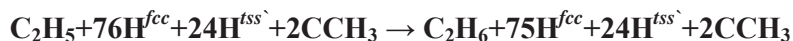

|   |                   |                   |                   |
|---|-------------------|-------------------|-------------------|
| C | 13.37926982151052 | 5.73307500842026  | 14.63717453463459 |
| C | 12.56473117701266 | 4.95817878846286  | 15.64668501833133 |
| C | 9.63651085219304  | 4.40068240179951  | 12.25763663425529 |
| C | 15.29433684451748 | 5.04405769966713  | 11.59644538216434 |
| C | 10.12580972863447 | 3.11483414663127  | 12.82187043759522 |
| C | 14.40670581183591 | 6.14092517417282  | 11.12122375154161 |
| H | 14.75720988188228 | 4.32929360435556  | 12.23951865681216 |
| H | 16.14725443827945 | 5.44627308835326  | 12.16644933452844 |
| H | 15.69518666117919 | 4.47757194250126  | 10.74122277544022 |
| H | 9.84874676105775  | 3.01504255125829  | 13.88213201682890 |
| H | 11.21943569137669 | 3.03332715055158  | 12.73008408975116 |
| H | 9.68265937784991  | 2.26483068161481  | 12.27690938728265 |
| H | 14.10453122405025 | 6.42359546485811  | 15.08676571715164 |
| H | 13.91876274952046 | 5.07802979382878  | 13.94827647419458 |
| H | 12.06961293343123 | 5.61293232284058  | 16.37335553626351 |
| H | 13.23277886079654 | 4.27961165695946  | 16.20522578146972 |
| H | 11.79173104153874 | 4.33960127698794  | 15.17370027478459 |
| H | 8.66521661632784  | 12.45571876196790 | 4.40189200877398  |
| H | 8.80912760455995  | 9.40692118668447  | 4.33040866644990  |
| H | 3.87530512881996  | 10.51052787221929 | 10.71913694701974 |
| H | 4.15551815817716  | 7.59643332628248  | 10.59886458749507 |
| H | 3.96833737219243  | 9.01742915928668  | 8.16043716618289  |
| H | 3.79417505036445  | 12.05559276666380 | 8.23740918009602  |
| H | 3.83452376365560  | 13.46112371853979 | 10.74262497127878 |
| H | 4.07479044115099  | 11.86253345184189 | 13.28948715038416 |
| H | 4.20723451028730  | 9.07437000284266  | 13.21216039548458 |
| H | 7.32863089746860  | 13.92099089905000 | 5.42389126363302  |
| H | 7.46238660561934  | 16.73816896081627 | 10.55861565940040 |
| H | 7.31902749771374  | 15.37890154994451 | 7.96412577945289  |
| H | 5.00330996200566  | 15.10117228680403 | 9.73677663939950  |
| H | 4.96222671744582  | 13.72287795329662 | 7.29099396963583  |
| H | 7.91553409436086  | 13.52143125654468 | 15.82958361215635 |
| H | 7.95849104529265  | 10.57328171815812 | 15.85143689358775 |
| H | 8.24418059731033  | 7.61459505046375  | 15.65126375206763 |
| H | 5.45081325794647  | 11.94835827694827 | 15.05428259164066 |
| H | 5.61967232291450  | 9.07626839389925  | 14.97860008222366 |
| H | 8.06529907540780  | 4.62663614263204  | 10.22822476791219 |
| H | 7.62397641473369  | 7.70678943084805  | 5.26576782273635  |
| H | 7.78676571991859  | 6.05153831547083  | 7.73964417659510  |
| H | 5.30076705918167  | 7.53551268296710  | 7.14092002936202  |
| H | 5.46338353835382  | 6.05433444101200  | 9.57073491862148  |
| H | 8.81195157719216  | 16.76153914054587 | 12.38377151860424 |
| H | 9.09972451225280  | 15.16711127695488 | 14.90814335947160 |
| H | 15.28853745911172 | 11.05762393015160 | 10.12750536301781 |

|   |                   |                   |                   |
|---|-------------------|-------------------|-------------------|
| H | 15.37887306992062 | 8.22297878370362  | 9.98960115470474  |
| H | 15.05987231222541 | 9.75412956716948  | 7.49575762785209  |
| H | 14.89493029518302 | 12.56301757803156 | 7.58380957526528  |
| H | 15.02363500488958 | 13.97999304095920 | 10.24503814425870 |
| H | 15.20628641966985 | 12.55321376524959 | 12.68319079493810 |
| H | 15.31321091703326 | 9.48977924178553  | 12.60823458112077 |
| H | 11.84342430869254 | 7.77124125965410  | 15.48116146065796 |
| H | 11.71739146413848 | 4.80609934695812  | 10.31129174540080 |
| H | 10.06136011577872 | 6.41364427542858  | 5.91789929561583  |
| H | 10.35894580262642 | 4.82399451982938  | 8.47477816530502  |
| H | 13.50717791475527 | 12.56342188964094 | 5.81821745217659  |
| H | 13.61364946807059 | 9.71469021058520  | 5.74369026187000  |
| H | 10.94656770253702 | 13.96154538284779 | 5.11884789447097  |
| H | 11.25694670815182 | 8.02960585665183  | 5.00750089888187  |
| H | 11.18015169368009 | 11.03377882930424 | 4.95078159179471  |
| H | 9.70563959512419  | 16.89320108133144 | 8.84294453255628  |
| H | 9.62913758157256  | 15.46134503020255 | 6.18659241539281  |
| H | 11.51658606008084 | 13.90796990920681 | 15.54545471199698 |
| H | 11.41210126102907 | 15.49479964235819 | 13.14111961710111 |
| H | 11.07223721495052 | 16.91778420865836 | 10.58171030619273 |
| H | 13.68809559059223 | 15.50530471404264 | 11.28729636326002 |
| H | 13.87480620471556 | 14.07868743757966 | 13.67996016682565 |
| H | 10.35228006134328 | 12.17376056520117 | 16.52773061515231 |
| H | 10.49240039606100 | 9.20970311269883  | 16.46709839972571 |
| H | 12.43536249405429 | 5.95694990949549  | 13.15275187371429 |
| H | 11.72443573267306 | 9.07536292190955  | 12.95669015687806 |
| H | 9.28279652010463  | 7.70336244986432  | 12.10137480205816 |
| H | 7.87557836891080  | 7.60882677865212  | 10.30588245906383 |
| H | 7.68043161568471  | 9.12734844287456  | 7.86405517350486  |
| H | 10.13516090277808 | 7.77563488612759  | 8.54675017730657  |
| H | 6.32303120094372  | 10.67144232963890 | 8.92910193235878  |
| H | 6.55655115215998  | 9.18698347936107  | 11.37866156696767 |
| H | 6.39164143550277  | 12.04162302731698 | 11.44573374781981 |
| H | 10.31283128484100 | 10.74400737339850 | 13.92197714544515 |
| H | 7.82317833077135  | 12.08214480334755 | 13.25215084236332 |
| H | 8.04372381330918  | 9.25746752473427  | 13.18139488062603 |
| H | 12.63559062528248 | 12.41273176171113 | 9.47890093561126  |
| H | 12.83885832068382 | 10.88614164489980 | 11.89897470064139 |
| H | 12.73938986335190 | 9.53520160232055  | 9.45788791292128  |
| H | 8.88971109221527  | 10.84633873138162 | 6.91007925316390  |
| H | 11.21491947335552 | 12.37762181230000 | 7.67662392000848  |
| H | 11.34289050349652 | 9.52232399867546  | 7.59497905929560  |
| H | 7.58756587866087  | 13.76709196717104 | 10.46239236240039 |
| H | 9.85091328611431  | 13.91475838346425 | 8.71257231031191  |
| H | 7.53492007876818  | 12.38269656094643 | 7.96266137134797  |
| H | 11.27342441568715 | 13.93701101868399 | 10.54559149107350 |
| H | 9.01729316955785  | 13.79059652810207 | 12.29234248327074 |
| H | 11.48456751505275 | 12.41924823249708 | 12.95961504535861 |
| H | 5.58867294043545  | 14.60710212318110 | 14.96558330980765 |
| H | 5.33451764472544  | 9.07492237325397  | 4.89541552084806  |
| H | 6.04002619641804  | 6.48876431067347  | 14.82005981327937 |
| H | 13.83194389384165 | 5.30979263059407  | 8.50406011897546  |
| H | 15.15313055935381 | 10.91579439717201 | 14.76239252441550 |
| H | 13.24842634717502 | 16.76047071933456 | 8.94152611824088  |
| H | 13.82134175098092 | 12.46669409229740 | 15.93206219172897 |
| H | 12.63985820791436 | 10.84347929997097 | 16.92576805429965 |
| H | 13.96814392099031 | 9.22558033295929  | 15.83634701635186 |

|    |                   |                   |                   |
|----|-------------------|-------------------|-------------------|
| H  | 3.96076729737299  | 10.59276516822232 | 5.97878421325868  |
| H  | 5.16961278656976  | 12.30525856879488 | 4.97991015792072  |
| H  | 6.55959549432572  | 10.79672287031076 | 3.93370007611417  |
| H  | 12.34358606985487 | 5.23411955524290  | 6.86075514316272  |
| H  | 13.56465281411016 | 6.96943660550048  | 5.89161464974704  |
| H  | 15.06329495827457 | 7.07650558013341  | 7.57478578188790  |
| H  | 14.58154890126701 | 15.24663674501110 | 7.87222845316167  |
| H  | 13.14794910024014 | 15.22661036678724 | 6.04979174967656  |
| H  | 11.82073162671186 | 16.73812826361895 | 7.12047512565353  |
| H  | 6.76574686897853  | 16.32388669488456 | 14.00034282461555 |
| H  | 5.33162478662828  | 16.31419314320016 | 12.16334886657444 |
| H  | 4.15803664760435  | 14.62047772635128 | 13.14718070266419 |
| H  | 4.64516491805579  | 6.30010231331234  | 12.99780755624617 |
| H  | 5.92954488087840  | 4.79398305649194  | 11.80411346095311 |
| H  | 7.28799658219606  | 4.84074884969305  | 13.72462618423345 |
| H  | 11.52243137039426 | 7.84952368820391  | 10.33261178993970 |
| Pd | 13.88114485452285 | 13.95426017242884 | 6.96535533309850  |
| Pd | 13.97931879242932 | 15.30014171630982 | 9.47559423558495  |
| Pd | 14.26647822439599 | 13.90174387952837 | 11.92351066805043 |
| Pd | 14.08326144070610 | 11.13568337838613 | 6.79344136105141  |
| Pd | 14.45863507682477 | 12.48995215548796 | 9.36589087119086  |
| Pd | 14.65941945237304 | 10.99396972467790 | 11.81128142044280 |
| Pd | 14.17160708038232 | 8.29499220233813  | 6.79576303579243  |
| Pd | 14.36180246299583 | 12.36875785908134 | 14.29686809766713 |
| Pd | 14.59545343108605 | 9.66038343921343  | 9.25053358061743  |
| Pd | 14.58563162305353 | 8.04907194254295  | 11.67470741816991 |
| Pd | 14.45052714368983 | 9.46009910754189  | 14.20554981372256 |
| Pd | 14.45168476866686 | 6.77513203540889  | 9.21758707067547  |
| Pd | 11.52585176806717 | 16.64005116381183 | 8.81866940487876  |
| Pd | 11.44474896342023 | 15.27228606711551 | 6.29799137685956  |
| Pd | 11.71129440893634 | 13.84610052557055 | 8.71477598921524  |
| Pd | 11.86002318977954 | 15.45507182753857 | 11.38194127716943 |
| Pd | 11.68251369702164 | 12.46631030521839 | 5.89579387477609  |
| Pd | 12.05106585519909 | 13.96370093387684 | 13.80348274523379 |
| Pd | 11.86822786328211 | 10.94935761681649 | 8.63515909533929  |
| Pd | 11.91521135305766 | 12.32376385837680 | 11.17529139124060 |
| Pd | 11.81295651414077 | 9.58445611227301  | 5.82070577124266  |
| Pd | 11.98674157129415 | 8.06367329758397  | 8.55657307234919  |
| Pd | 12.13298049210731 | 10.81957636918686 | 13.63433137023607 |
| Pd | 12.12887187006764 | 12.24101340996259 | 16.07962180548423 |
| Pd | 12.08064966994817 | 9.37157031774244  | 11.15041139412341 |
| Pd | 11.87067795362175 | 6.73159431255557  | 6.10889509624302  |
| Pd | 12.10422262667302 | 5.23615227714160  | 8.56093326540915  |
| Pd | 12.25342449097925 | 9.40889981137942  | 16.02616102304930 |
| Pd | 12.41449343531530 | 6.23943405162314  | 11.24858368447499 |
| Pd | 12.40270789999686 | 7.53177123160105  | 13.73761457409236 |
| Pd | 9.28627222572200  | 16.59961786698180 | 10.57988480775302 |
| Pd | 9.14638616492076  | 13.83601295709940 | 5.47629892233822  |
| Pd | 9.10957717528093  | 15.40188759467627 | 7.93827525825700  |
| Pd | 9.44240941743256  | 13.70744654593843 | 10.50597333100379 |
| Pd | 9.38577712602237  | 10.93551544811954 | 5.15382127946290  |
| Pd | 9.60885981465711  | 15.29683206700376 | 13.15273609362017 |
| Pd | 9.37440256676573  | 12.32008704390851 | 7.93497192218905  |
| Pd | 9.71022815672296  | 13.58374971487237 | 15.50617853626981 |
| Pd | 9.56999418083683  | 10.80218064863414 | 10.41172270777446 |
| Pd | 9.44899761816256  | 8.00107887145226  | 5.32409806613629  |
| Pd | 9.64511538506500  | 12.19277573894379 | 12.99917030266278 |

|    |                   |                   |                   |
|----|-------------------|-------------------|-------------------|
| Pd | 9.51149534365680  | 9.40085423802240  | 7.85875819298332  |
| Pd | 9.74526455367139  | 10.68115230736746 | 15.67735443371360 |
| Pd | 9.70537578567648  | 7.90893533547055  | 10.32507858600424 |
| Pd | 9.82764206717000  | 9.23958048575945  | 12.92365768657392 |
| Pd | 9.56917172529379  | 6.27327435343307  | 7.70375398905728  |
| Pd | 10.00306300628588 | 7.81795000953258  | 15.37425891640856 |
| Pd | 9.87840736862530  | 4.92972538973212  | 10.33680831913970 |
| Pd | 10.07858208074854 | 6.20702037904885  | 12.94665726502198 |
| Pd | 7.46086410555033  | 9.12339051420498  | 14.91310477457895 |
| Pd | 7.29811908640927  | 6.09650335544771  | 9.45508348747673  |
| Pd | 7.70078345458563  | 4.90984472520331  | 12.04264337047920 |
| Pd | 7.72418456950728  | 6.33149463808104  | 14.48330979118030 |
| Pd | 7.44485730757831  | 7.76711936691099  | 12.13791805582630 |
| Pd | 7.19997860947404  | 9.21187612269895  | 9.64174253984583  |
| Pd | 7.29499150187417  | 12.00491979920042 | 14.99722332567288 |
| Pd | 7.32337247370044  | 10.64646171932828 | 12.20538830722484 |
| Pd | 7.12587421142296  | 7.59038089516919  | 7.02253850442943  |
| Pd | 7.09288744645801  | 12.14511126380009 | 9.72963615427530  |
| Pd | 7.02659341893902  | 9.36589447823767  | 4.77513136505718  |
| Pd | 7.27924188091492  | 14.84780148512870 | 14.73386924275040 |
| Pd | 7.04141495468564  | 10.75368219345153 | 7.19666633787535  |
| Pd | 7.16121536673828  | 13.53509200696680 | 12.26905388527000 |
| Pd | 6.84287085027845  | 15.24677091798010 | 9.68739979233337  |
| Pd | 6.88149483707269  | 12.23384750694381 | 4.82237225308078  |
| Pd | 6.78569961656047  | 13.86001044024239 | 7.17387992773428  |
| Pd | 7.06004208153769  | 16.33327785440577 | 12.30591633013296 |
| Pd | 5.19727218560553  | 6.26720307139361  | 11.36815039475193 |
| Pd | 5.24269951876937  | 7.66647786276139  | 13.86257642120281 |
| Pd | 4.70714302293144  | 9.09562558185857  | 11.46164635291290 |
| Pd | 5.02181959465432  | 10.49504967291437 | 13.99099519806284 |
| Pd | 4.89931520420051  | 7.66612674439291  | 8.91982915652298  |
| Pd | 4.55840615642395  | 11.95795545996647 | 11.52388086809044 |
| Pd | 4.81125592322588  | 9.19877481899582  | 6.53034911358357  |
| Pd | 4.49045929637384  | 10.55723455728700 | 9.02083584120925  |
| Pd | 4.96798947771556  | 13.33699459561525 | 13.98783131486816 |
| Pd | 4.75116688287688  | 14.81489829314908 | 11.55436103539203 |
| Pd | 4.64162538455349  | 12.04911964658138 | 6.59885674184147  |
| Pd | 4.59576036016211  | 13.47473239236920 | 9.05841769598667  |

Transition states on edges of Pd<sub>79</sub> nanoparticles

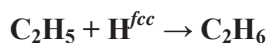

|    |                   |                   |                   |
|----|-------------------|-------------------|-------------------|
| C  | 15.99492017479842 | 6.83866123475102  | 12.16474164956364 |
| C  | 17.28521839714555 | 6.90970519861579  | 11.37039505316357 |
| H  | 16.05168736878472 | 7.41791196035447  | 13.10241803562698 |
| H  | 15.67455065772268 | 5.817711030291295 | 12.39812580868424 |
| H  | 18.11619655560022 | 6.53838703316481  | 11.99285089262929 |
| H  | 17.52784917920238 | 7.93719598771016  | 11.07362718833773 |
| H  | 17.24569288030786 | 6.29532601364872  | 10.46149165611156 |
| H  | 15.00891972376914 | 6.88973928301974  | 10.91506859013367 |
| Pd | 13.65138677380926 | 13.67941359959145 | 7.12085964416520  |
| Pd | 13.69742038997657 | 15.02462566257934 | 9.48361039293454  |

|    |                   |                   |                   |
|----|-------------------|-------------------|-------------------|
| Pd | 13.88864589673565 | 13.70656728197564 | 11.81831373873829 |
| Pd | 13.78621996184182 | 10.99516330085842 | 7.02909238787734  |
| Pd | 14.00177861431186 | 12.32150076703954 | 9.43931906531096  |
| Pd | 14.15466177959395 | 10.94788168626959 | 11.76002198841998 |
| Pd | 13.81397748919906 | 8.29986959251402  | 7.03104182755843  |
| Pd | 13.97921649908571 | 12.30112341818680 | 14.11460925154786 |
| Pd | 14.10100356842514 | 9.61474778267563  | 9.38928380574642  |
| Pd | 14.28635016137555 | 8.14777840190865  | 11.77966170167918 |
| Pd | 14.13104971872474 | 9.59208359913706  | 14.09535926685011 |
| Pd | 14.04976826430694 | 6.89170550085752  | 9.35355524729168  |
| Pd | 11.39498745604113 | 16.31284502838110 | 8.81813215264721  |
| Pd | 11.34957435308535 | 14.97381234121739 | 6.45540561979548  |
| Pd | 11.51106358960372 | 13.58962137985242 | 8.78729163654881  |
| Pd | 11.61099479054887 | 15.09855118355703 | 11.22587117255522 |
| Pd | 11.50084443882667 | 12.28199190433027 | 6.23232507444995  |
| Pd | 11.74755061473067 | 13.74677174212289 | 13.55418398686714 |
| Pd | 11.67537929196813 | 10.88734497519623 | 8.69838273796658  |
| Pd | 11.73358999900869 | 12.25620331567713 | 11.13130231918894 |
| Pd | 11.58052536084667 | 9.58882749983528  | 6.16679846337663  |
| Pd | 11.69270433893237 | 8.21301181707496  | 8.66769601665755  |
| Pd | 11.80590276442063 | 10.88181234513882 | 13.42502640073313 |
| Pd | 11.83403460219730 | 12.23409769016086 | 15.79955690928869 |
| Pd | 11.92537578424848 | 9.45306954788314  | 11.09909610240356 |
| Pd | 11.61681479455528 | 6.88432602592881  | 6.27225659810211  |
| Pd | 11.80413725187449 | 5.53617258317111  | 8.62606896910702  |
| Pd | 11.96420290207744 | 9.50930387124703  | 15.72763037448729 |
| Pd | 11.97158714513170 | 6.68534914844408  | 11.08628993385301 |
| Pd | 12.03008504429927 | 8.01155753177409  | 13.45855698725402 |
| Pd | 9.25870265988861  | 16.30246377030974 | 10.46003257740841 |
| Pd | 9.15937348187953  | 13.61363813811962 | 5.67771490923326  |
| Pd | 9.14048335314630  | 15.03546220599049 | 8.02473726863218  |
| Pd | 9.36956814777239  | 13.59951122253094 | 10.43904953128390 |
| Pd | 9.30703912118456  | 10.88375060705773 | 5.50276244281903  |
| Pd | 9.47086247286967  | 15.02739766021414 | 12.87896386378302 |
| Pd | 9.31381116802820  | 12.22945864007341 | 7.99605456739283  |
| Pd | 9.54597951675051  | 13.53045225469383 | 15.17922529085276 |
| Pd | 9.47741060997996  | 10.81653325844039 | 10.39087338155197 |
| Pd | 9.32778884313217  | 8.14078958659679  | 5.57146954892469  |
| Pd | 9.51361944632552  | 12.19585235634146 | 12.82822340777131 |
| Pd | 9.39048630802544  | 9.45905625311199  | 7.93567035014307  |
| Pd | 9.60849159961392  | 10.78606747518025 | 15.26292091668019 |
| Pd | 9.61316180010708  | 8.04363758091662  | 10.34159913064418 |
| Pd | 9.66912294523505  | 9.40545026158019  | 12.77612666727515 |
| Pd | 9.44333645754453  | 6.64312850121216  | 7.86705636169291  |
| Pd | 9.79570150013726  | 8.04157453942493  | 15.09002559619399 |
| Pd | 9.69663776614501  | 5.35078415653686  | 10.29052683329043 |
| Pd | 9.84575340356649  | 6.58067684687828  | 12.75540951512292 |
| Pd | 7.44703206948522  | 9.33945130300273  | 14.55026137643095 |
| Pd | 7.33961268074710  | 6.53972427474539  | 9.54932712711464  |
| Pd | 7.58879194211688  | 5.30783223595931  | 11.95698445019851 |
| Pd | 7.62822539922684  | 6.63603396915854  | 14.33050420160246 |
| Pd | 7.47741926235671  | 8.01745751008537  | 12.00379090374219 |
| Pd | 7.22344888936176  | 9.34591814579650  | 9.65923181432430  |
| Pd | 7.31112700051841  | 12.03951069364866 | 14.60100873522684 |
| Pd | 7.28031639858729  | 10.71442950909644 | 12.10245435011404 |
| Pd | 7.14593075615063  | 7.90335121412650  | 7.22443071281898  |
| Pd | 7.10792204304518  | 12.13191063743916 | 9.70072392720623  |



|    |                  |                   |                   |
|----|------------------|-------------------|-------------------|
| Pd | 7.05267957598791 | 9.45653753318983  | 5.00297084319296  |
| Pd | 7.26282132119895 | 14.75013827672003 | 14.43845315541343 |
| Pd | 7.11279130146916 | 10.77697391318609 | 7.35989266349339  |
| Pd | 7.22632991541304 | 13.41960890147777 | 12.08274640919961 |
| Pd | 6.99799554856507 | 14.95412560590200 | 9.66440459426196  |
| Pd | 6.96991079063837 | 12.17766707781091 | 5.03395902175921  |
| Pd | 6.94358819423301 | 13.63789661932525 | 7.30955292777124  |
| Pd | 7.12403920666499 | 16.13589762769702 | 12.10025473933359 |
| Pd | 5.27530628342960 | 6.58680761092989  | 11.29649496269221 |
| Pd | 5.32036721218123 | 7.91580145859995  | 13.66431919222600 |
| Pd | 4.97514130960547 | 9.27941894643080  | 11.34578989629921 |
| Pd | 5.13671903472729 | 10.60236669901277 | 13.74901154309878 |
| Pd | 5.03191625479414 | 7.91595441909620  | 8.96572739531524  |
| Pd | 4.84168120839185 | 11.97576784518060 | 11.38260022844170 |
| Pd | 4.90978337884395 | 9.33431797166876  | 6.67552671188840  |
| Pd | 4.78594564852136 | 10.65622542487228 | 9.02947602517450  |
| Pd | 5.07147106322294 | 13.29870307862144 | 13.73542540914030 |
| Pd | 4.93172279264909 | 14.68614183362867 | 11.39909158220497 |
| Pd | 4.82335243619464 | 12.05252847083512 | 6.69967893587233  |
| Pd | 4.82299092601235 | 13.39938790538243 | 9.03299251218642  |

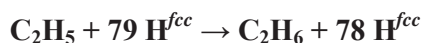

|   |                   |                   |                   |
|---|-------------------|-------------------|-------------------|
| C | 15.82848418888560 | 6.44634727582471  | 12.06983207117943 |
| C | 16.94895147253790 | 6.29871291679034  | 11.06495370956867 |
| H | 16.12588734247110 | 6.97916995609503  | 12.98166363185526 |
| H | 15.36550422796113 | 5.49636366575773  | 12.35618128737730 |
| H | 17.76474866638229 | 5.71194020962985  | 11.52249801769143 |
| H | 17.36869180070301 | 7.26495382460825  | 10.76209587652501 |
| H | 16.62815125143116 | 5.76281832066578  | 10.15907604988969 |
| H | 9.51919487878434  | 4.90416120574338  | 12.07185236151088 |
| H | 9.53097087015987  | 6.26377844387530  | 14.53200872244845 |
| H | 8.75635957551132  | 12.30458527525148 | 4.48179209229199  |
| H | 8.91133970700752  | 9.49290496999663  | 4.42956306152907  |
| H | 4.08455015479765  | 10.49531548994547 | 10.64257983473825 |
| H | 4.25688432469640  | 7.69881135131170  | 10.57712951717759 |
| H | 4.06250389147366  | 9.13463830618676  | 8.17846047625429  |
| H | 3.91017552841386  | 11.94879411700893 | 8.23986908087971  |
| H | 3.93691987492497  | 13.29690198698147 | 10.68314898921073 |
| H | 4.10877989082032  | 11.84227035416677 | 13.10513359576829 |
| H | 4.27266274088296  | 9.05623056583535  | 13.04166577519331 |
| H | 7.34212484000589  | 13.86666254380692 | 5.52164993085999  |
| H | 7.41352631658817  | 16.59172702613716 | 10.43928361110165 |
| H | 7.36546919875422  | 15.22600801861408 | 7.99097315133593  |
| H | 5.17034959614031  | 15.04270359999972 | 9.71202407472244  |
| H | 5.13642588839938  | 13.68654559310474 | 7.24875157549417  |
| H | 7.81040110544847  | 13.42170415876073 | 15.68825424276995 |
| H | 7.95685234095206  | 10.63369505880181 | 15.63282530676166 |
| H | 8.13190441632681  | 7.82473100583319  | 15.58644499988464 |
| H | 5.56229792156792  | 11.88254745691501 | 14.95009747649797 |
| H | 5.70778994306655  | 9.09457840626442  | 14.90180791464518 |
| H | 8.09018298878421  | 4.85549945262491  | 10.21515776469105 |
| H | 7.69356613926246  | 7.74008221015438  | 5.41151338318254  |
| H | 7.88468133478620  | 6.29873541982679  | 7.81206154563111  |
| H | 5.47923442766011  | 7.57116561496701  | 7.14079215353212  |
| H | 5.66641589182812  | 6.13780110268672  | 9.52601833830427  |

|    |                   |                   |                   |
|----|-------------------|-------------------|-------------------|
| H  | 5.51515972616280  | 14.59555255706066 | 14.86571774767558 |
| H  | 5.41774777404662  | 9.05701181186961  | 4.90059422149813  |
| H  | 5.99061796510315  | 6.43715279593293  | 14.71674085430656 |
| H  | 8.83948207126635  | 16.63148083763107 | 12.30119784592118 |
| H  | 9.02212821882423  | 15.17346556115460 | 14.70727442599587 |
| H  | 15.00595821877213 | 11.06545990320144 | 10.15910656755061 |
| H  | 14.98383497303872 | 9.77849598227406  | 7.75569403816057  |
| H  | 14.83833442965433 | 12.59934396348944 | 7.75906577351861  |
| H  | 14.86172443509028 | 13.92432496229602 | 10.23387479898012 |
| H  | 15.02912084474543 | 12.50173913509344 | 12.61419099147362 |
| H  | 15.20536369997290 | 9.76341837391518  | 12.61350454451684 |
| H  | 14.48037349564289 | 6.60378334610782  | 11.17310385808583 |
| H  | 13.92542788280692 | 7.99359348349163  | 13.57708627093291 |
| H  | 11.77149370193898 | 7.78197265558713  | 15.28231630542377 |
| H  | 11.72505025811442 | 5.08671407178305  | 10.38114205168853 |
| H  | 11.75623385063019 | 6.44341384649148  | 12.78024630090330 |
| H  | 10.09513522435630 | 6.46036009034294  | 6.09321522349638  |
| H  | 10.26187905688050 | 5.01323125509643  | 8.51389585411729  |
| H  | 13.39648711203398 | 12.51338857708479 | 5.91339923776422  |
| H  | 13.55046402667536 | 9.77888684670180  | 5.84388402188714  |
| H  | 10.99022367371680 | 13.82551437746654 | 5.22115615060162  |
| H  | 11.30319572599489 | 8.20772694205674  | 5.11144944089899  |
| H  | 11.14004669410881 | 11.02030939430614 | 5.16535635827108  |
| H  | 9.61516801989239  | 16.74572847394763 | 8.73235014342938  |
| H  | 9.57350950748970  | 15.38598694930069 | 6.26933344814069  |
| H  | 11.41762976401766 | 13.89962426239869 | 15.38674895872076 |
| H  | 11.22510237368028 | 15.34159060493838 | 12.98931121328630 |
| H  | 11.05406303165472 | 16.78281725930629 | 10.59304921810664 |
| H  | 13.44608693138039 | 15.50630756994290 | 11.26099507645018 |
| H  | 13.62982930930820 | 14.07071573123723 | 13.66680207951814 |
| H  | 10.20484123908282 | 12.14757661172524 | 16.37436874038461 |
| H  | 10.34372382039698 | 9.34290452763476  | 16.32955368085023 |
| H  | 13.79527928900870 | 5.39518002472741  | 8.74904214693524  |
| H  | 15.07981272074003 | 11.06606779275691 | 14.87348429470402 |
| H  | 13.15969739321935 | 16.76206191126458 | 8.94122828298508  |
| H  | 13.70022163163428 | 12.57088455528283 | 15.90225853882522 |
| H  | 12.50757913748281 | 10.86290661852172 | 16.87433213768205 |
| H  | 13.86481434103519 | 9.31962871153033  | 15.85243671819336 |
| H  | 4.03926323302148  | 10.58343025280565 | 5.92665876855473  |
| H  | 5.23399321439268  | 12.30377663372970 | 4.96183809915428  |
| H  | 6.60243464808734  | 10.77954809840977 | 3.93606349254689  |
| H  | 12.42147518302417 | 5.33736955388868  | 6.89676996941853  |
| H  | 13.59484298011525 | 7.07229652941579  | 5.90485095013118  |
| H  | 14.95982707793636 | 7.09517087063455  | 7.70161094006532  |
| H  | 14.52762568156786 | 15.23547023084937 | 7.89914499689490  |
| H  | 13.11228155179479 | 15.19250391959222 | 6.07536441186302  |
| H  | 11.75126117218882 | 16.72713968291175 | 7.11275174836579  |
| H  | 6.69819990355080  | 16.29577466777450 | 13.91165263477724 |
| H  | 5.30952526277863  | 16.25112299427944 | 12.11448340194949 |
| H  | 4.11577519978253  | 14.54228147128112 | 13.07262283346429 |
| H  | 4.58871994929048  | 6.38889424327372  | 12.89772958198514 |
| H  | 5.96737684052488  | 4.87333057424708  | 11.88581686234892 |
| H  | 7.37163617974087  | 4.91424043000204  | 13.69595106902835 |
| Pd | 13.80618334246090 | 13.94138273474073 | 7.03081065500321  |
| Pd | 13.83755088096478 | 15.27783882941564 | 9.47102710375784  |
| Pd | 14.10094124760289 | 13.90232467995764 | 11.90039478485196 |
| Pd | 14.04407127339485 | 11.14609198540791 | 6.92949482760377  |

|    |                   |                   |                   |
|----|-------------------|-------------------|-------------------|
| Pd | 14.12145104712222 | 12.49404498487599 | 9.41920695186770  |
| Pd | 14.26472570708966 | 11.04304939903274 | 11.81399743914536 |
| Pd | 14.12904366982239 | 8.35744384929747  | 6.90430534003248  |
| Pd | 14.21312121055023 | 12.41640358615838 | 14.27041560910409 |
| Pd | 14.19994095184487 | 9.69639546484898  | 9.37476407449198  |
| Pd | 14.45504091842013 | 8.19020199783131  | 11.75995224713754 |
| Pd | 14.35004456018103 | 9.63758564524551  | 14.22481185954236 |
| Pd | 14.30376348662433 | 6.95168427914865  | 9.27732607790741  |
| Pd | 11.45523957630576 | 16.56638031698052 | 8.79714342914626  |
| Pd | 11.42004167261611 | 15.22117002040497 | 6.35230507002885  |
| Pd | 11.54513931129373 | 13.69711642546656 | 8.77802820023905  |
| Pd | 11.65992903631215 | 15.20908014745618 | 11.24218510447637 |
| Pd | 11.60314946902134 | 12.42499826745605 | 6.19599234961761  |
| Pd | 11.84335379116354 | 13.76877210785797 | 13.63157022808690 |
| Pd | 11.77661353385152 | 10.98225800425953 | 8.67144218461225  |
| Pd | 11.81581714683788 | 12.35325654462369 | 11.13558191523189 |
| Pd | 11.76331952964911 | 9.63056500644001  | 6.13638184504096  |
| Pd | 11.87979722722635 | 8.25082723908069  | 8.66544255265161  |
| Pd | 11.89875321221815 | 10.90503307878711 | 13.45415331947983 |
| Pd | 12.01187608742526 | 12.24564680820842 | 15.98112833512903 |
| Pd | 11.97883370375882 | 9.51938371853832  | 11.10173638206838 |
| Pd | 11.91289114481510 | 6.82606649664509  | 6.18873746828788  |
| Pd | 12.09223410012256 | 5.39424657913666  | 8.57938191570140  |
| Pd | 12.15973010739203 | 9.46256234796575  | 15.94408891369545 |
| Pd | 12.16911467179662 | 6.69384192908162  | 11.05964358789986 |
| Pd | 12.15671115426360 | 8.04689954389670  | 13.53231438762755 |
| Pd | 9.23354885298099  | 16.50391702878957 | 10.51663274446750 |
| Pd | 9.17603059188127  | 13.75156264905650 | 5.52784991541059  |
| Pd | 9.17128224096109  | 15.13947797831317 | 8.01760119667747  |
| Pd | 9.38784969022608  | 13.64774098592530 | 10.45618510995514 |
| Pd | 9.36590018812705  | 10.90879209104288 | 5.46133117631107  |
| Pd | 9.44755270405692  | 15.04981360214348 | 12.95168098472206 |
| Pd | 9.36132328522297  | 12.27338823794522 | 7.98157524740637  |
| Pd | 9.60792888470661  | 13.57355891434708 | 15.37521284493401 |
| Pd | 9.53334334069886  | 10.83329609475435 | 10.39979062390592 |
| Pd | 9.50539391101693  | 8.06474951497294  | 5.43018701530927  |
| Pd | 9.57466448874285  | 12.19480614340933 | 12.87027759627446 |
| Pd | 9.52492758417833  | 9.45260773492196  | 7.92023176447669  |
| Pd | 9.73680552369481  | 10.73404532827419 | 15.34327961474039 |
| Pd | 9.72361553949662  | 8.01274132315773  | 10.34077145224811 |
| Pd | 9.73335237118287  | 9.37284888271950  | 12.81940556197107 |
| Pd | 9.66437514873410  | 6.58700362913419  | 7.84741096790563  |
| Pd | 9.92821312714676  | 7.89471226789138  | 15.28073123642011 |
| Pd | 9.89131257677507  | 5.16079399980171  | 10.29339865806443 |
| Pd | 9.94768662031453  | 6.51601914136689  | 12.78325269225570 |
| Pd | 7.49535574530420  | 9.21664465136419  | 14.61265831904521 |
| Pd | 7.45550595290595  | 6.42740630862976  | 9.56198712252044  |
| Pd | 7.66993326988278  | 5.07420111412416  | 12.01159711650761 |
| Pd | 7.68866433219350  | 6.42592313913978  | 14.44860094829431 |
| Pd | 7.55574682861466  | 7.94234253719699  | 12.02069145893784 |
| Pd | 7.29739968244626  | 9.28730465314554  | 9.65684876990912  |
| Pd | 7.34349813397491  | 12.01176964365257 | 14.64715313486600 |
| Pd | 7.31490420921599  | 10.66029854799591 | 12.13410199669869 |
| Pd | 7.26549669191661  | 7.86697713417710  | 7.16751831449951  |
| Pd | 7.11791368301459  | 12.11709263844883 | 9.70753876134755  |
| Pd | 7.10164810862431  | 9.39211962993977  | 4.82113912298057  |
| Pd | 7.20128899225376  | 14.80921298716257 | 14.61177759963551 |

|    |                  |                   |                   |
|----|------------------|-------------------|-------------------|
| Pd | 7.18783109332828 | 10.74628745645783 | 7.34617031615470  |
| Pd | 7.22548829612832 | 13.39285606986747 | 12.12611205830304 |
| Pd | 6.96752175972455 | 14.97835372487570 | 9.73242133651597  |
| Pd | 6.94382622710066 | 12.17962268678287 | 4.87022117810762  |
| Pd | 6.93771017365164 | 13.62637607544550 | 7.27335603426660  |
| Pd | 7.02141891823601 | 16.25202053383951 | 12.22528186245894 |
| Pd | 5.28369570630449 | 6.34455569418967  | 11.32859767181821 |
| Pd | 5.29449787653384 | 7.69108690971061  | 13.77164964642416 |
| Pd | 5.00794708395582 | 9.13487742160836  | 11.38717150222210 |
| Pd | 5.05906522999404 | 10.48852904552936 | 13.88548131896274 |
| Pd | 5.01309522746031 | 7.73825635582617  | 8.90915976092300  |
| Pd | 4.83595442658277 | 11.92738449996464 | 11.44501085706713 |
| Pd | 4.89927205021257 | 9.22483087943322  | 6.53007168110286  |
| Pd | 4.81172071492700 | 10.56862521566624 | 8.99017093250509  |
| Pd | 4.96674661384188 | 13.29447963841297 | 13.88734426666385 |
| Pd | 4.79390182913586 | 14.72883544723565 | 11.50152423115605 |
| Pd | 4.74497009862677 | 12.00894801792618 | 6.58446171549918  |
| Pd | 4.68619089297632 | 13.41787919423037 | 9.01638388479854  |

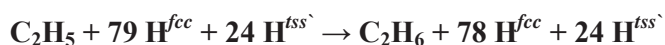

|   |                   |                   |                   |
|---|-------------------|-------------------|-------------------|
| C | 15.89647157094485 | 6.21342286557971  | 12.15836425452946 |
| C | 17.09767588273986 | 6.20010160517657  | 11.23982348087058 |
| H | 5.55162233635602  | 14.61631951176324 | 14.94541195495852 |
| H | 5.34223811627267  | 9.10025851259262  | 4.83211954262807  |
| H | 5.94632085986673  | 6.37564641409399  | 14.68569074554236 |
| H | 13.76853371366334 | 5.28955410497449  | 8.75851060602595  |
| H | 15.14134468835941 | 11.00838552898012 | 14.89126142755199 |
| H | 13.20116721481354 | 16.75160868173612 | 8.90747882442877  |
| H | 13.78370316678410 | 12.53180608517259 | 15.93256624099155 |
| H | 12.52515667680383 | 10.83608836733291 | 16.92999328506505 |
| H | 13.87116632601473 | 9.29016557186825  | 15.93646773044570 |
| H | 3.94669447620549  | 10.62163144567725 | 5.89672037104210  |
| H | 5.12348999691829  | 12.31216613328830 | 4.94603743170752  |
| H | 6.51110628426932  | 10.78592029077473 | 3.87692189846787  |
| H | 12.39224382908181 | 5.27313937192997  | 6.80086179182466  |
| H | 13.54094029556433 | 6.99407432361227  | 5.81692651768886  |
| H | 14.93646420529068 | 6.97021280456355  | 7.65973113423244  |
| H | 14.55638217439044 | 15.21760855245278 | 7.85776035275237  |
| H | 13.12396613319851 | 15.18397637657289 | 6.04199561375506  |
| H | 11.77281610656716 | 16.71974064600964 | 7.09445615980743  |
| H | 6.70987304791833  | 16.34954515962175 | 13.97896010851175 |
| H | 5.30688953011554  | 16.31676865650707 | 12.13792110627843 |
| H | 4.12989911037884  | 14.63080355329773 | 13.11372743190227 |
| H | 4.49372421449856  | 6.39173156901043  | 12.89133001911548 |
| H | 5.87413652247479  | 4.83861461651230  | 11.87929225522554 |
| H | 7.35351331966892  | 4.83539276083965  | 13.67369876016582 |
| H | 12.59928456606220 | 12.39793522612212 | 9.45860666404167  |
| H | 12.77047286883512 | 10.94451533455860 | 11.92583933903912 |
| H | 12.71084684782838 | 9.52848715257023  | 9.38497722487486  |
| H | 6.34972275371014  | 12.08072922931449 | 11.40384054887417 |
| H | 6.49618579754875  | 9.20474476838431  | 11.31205701314616 |
| H | 6.28482934941636  | 10.66032648826967 | 8.87206631893575  |
| H | 7.88870233624268  | 7.66851034496318  | 10.26197838106978 |
| H | 7.66764916135626  | 9.11141419951469  | 7.83238062205472  |
| H | 10.10898351584141 | 7.79426737081243  | 8.52894931792197  |

|   |                   |                   |                   |
|---|-------------------|-------------------|-------------------|
| H | 8.95618465930646  | 13.81762814397286 | 12.25607791036217 |
| H | 11.21193876290467 | 13.94925492100277 | 10.50073218156443 |
| H | 11.39811314279021 | 12.50999438126287 | 12.94024519390300 |
| H | 7.53447368605618  | 13.77912903727776 | 10.41992067402148 |
| H | 9.79499751925154  | 13.91454094626532 | 8.67208928211547  |
| H | 7.47409442329642  | 12.36332265524734 | 7.906102131115808 |
| H | 11.58711801270510 | 9.27458547789736  | 12.88341877362276 |
| H | 11.56388286075085 | 7.81015486268173  | 10.36618959198965 |
| H | 9.29513523722467  | 7.68071528363506  | 12.10708495949797 |
| H | 16.10293448557410 | 6.62509041531923  | 13.15313640181707 |
| H | 15.43060841767739 | 5.23014872586849  | 12.27937191675310 |
| H | 17.90344574412646 | 5.60773517799485  | 11.70881043253664 |
| H | 17.49997879010978 | 7.20387550212303  | 11.05663624472408 |
| H | 16.87190202354987 | 5.73927185164962  | 10.26775716285702 |
| H | 9.39751753392136  | 4.70033505600792  | 12.01144209071343 |
| H | 9.48278626758566  | 6.19582163302073  | 14.65752352631903 |
| H | 8.59472199289182  | 12.41192354218968 | 4.35267260751206  |
| H | 8.83988792333319  | 9.38814995093411  | 4.27814385680693  |
| H | 3.84287815377122  | 10.50731322989278 | 10.65668673104955 |
| H | 4.13326715986163  | 7.60071053144447  | 10.49090581148595 |
| H | 3.93838689316500  | 9.01671240961652  | 8.08813609282158  |
| H | 3.75441321201758  | 12.06341061332792 | 8.20785232309950  |
| H | 3.80677260693984  | 13.45877573327822 | 10.70931951980505 |
| H | 4.03934805029834  | 11.89012597655259 | 13.24810692555470 |
| H | 4.18736374568134  | 9.05881319603081  | 13.17925682122315 |
| H | 7.28235109825937  | 13.88868727293667 | 5.38065369240895  |
| H | 7.40379257348753  | 16.72980092373443 | 10.53161686352025 |
| H | 7.27212326694391  | 15.38442723273706 | 7.91225881159171  |
| H | 4.95469569982719  | 15.11841367106799 | 9.70531533259854  |
| H | 4.91230995910975  | 13.74621417714387 | 7.24646434652491  |
| H | 7.87256754314062  | 13.54966648285164 | 15.81067970306468 |
| H | 7.89220751426738  | 10.60545206526641 | 15.83449352439591 |
| H | 8.11718643633710  | 7.65930927810606  | 15.64712039440743 |
| H | 5.39523365863518  | 11.93804348393287 | 15.01681997032447 |
| H | 5.60415949668880  | 9.05093162845872  | 14.94469592386676 |
| H | 8.09416992053151  | 4.68098143060510  | 10.20181143240798 |
| H | 7.66465740075351  | 7.71081310752111  | 5.20584379276614  |
| H | 7.74418036670800  | 6.07945597861030  | 7.65691258795245  |
| H | 5.27341732674859  | 7.55833512881337  | 7.06105423618779  |
| H | 5.49610225645087  | 6.07311742400566  | 9.51903106447722  |
| H | 8.80925870869044  | 16.78643935082035 | 12.28936588331225 |
| H | 9.04596931544790  | 15.23337541238802 | 14.87073893492476 |
| H | 15.15790132376091 | 11.02479514401758 | 10.16197319275270 |
| H | 15.04723594767409 | 9.64309902022601  | 7.60808440109780  |
| H | 14.90017302792267 | 12.57469939634856 | 7.60225160028237  |
| H | 14.95473703930013 | 13.98204751966880 | 10.25688424189021 |
| H | 15.13729130103823 | 12.52044702511142 | 12.64982595184677 |
| H | 15.31552172553185 | 9.54105129130737  | 12.76060068886841 |
| H | 14.56082522104115 | 6.44528077249547  | 11.16464278632778 |
| H | 14.07877157457366 | 7.90304335999477  | 13.65550153044643 |
| H | 11.77571390593650 | 7.74587183782230  | 15.42085032854981 |
| H | 11.70225401348337 | 4.91201678431019  | 10.25230064464577 |
| H | 11.80239455765250 | 6.24692136817697  | 12.82714824142664 |
| H | 10.04892931505380 | 6.39065146466567  | 5.87754392682558  |
| H | 10.26244013782119 | 4.83564912968220  | 8.48566782285088  |
| H | 13.51001838214291 | 12.47164644799625 | 5.85628300625571  |
| H | 13.69016897875620 | 9.68409587235153  | 5.76702842492540  |

|    |                   |                   |                   |
|----|-------------------|-------------------|-------------------|
| H  | 10.92662440183405 | 13.90870254649745 | 5.11979328275670  |
| H  | 11.24574862720588 | 8.06244777603890  | 4.94735286849902  |
| H  | 11.16515955617507 | 10.99544682299491 | 4.93607182759911  |
| H  | 9.66892287832789  | 16.87337258756534 | 8.76699825425317  |
| H  | 9.60362736485786  | 15.43376752301623 | 6.11964023215890  |
| H  | 11.45613227655991 | 13.93297446674769 | 15.57195052152956 |
| H  | 11.35268897272965 | 15.54253248787687 | 13.11681369077369 |
| H  | 11.01279920853290 | 16.91562614913487 | 10.56772070173020 |
| H  | 13.62062150777825 | 15.48361434806518 | 11.26444129862928 |
| H  | 13.82406878974133 | 14.05546163393693 | 13.68315952543836 |
| H  | 10.30479228700316 | 12.26369124784144 | 16.51418102542349 |
| H  | 10.36424567232669 | 9.22742534711204  | 16.42254184514145 |
| H  | 7.91318027609855  | 9.21683707398884  | 13.10199971933557 |
| H  | 7.75291266890028  | 12.10607842910969 | 13.22510473903293 |
| H  | 10.19209948033681 | 10.76872317555110 | 13.91472377570366 |
| H  | 11.14095172805551 | 12.36378337986137 | 7.65351306935304  |
| H  | 11.32141753577550 | 9.51104328153024  | 7.54595338728547  |
| H  | 8.85122330848911  | 10.83118951782114 | 6.86597366003754  |
| Pd | 13.86277341183386 | 13.91820415252814 | 6.95883805490380  |
| Pd | 13.92054282023620 | 15.28824472986105 | 9.45572875987761  |
| Pd | 14.19784741324002 | 13.87923905980941 | 11.90585332237083 |
| Pd | 14.10443787236862 | 11.08239530034316 | 6.84635401065688  |
| Pd | 14.41735112485815 | 12.47190402960076 | 9.37338516348266  |
| Pd | 14.58414757442526 | 10.94269598056960 | 11.84959025112070 |
| Pd | 14.15634027850742 | 8.25859613762619  | 6.82877997533347  |
| Pd | 14.31824676174902 | 12.38995365991333 | 14.30810637234216 |
| Pd | 14.48052485496395 | 9.58853044495322  | 9.34095111237361  |
| Pd | 14.59466054499827 | 8.01631906580376  | 11.81990479116607 |
| Pd | 14.41680377128577 | 9.53243674949488  | 14.29988109620128 |
| Pd | 14.37269026494777 | 6.81476297931964  | 9.26426714525294  |
| Pd | 11.48509711047931 | 16.62191527030977 | 8.78910572734524  |
| Pd | 11.41937782820449 | 15.24830973505906 | 6.27138076549669  |
| Pd | 11.65870310654960 | 13.83869365332626 | 8.68666707547392  |
| Pd | 11.80074668635489 | 15.46553056330245 | 11.37008008064636 |
| Pd | 11.68023287683054 | 12.43371966427491 | 5.90687442112912  |
| Pd | 11.99928596791747 | 14.01337016051574 | 13.82003328886555 |
| Pd | 11.80975660972280 | 10.95450301892138 | 8.60696072495088  |
| Pd | 11.87462446979525 | 12.35754559633782 | 11.15800043960554 |
| Pd | 11.84643215901071 | 9.57921342154995  | 5.79181264898587  |
| Pd | 11.97110704915373 | 8.05116814875585  | 8.54190014148745  |
| Pd | 12.03850844650605 | 10.89719152956613 | 13.64917552705873 |
| Pd | 12.07736000698455 | 12.26321217526533 | 16.07236567892698 |
| Pd | 12.08507034129673 | 9.44154331597367  | 11.11553634270191 |
| Pd | 11.86269096499396 | 6.72885345160102  | 6.05701227661663  |
| Pd | 12.06567896076363 | 5.27783828536401  | 8.49991224599213  |
| Pd | 12.16735935057868 | 9.40821119538395  | 16.03040605987311 |
| Pd | 12.33209286791678 | 6.38106759319750  | 11.12868908020151 |
| Pd | 12.27982842811520 | 7.77423587051961  | 13.66810119247115 |
| Pd | 9.23443791049684  | 16.59224253153455 | 10.52194567185062 |
| Pd | 9.12053327287409  | 13.80271556374946 | 5.43231405679239  |
| Pd | 9.06844217223412  | 15.38837596238235 | 7.87388208065242  |
| Pd | 9.37844643243680  | 13.70105746775502 | 10.45715399044471 |
| Pd | 9.37842374694139  | 10.92487905499831 | 5.11413716723794  |
| Pd | 9.56029483073394  | 15.33739233837263 | 13.12396807653002 |
| Pd | 9.31459355765600  | 12.29688392843405 | 7.90593418234485  |
| Pd | 9.66278130467510  | 13.63381757634122 | 15.48456657031683 |
| Pd | 9.53649382280961  | 10.80963228130614 | 10.39071406022433 |



|    |                   |                   |                   |
|----|-------------------|-------------------|-------------------|
| Pd | 9.45508140683585  | 8.00460555444566  | 5.27654387535641  |
| Pd | 9.57466635286792  | 12.21996752843158 | 12.95445058343929 |
| Pd | 9.50158593670301  | 9.38576291135370  | 7.81365917081084  |
| Pd | 9.68166351531069  | 10.74199144082575 | 15.67288259352377 |
| Pd | 9.71881349542574  | 7.90603959412462  | 10.32657076788618 |
| Pd | 9.74577791837905  | 9.29945230566453  | 12.87669514023847 |
| Pd | 9.53555032270692  | 6.27657257431544  | 7.63239449239814  |
| Pd | 9.91579150192571  | 7.81852659541352  | 15.35257787357387 |
| Pd | 9.85884720514175  | 5.02172410134942  | 10.25269969427517 |
| Pd | 10.00947459249625 | 6.20099637249416  | 12.89212671377204 |
| Pd | 7.41297602846536  | 9.16808450269515  | 14.87584231595904 |
| Pd | 7.31183255351130  | 6.13966249862383  | 9.40842071867598  |
| Pd | 7.59892021127737  | 4.96368232241673  | 11.97762860960166 |
| Pd | 7.65478068579652  | 6.34332114809938  | 14.47924479461228 |
| Pd | 7.41284070999529  | 7.76058580454060  | 12.07582211414175 |
| Pd | 7.23869660512613  | 9.26310724905233  | 9.62079535751841  |
| Pd | 7.23607523482605  | 12.04284666579327 | 14.97749792757278 |
| Pd | 7.25348961976430  | 10.65941796884997 | 12.17645464919116 |
| Pd | 7.10272638855156  | 7.60728027359366  | 6.95151909980130  |
| Pd | 7.01415974523090  | 12.16247511283080 | 9.68587312994652  |
| Pd | 7.02991056150128  | 9.36746898565475  | 4.69541575648418  |
| Pd | 7.22939225692843  | 14.87992553721108 | 14.70830599831974 |
| Pd | 7.00497883591511  | 10.72677354709251 | 7.14992809848213  |
| Pd | 7.10903694232316  | 13.55821190081227 | 12.23739402911653 |
| Pd | 6.79610898444993  | 15.25248834090754 | 9.63480254294817  |
| Pd | 6.84679428549605  | 12.21615934687961 | 4.79735542182257  |
| Pd | 6.74390311877604  | 13.85284789574827 | 7.13475070028455  |
| Pd | 7.02280464963143  | 16.34524864186992 | 12.27845216627157 |
| Pd | 5.16305527335257  | 6.29163637517369  | 11.30810987055355 |
| Pd | 5.21634452204351  | 7.66704302851706  | 13.80987136964518 |
| Pd | 4.67096162035664  | 9.09239644086523  | 11.41267365147564 |
| Pd | 4.98618809983486  | 10.49858080191643 | 13.96118481138424 |
| Pd | 4.91218141233335  | 7.68423692822908  | 8.85001766415107  |
| Pd | 4.51867679261204  | 11.95491862833195 | 11.48283348285514 |
| Pd | 4.77874970525326  | 9.21726433862350  | 6.46396700444129  |
| Pd | 4.45781016685037  | 10.55560328444322 | 8.96636620254168  |
| Pd | 4.92167846913046  | 13.34335809857743 | 13.95167679780083 |
| Pd | 4.71169116484175  | 14.82074162204334 | 11.51145924480303 |
| Pd | 4.59743625430518  | 12.06986312149873 | 6.55910452881214  |
| Pd | 4.54633957606173  | 13.48744867745736 | 9.01761411459592  |

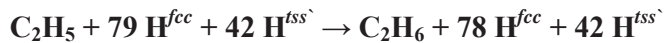

|   |                   |                   |                   |
|---|-------------------|-------------------|-------------------|
| C | 16.24776423095184 | 6.32680344716678  | 12.28943358592979 |
| C | 17.37714505140611 | 6.08105324881462  | 11.31397235794284 |
| H | 11.32203548200812 | 6.52481592064317  | 7.75170980795209  |
| H | 15.39696633560556 | 8.19297841921295  | 9.89719028410811  |
| H | 14.09115866823366 | 9.56950804999334  | 10.97951028274448 |
| H | 13.83412530809244 | 10.97676789535115 | 13.47198464954397 |
| H | 11.39231456752331 | 10.76880692713932 | 15.39794973882931 |
| H | 9.16997039672076  | 9.14250154904228  | 14.70732684727729 |
| H | 6.89803411276994  | 7.72524978746715  | 13.91128262849326 |
| H | 6.88557685361396  | 6.21331920711689  | 11.19987101560182 |
| H | 9.13547526918386  | 6.27599172645707  | 9.54917200684503  |
| H | 5.50682060504155  | 14.53304563665905 | 14.85969878992504 |
| H | 5.40852911216009  | 9.00326616236402  | 4.92779501083533  |

|   |                   |                   |                   |
|---|-------------------|-------------------|-------------------|
| H | 5.85669503708276  | 6.20679744089548  | 14.73556289309415 |
| H | 13.97473475197556 | 5.20253526827211  | 8.70354967015268  |
| H | 15.29059419456224 | 11.03805203991061 | 15.02783090541780 |
| H | 13.24503814822556 | 16.88044984592640 | 8.74667840502574  |
| H | 13.84912285402101 | 12.53946526465695 | 16.05822541573406 |
| H | 12.65858727630022 | 10.82409417885345 | 17.01459476743773 |
| H | 14.04880032994030 | 9.23518230219279  | 16.01825524374193 |
| H | 3.96943664966315  | 10.55039700386248 | 5.94836319126367  |
| H | 5.20653943702479  | 12.36391595994037 | 4.94543358842882  |
| H | 6.61270973340305  | 10.79137636491333 | 3.94793734153390  |
| H | 12.57153384546395 | 5.19507455041171  | 6.82528570092207  |
| H | 13.74221725902767 | 6.89748110151666  | 5.89060310401707  |
| H | 15.14936958483415 | 7.03411601373671  | 7.65927774231093  |
| H | 14.81098741963863 | 15.23617965752326 | 7.89210490644708  |
| H | 13.23828734331038 | 15.38647821723687 | 6.11045198005054  |
| H | 11.66321139440011 | 16.89178258895247 | 7.01593589936887  |
| H | 6.70873419795642  | 16.27567584389593 | 13.87650916715496 |
| H | 5.28664027778538  | 16.28632114456034 | 12.06250562164275 |
| H | 4.04401427792343  | 14.49208410501941 | 13.06527468352832 |
| H | 4.36973756629900  | 6.33843340041256  | 12.93416887546756 |
| H | 5.84257670036699  | 4.74107652706425  | 12.07254463141740 |
| H | 7.48210585380814  | 4.66776210863223  | 13.81848880771737 |
| H | 12.60610503255443 | 12.49129244413858 | 9.41821720124684  |
| H | 12.64246993674313 | 11.05813274159005 | 11.77337950740857 |
| H | 12.68125171786485 | 9.64691342622667  | 9.33417302257384  |
| H | 6.15583261275018  | 12.10353735547707 | 11.33960351890578 |
| H | 6.31563537335872  | 9.28316518579939  | 11.27344233758402 |
| H | 6.12072509273721  | 10.74282758875683 | 8.85366341101260  |
| H | 7.72809248564761  | 7.80413381039429  | 10.19148292854844 |
| H | 7.48010223591484  | 9.14040081817183  | 7.76421461312304  |
| H | 9.89760156931657  | 7.96745752549871  | 8.50355121102816  |
| H | 8.79473434256034  | 13.97401467902306 | 12.23401987379766 |
| H | 10.96681002252631 | 13.98875230280990 | 10.49230915622114 |
| H | 11.12402350838025 | 12.61424729082812 | 12.84890106432063 |
| H | 7.36949224791416  | 13.86033107197092 | 10.36322215593253 |
| H | 9.60309998916345  | 14.00702555209047 | 8.62523289738233  |
| H | 7.35053565078646  | 12.48088749475022 | 7.87114837363115  |
| H | 11.39153502464905 | 9.22075783072460  | 12.80138379985815 |
| H | 11.33284726792282 | 7.87500814655599  | 10.43908295327253 |
| H | 9.20368803112069  | 7.62851288788226  | 12.15829169638256 |
| H | 12.79122920746054 | 6.69949362331976  | 9.49630937975059  |
| H | 12.95658221798309 | 7.71455052117938  | 11.98370548581520 |
| H | 12.76434720611657 | 9.34169140210812  | 14.37323704484433 |
| H | 12.59563442959100 | 12.50146448202938 | 14.41472512201696 |
| H | 12.52797937013413 | 13.95094111315160 | 11.99303141627374 |
| H | 12.21771177463265 | 15.37516182662500 | 9.61333681700858  |
| H | 12.20239961106835 | 13.86797857581579 | 6.91737182183481  |
| H | 12.47545967417846 | 11.07578989072094 | 6.85944987135235  |
| H | 12.55723279095385 | 8.28309613884391  | 6.85295245686573  |
| H | 16.56594367274323 | 6.87945024952543  | 13.18006803843025 |
| H | 15.72125600207255 | 5.41869961096153  | 12.59758894406273 |
| H | 18.17100712357432 | 5.50615827206288  | 11.82231623685590 |
| H | 17.83224364834336 | 7.01181552306925  | 10.95437497421580 |
| H | 17.05662469481868 | 5.50099301424004  | 10.43800012959977 |
| H | 9.42411564206717  | 4.65822692796203  | 12.05092135085306 |
| H | 9.43398081862309  | 6.14563015807852  | 14.69897838681011 |
| H | 8.69985533285485  | 12.43325180254516 | 4.37586355902213  |

|   |                   |                   |                   |
|---|-------------------|-------------------|-------------------|
| H | 8.87437486853986  | 9.40759187917763  | 4.37767490057157  |
| H | 3.74477324123775  | 10.43544599118817 | 10.66109322241806 |
| H | 4.06161920043272  | 7.47010437272696  | 10.56836992365928 |
| H | 3.87411483838936  | 8.99481122730661  | 8.11748653899681  |
| H | 3.66481729966320  | 12.07535130142811 | 8.13883468737441  |
| H | 3.70180705451460  | 13.43896760470956 | 10.61478453349577 |
| H | 3.92595143822464  | 11.79910914928223 | 13.23247244747822 |
| H | 4.07662230599096  | 8.93426266595480  | 13.24547911336966 |
| H | 7.33074434548731  | 13.98034797876352 | 5.34331823877080  |
| H | 7.38672071136580  | 16.80318446498354 | 10.42654532981462 |
| H | 7.23744201347357  | 15.48376632108315 | 7.82617253062583  |
| H | 4.88776428506914  | 15.14510659556982 | 9.66322777116916  |
| H | 4.84702790704109  | 13.76979363287317 | 7.17303458971246  |
| H | 7.81811471703335  | 13.48284146191528 | 15.74347354257280 |
| H | 7.83254767308115  | 10.52917206574384 | 16.12541361587882 |
| H | 8.06875488522571  | 7.55212114883842  | 15.78010900384156 |
| H | 5.38610658429506  | 11.82436132546198 | 14.98627946162142 |
| H | 5.46243897605408  | 9.08602455933106  | 15.02608325211698 |
| H | 8.00318213293365  | 4.50891742322532  | 10.32258247365459 |
| H | 7.69274372676693  | 7.72171504727174  | 5.31869284573043  |
| H | 7.73822800635524  | 5.83939970044776  | 7.63436270817582  |
| H | 5.28938846148686  | 7.49312415008421  | 7.15578035216904  |
| H | 5.41654119104571  | 6.03445813972673  | 9.47404948149601  |
| H | 8.79565708175801  | 16.76773138077015 | 12.23129368262851 |
| H | 8.98647338781657  | 15.17352638949317 | 14.79252493241303 |
| H | 15.35183589292044 | 11.18006815847926 | 10.13738063171298 |
| H | 15.15862293661027 | 9.79265936957720  | 7.51823347268962  |
| H | 14.95263280869796 | 12.60793652429521 | 7.59930384665936  |
| H | 14.95934566241255 | 14.10513263044017 | 10.22634365030888 |
| H | 15.22086770623226 | 12.64510535246278 | 12.63868186737399 |
| H | 15.48357715085200 | 9.60341975970808  | 12.79439887598382 |
| H | 14.91310524039546 | 6.47121613308340  | 11.13321760176247 |
| H | 14.28425917650826 | 7.92635982569175  | 13.62708141734525 |
| H | 11.72532376665502 | 7.61758489014785  | 15.46762229281643 |
| H | 11.66472204176459 | 4.76027121423570  | 10.35176268590272 |
| H | 11.83069057193049 | 6.07900568535222  | 12.97592035753979 |
| H | 10.08280356049879 | 6.39261814442475  | 5.91138119711440  |
| H | 10.41234922714540 | 4.68209613388338  | 8.51400637133192  |
| H | 13.65932115285572 | 12.65878540443026 | 5.76529942837607  |
| H | 13.80868809132091 | 9.67679632371911  | 5.69664092169346  |
| H | 10.91612390690478 | 13.93757078366967 | 5.03931468254680  |
| H | 11.25784109548493 | 8.08823014392338  | 4.96432642484031  |
| H | 11.33041219148945 | 11.04622018436129 | 4.73193682433573  |
| H | 9.66442831224087  | 16.99257396461192 | 8.72434709417715  |
| H | 9.64838745568351  | 15.50632353449286 | 6.05632999030768  |
| H | 11.36754637266181 | 13.95609272532936 | 15.55722356424436 |
| H | 11.44072783367964 | 15.73708585796658 | 13.19753077390645 |
| H | 10.97526839852103 | 17.01983170363857 | 10.56966853664946 |
| H | 13.70670563194541 | 15.67836899817314 | 11.22242723404039 |
| H | 13.95234160305644 | 14.12298639535058 | 13.75025850851502 |
| H | 10.19025942865452 | 12.26358852063423 | 16.50945554611883 |
| H | 10.49146109298416 | 9.119537850000460 | 16.56386375478121 |
| H | 9.94312220698741  | 10.89796287314894 | 13.79119893748136 |
| H | 7.53542012519989  | 12.15676863007043 | 13.25018365733024 |
| H | 7.78000111210570  | 9.39015945542174  | 13.07043047487252 |
| H | 8.73130028105097  | 10.94485840124910 | 6.75559367666742  |
| H | 10.95097250274555 | 12.38054630202186 | 7.64824614125599  |

|    |                   |                   |                   |
|----|-------------------|-------------------|-------------------|
| H  | 11.08166281460677 | 9.62127239951928  | 7.58638752452139  |
| Pd | 13.97757460547949 | 14.04278857980344 | 6.93566525335769  |
| Pd | 13.98772532469497 | 15.43921043781870 | 9.42190894805842  |
| Pd | 14.29158821489346 | 14.02957596974552 | 11.94439084471520 |
| Pd | 14.23504129124037 | 11.16811870401636 | 6.73601982641287  |
| Pd | 14.45292431416722 | 12.56956100752271 | 9.37088524235681  |
| Pd | 14.64539083022187 | 11.05032349511215 | 11.85458319863517 |
| Pd | 14.32634105340616 | 8.28281975262921  | 6.78048064576055  |
| Pd | 14.43768767807163 | 12.45234713933524 | 14.39885228203758 |
| Pd | 14.59665723510074 | 9.70537486966532  | 9.27530334099148  |
| Pd | 14.83618284602498 | 8.01204891877228  | 11.82479771733614 |
| Pd | 14.59084905589918 | 9.54653459520978  | 14.35588616166265 |
| Pd | 14.53357532385700 | 6.77455097748411  | 9.27757366048280  |
| Pd | 11.50024164131656 | 16.79837448179133 | 8.74089413595944  |
| Pd | 11.48180702831871 | 15.37566512071671 | 6.18446117825549  |
| Pd | 11.52255594985182 | 13.86349371010198 | 8.67647898850709  |
| Pd | 11.83357311087699 | 15.59047169385916 | 11.37605810301362 |
| Pd | 11.77162067977282 | 12.49238255771690 | 5.80916145006716  |
| Pd | 12.02140920413076 | 14.07080835240860 | 13.82012279064540 |
| Pd | 11.69344317178393 | 11.02926524640497 | 8.61039878010984  |
| Pd | 11.70541621905701 | 12.44586392617650 | 11.10067589986290 |
| Pd | 11.91222082566644 | 9.61963549425257  | 5.79826577989594  |
| Pd | 11.81024629702519 | 8.17433117068033  | 8.59908684655678  |
| Pd | 11.85338082102728 | 10.93924694311422 | 13.49913862028331 |
| Pd | 12.10310614743189 | 12.28102364342614 | 16.18936149084436 |
| Pd | 12.02259034714696 | 9.46524885959561  | 11.09033765570998 |
| Pd | 11.99550021966992 | 6.66477105054041  | 6.03358782654524  |
| Pd | 12.20889760583013 | 5.14055934247346  | 8.55227744667995  |
| Pd | 12.28502445855639 | 9.33598076908058  | 16.13771916763727 |
| Pd | 12.18296877046891 | 6.36136847948883  | 11.16563079131007 |
| Pd | 12.33503981510463 | 7.74289911784554  | 13.69104028609493 |
| Pd | 9.20455578705370  | 16.68755935751238 | 10.46271308844314 |
| Pd | 9.15255976527070  | 13.87697130403287 | 5.39717159545869  |
| Pd | 9.03233039283278  | 15.52300165184787 | 7.79843973646148  |
| Pd | 9.20232316014499  | 13.81367470713794 | 10.40232432018416 |
| Pd | 9.49962826059557  | 10.95168264715793 | 5.08683184896152  |
| Pd | 9.60031218924342  | 15.37978198539456 | 13.09509765783741 |
| Pd | 9.18310687586261  | 12.39105932172138 | 7.85965875400916  |
| Pd | 9.61045472436078  | 13.58597248575080 | 15.43825510111960 |
| Pd | 9.34836763857133  | 10.90478994817384 | 10.34161282639520 |
| Pd | 9.50538456721063  | 8.00013640738263  | 5.36120144978131  |
| Pd | 9.37652717694983  | 12.29835507160637 | 12.85670527476420 |
| Pd | 9.32520025220248  | 9.50422779660837  | 7.81496327831384  |
| Pd | 9.65452889603496  | 10.65820458810529 | 15.74437796312702 |
| Pd | 9.52524419768377  | 8.01668680196281  | 10.30132724447284 |
| Pd | 9.57902409428344  | 9.37421556538755  | 12.81939328506406 |
| Pd | 9.56475903614131  | 6.21225466802633  | 7.69472452235876  |
| Pd | 9.92474958288913  | 7.74470023834322  | 15.48211788772555 |
| Pd | 9.85041925628643  | 4.82745556128319  | 10.26651936193239 |
| Pd | 10.00018733335334 | 6.15466005500994  | 12.96561741608959 |
| Pd | 7.32949086575301  | 9.10003861877184  | 15.02160861946852 |
| Pd | 7.27714936583908  | 6.01547677866822  | 9.43540197793501  |
| Pd | 7.59018862005760  | 4.83724893986397  | 12.08597459452107 |
| Pd | 7.60508341171338  | 6.23198565787862  | 14.58446488202120 |
| Pd | 7.32722307715142  | 7.84715997336124  | 12.06092887426981 |
| Pd | 7.01801529825333  | 9.31798043467922  | 9.57968308895191  |
| Pd | 7.20241567401252  | 11.92465483658653 | 15.03632019599588 |

|    |                  |                   |                   |
|----|------------------|-------------------|-------------------|
| Pd | 7.06050467576741 | 10.72430558470705 | 12.13645506135944 |
| Pd | 7.11121233763037 | 7.49837118484577  | 7.02164985319654  |
| Pd | 6.89522886449076 | 12.22124524896199 | 9.64829269675986  |
| Pd | 7.08401694216948 | 9.39329609764921  | 4.83795842644686  |
| Pd | 7.18818729251029 | 14.78170945140698 | 14.58380489698025 |
| Pd | 6.90549698634353 | 10.81687465962217 | 7.15349085447271  |
| Pd | 6.95914543395165 | 13.57813180906646 | 12.16281719482343 |
| Pd | 6.69837127157405 | 15.35733414566135 | 9.53938395211685  |
| Pd | 6.91782573543180 | 12.24142914863833 | 4.79219396860284  |
| Pd | 6.66527824792342 | 13.97164176479194 | 7.04503700737286  |
| Pd | 6.99920882979701 | 16.33566778585488 | 12.19905367956551 |
| Pd | 5.07160707761183 | 6.14236361632043  | 11.35779506590222 |
| Pd | 5.09103637788363 | 7.56157105753005  | 13.93331204116073 |
| Pd | 4.52971186710205 | 9.02728351104948  | 11.44727503182851 |
| Pd | 4.86425880802090 | 10.41867037051826 | 13.97050448362564 |
| Pd | 4.80691828275406 | 7.62407622670968  | 8.90549072707255  |
| Pd | 4.33222561879919 | 11.93912703840913 | 11.45547692007719 |
| Pd | 4.79609677868110 | 9.15156795036282  | 6.51774522088739  |
| Pd | 4.29739800740996 | 10.56285881795904 | 8.95738809472869  |
| Pd | 4.86624414298089 | 13.25372598019623 | 13.92988539860580 |
| Pd | 4.61438210556876 | 14.81072382153115 | 11.46527106305272 |
| Pd | 4.55564267900250 | 12.07210596462362 | 6.51636232296501  |
| Pd | 4.45000865547833 | 13.51883575636309 | 8.94981337249623  |
